# Supplementary material for: Host-Diet Effect on the Metabolism of Bifidobacterium
Source: MDPI journal article supplement (doi:10.3390/genes12040609), 2021-04-20
Supplement: s1 [file s1]

a

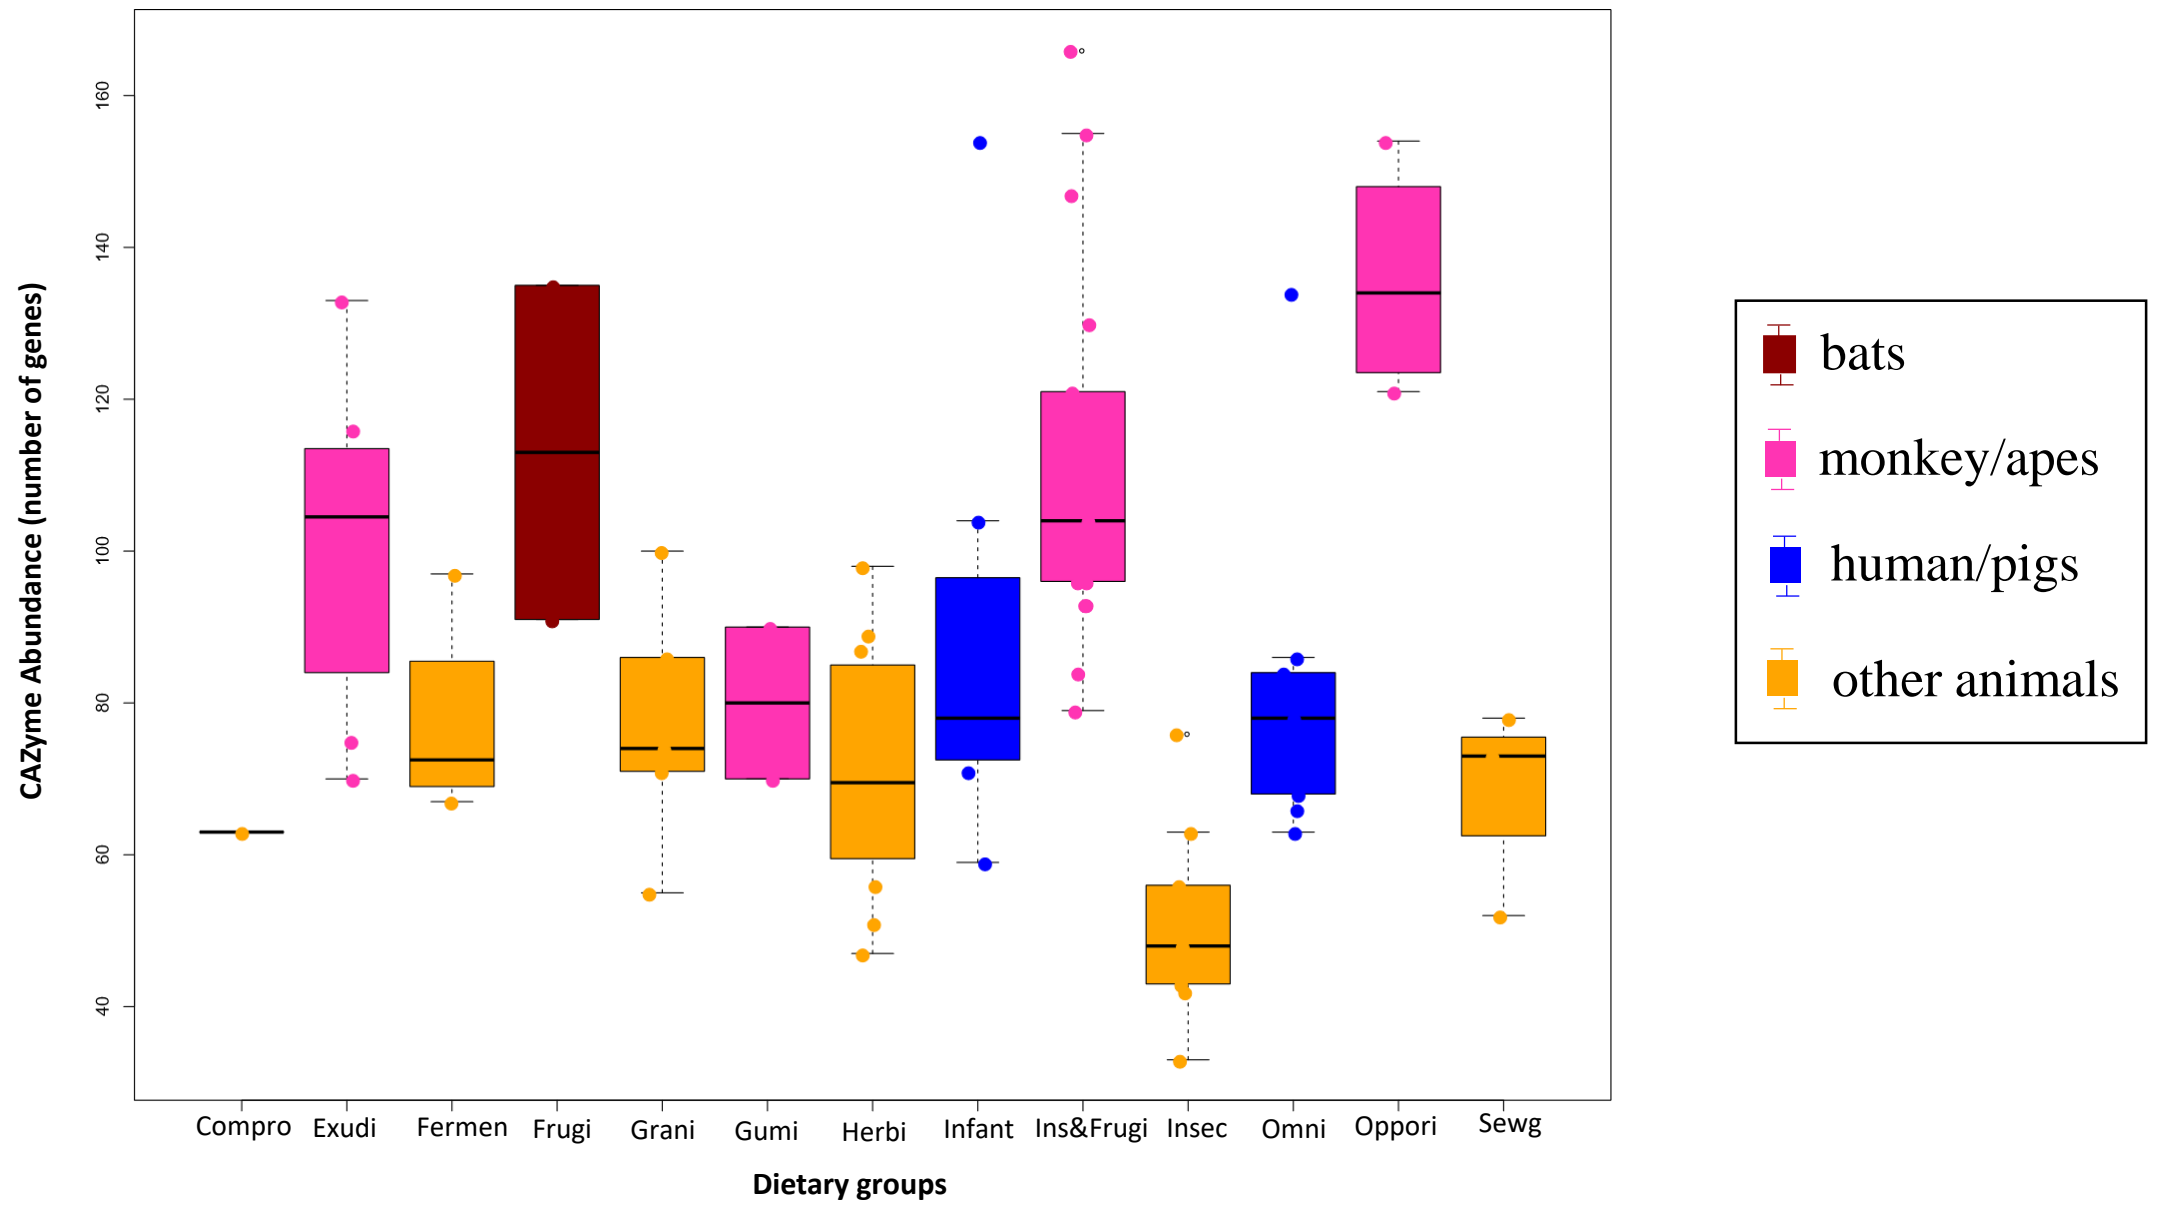

b

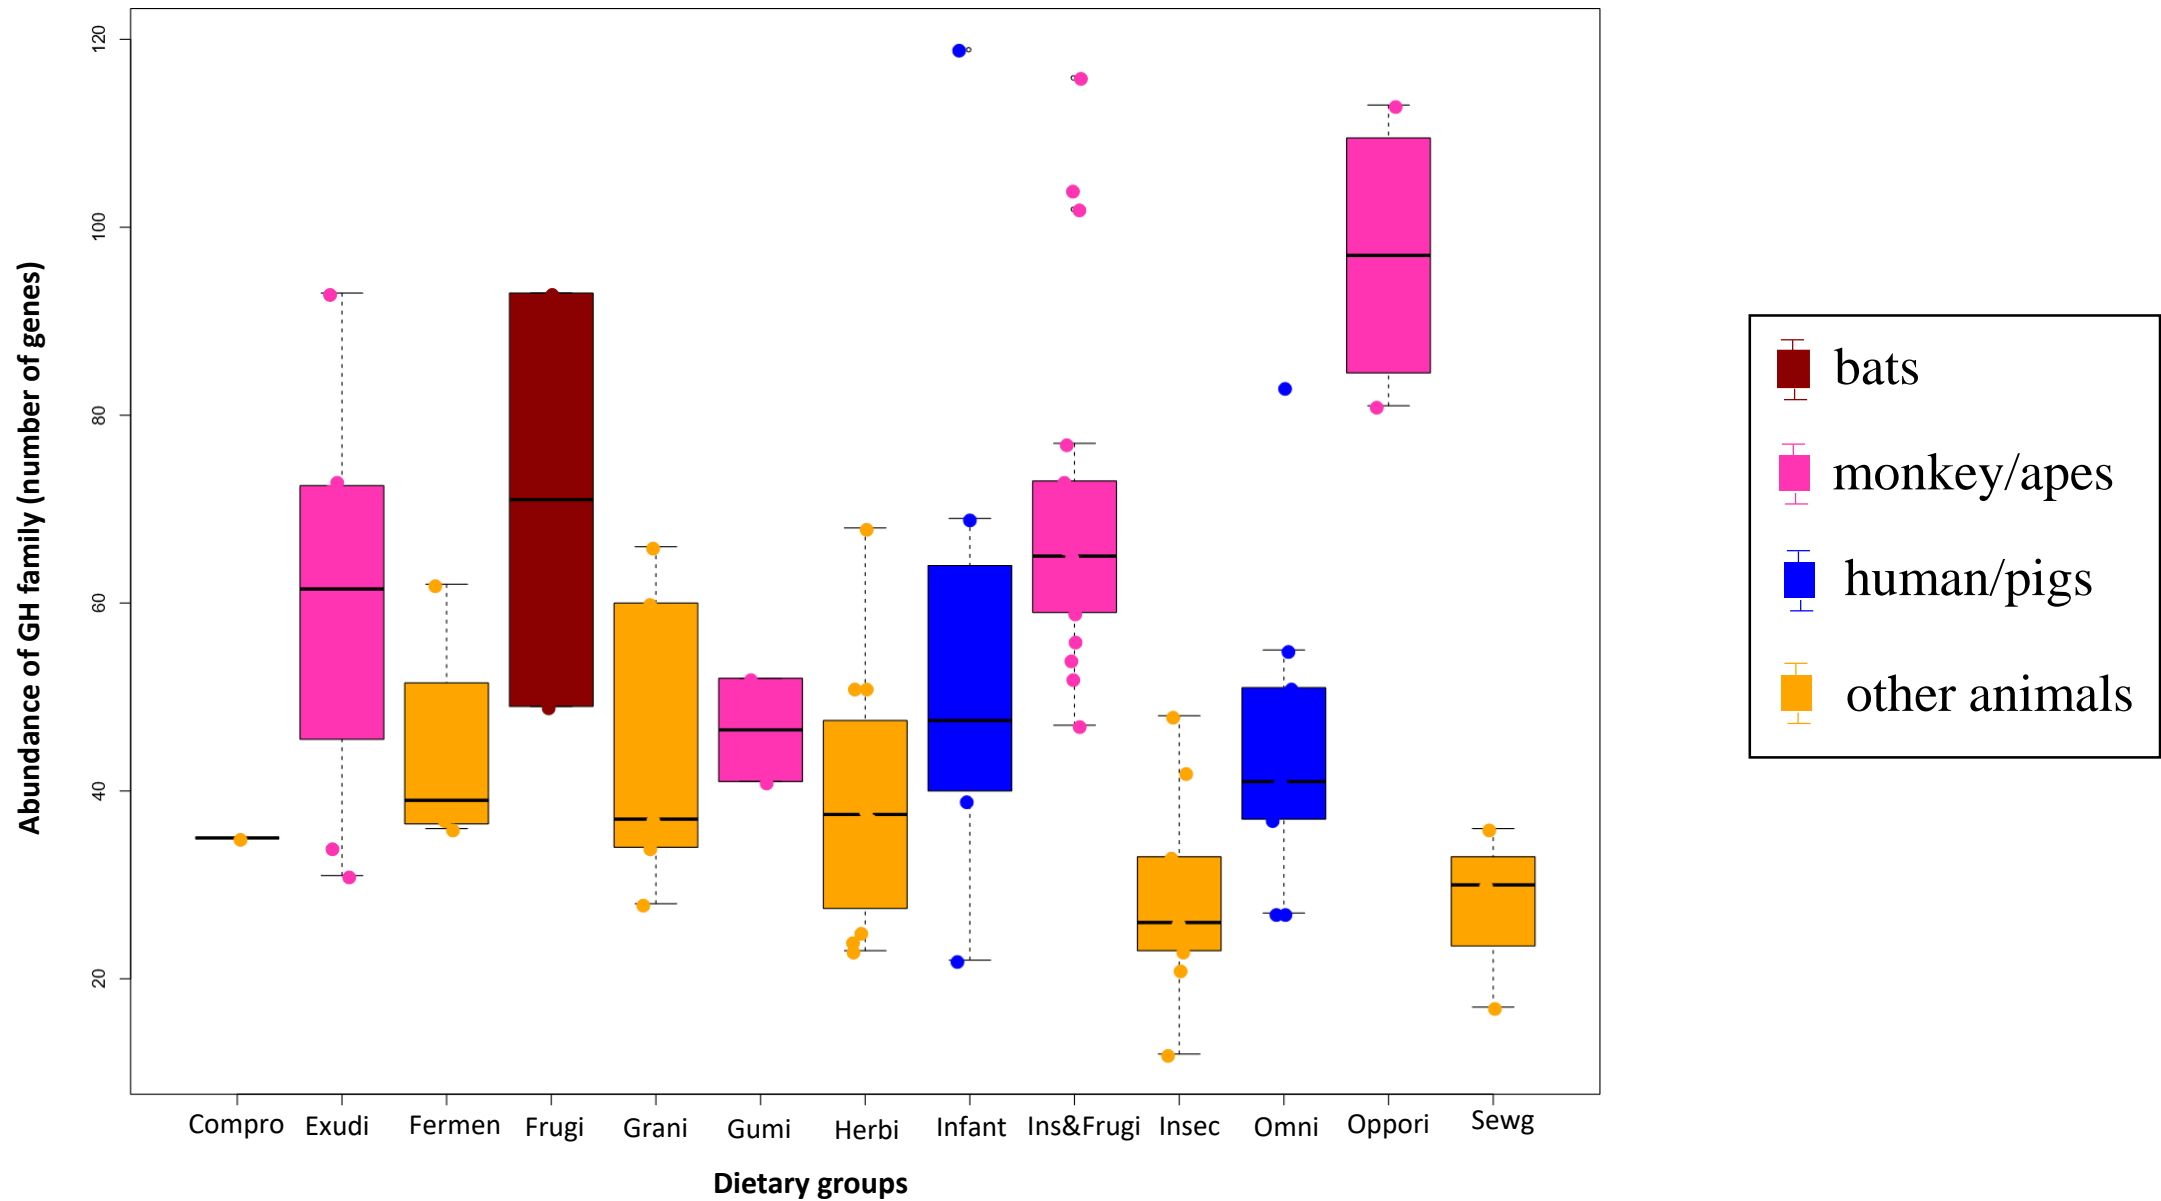

**Figure S2.** CAZyme families and GHs genes encoded by the strains in each dietary group **(a)** Abundances of the CAZyme families. **(b)** Abundance of genes encoding GHs. Compro: Commercial probiotic; Exudi: Exudativore; Fermen: Fermented food; Frugi: Frugivore; Grani: Granivore; Gumi: Gummivore; Herbi: Herbivore; Infant: Infant food; Ins&Frugi: Frugivore eating insects; Insec: Nectarivore, palynivore; Omni: Omnivore; Oppori: Opportunistic omnivore eating fruits, leaves and insects; Sewg: Sewage.
