# Supplementary material for: Host-Diet Effect on the Metabolism of Bifidobacterium
Source: MDPI journal article supplement (doi:10.3390/genes12040609), 2021-04-20
Supplement: s1 [file s1]

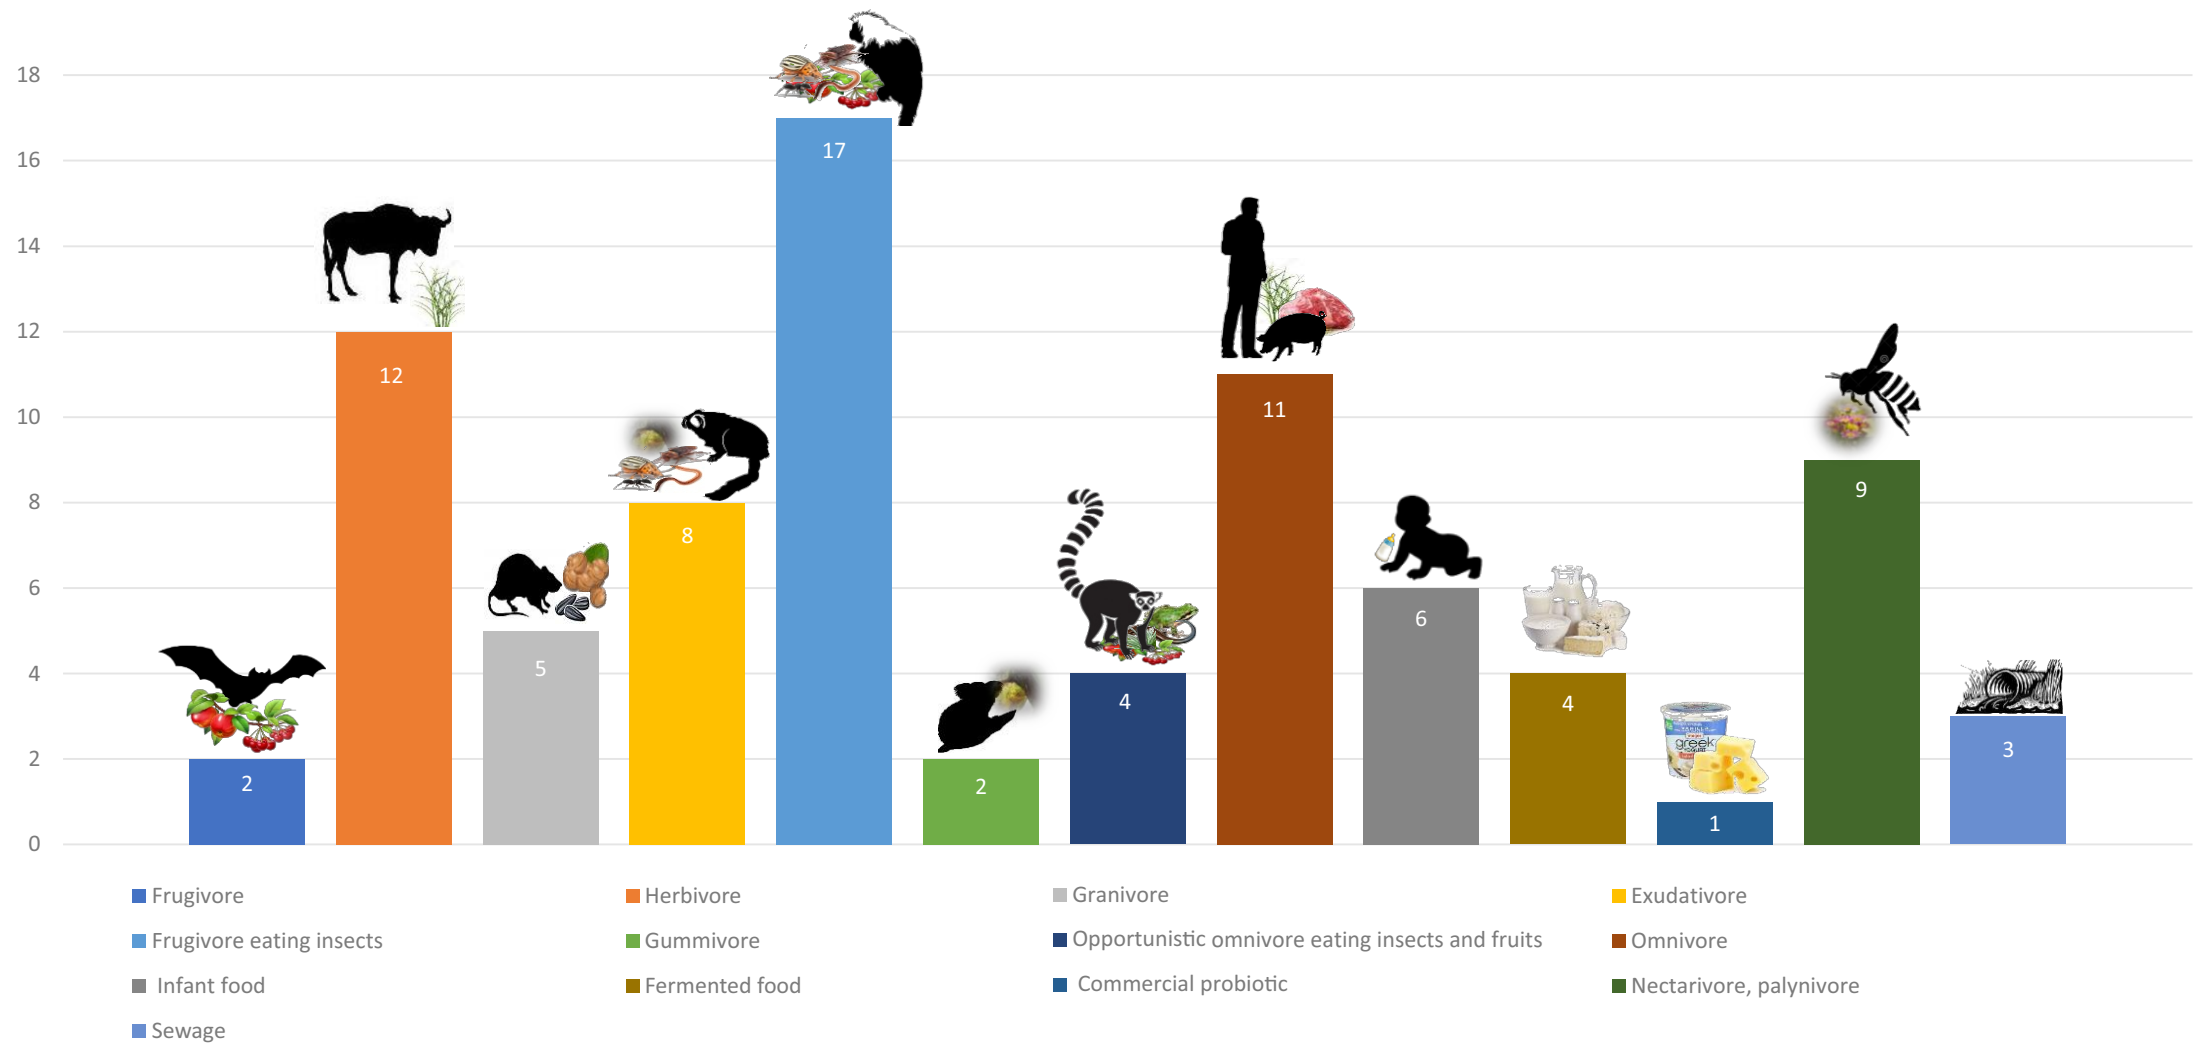

**Figure S1.** Grouping of bifidobacterial species in accordance with the dietary pattern of their respective host, The chart displays the number of species belonging to each group.
