# Supplementary material for: Host-Diet Effect on the Metabolism of Bifidobacterium
Source: Genes (Basel). 2021 Apr 20;12(4):609. doi: 10.3390/genes12040609 (PMC8074910; doi:10.3390/genes12040609)
Supplement: Supplementary file 1 [file genes-12-00609-s001.zip › Supplementary Table S1.xlsx]

## Sheet: Table S1
Isolation Sources	Dietary Groups	Species	Specific host Information	Strains	GenBank Accession	Assembly Level	Genome Size Mb	GC Content %	CDS
Bat	Frugivore	B. vespertilionis	Egyptian fruit-bat (Rousettus aegyptiacus)	DSM 106025	RZOA00000000.1	Scaffold	3.07599	64.2	2409
		B. rousetti	Egyptian fruit-bat (Rousettus aegyptiacus)	DSM 106027	PEBH00000000.1	Scaffold	3.0538	64.6	2593
Geese	Herbivore	B. anseris	Domestic goose (Anser domesticus)	LMG 30189	NMYC00000000.1	Contig	2.16676	64.3	1718
Rabbit		B. cuniculi	Rabbit feces	LMG 10738	JGYV00000000.1	Contig	2.53159	64.9	2194
		B. magnum	Rabbit feces	LMG 11591	JGZB00000000.1	Contig	1.82248	58.7	1507
		B. pullorum subsp. saeculare	Rabbit feces	LMG 14934	JGZM00000000.1	Contig	2.26328	63.7	1857
		B. italicum	European rabbit (Oryctolagus cuniculus)	LMG 30187	MVOG00000000.1	Contig	2.27635	65.4	1772
Bovine rumen		B. merycicum	Rumens of Cattle	LMG 11341	JGZC00000000.1	Contig	2.28023	60.3	1740
		B. pseudolongum subsp. globosum	Bovine rumen	DSM 20092	CP017695.1	Contig	1.93525	63.4	1574
		B. ruminantium	Rumens of Cattle	LMG 21811	JGZL00000000.1	Contig	2.24981	59.2	1832
		B. boum	Rumens of Cattle	DSM 20432	JHWO00000000.1	Contig	2.16443	52.8	1726
Sloth		B. cholopei	Sloth	BRDM6	VYSG00000000.1	Scaffold	2.24866	65	1667
Rodent		B. castoris	European beaver (Castor fiber)	LMG 30937	QXGI00000000.1	Contig	2.49607	65.4	2064
		B. dolichotidis	Patagonian mara (Dolichotispatagonum)	LMG 30941	QXGM00000000.1	Contig	1.92171	50.4	1452
	Granivore	B. animalis subsp. animalis	Mouse	ATCC 25527	CP002567.1	Complete Genome	1.93269	60.5	1538
		B. tsurumiense	Golden hamsters dental plaque	JCM 13495	JGZU00000000.1	Contig	2.16443	52.8	1629
		B. criceti	European hamster (Cricetus cricetus)	LMG 30188	MVOH00000000.1	Contig	2.15588	62.5	1727
Chicken		B. pullorum subsp. gallinarum	Chicken cecum	LMG 11586	JGYX00000000.1	Contig	2.16084	64.2	1654
		B. pullorum subsp. pullorum	Chicken	DSM 20433	JDUI00000000.1	Contig	2.15356	64.2	1691
Non Human Primates	Exudativore	B. tissieri	Common marmosets (Callithrix jacchus)	DSM 100201	MWWV00000000.1	Contig	2.87348	61.1	2235
		B .reuteri	Common marmosets (Callithrix jacchus)	DSM 23975	JGZK00000000.1	Contig	2.84757	60.5	2149
		B. jachii	Common marmosets (Callithrix jacchus)	DSM 103362	RQSP00000000.1	Scaffold	2.8772	62.2	2040
		B. myosotis	Common marmosets (Callithrix jacchus)	DSM 100196	MWWW00000000.1	Contig	2.9442	62.6	2135
		B. catulorum	Common marmosets (Callithrix jacchus)	DSM 103154	QFFN00000000.1	Scaffold	2.61148	63.2	2041
		B. callitrichos	Common marmosets (Callithrix jacchus)	DSM 23973	JGYS00000000.1	Contig	2.88731	63.5	2364
		B. hapali	Common marmosets (Callithrix jacchus)	DSM 100202	MWWY00000000.1	Contig	2.83431	54.5	2136
		B. aesculapii	Common marmosets (Callithrix jacchus)	DSM 26737	BCFK00000000.1	Contig	2.69349	64.8	1924
	Frugivore eating insects	B. vansinderenii	Emperor tamarin (Saguinus imperator)	LMG 30126	NEWD00000000.1	Contig	3.11101	62.5	2497
		B. imperatoris	Emperor tamarin (Saguinus imperator)	LMG 30297	NMWV00000000.1	Contig	2.6399	56.1	2160
		B. callitrichidarum	Emperor tamarin (Saguinus imperator)	DSM 103152	QFFM00000000.1	Scaffold	3.12127	61.8	2548
		B. simiarum	Cotton top tamarin (Saguinus Oedipus) and emperor tamarin (Saguinus Imperator)	DSM 103153	PEBK00000000.1	Contig	2.72128	63.8	2118
		B. scaligerum	Cotton top tamarin (Saguinus Oedipus) and emperor tamarin (Saguinus Imperator)	DSM 103140	PGLQ00000000.1	Scaffold	2.65216	58.3	2091
		B. primatium	Cotton top tamarin (Saguinus Oedipus) and emperor tamarin (Saguinus Imperator)	DSM 100687	PEBI00000000.1	Scaffold	2.69677	63.2	2105
		B. felsineum	Cotton top tamarin (Saguinus Oedipus) and emperor tamarin (Saguinus Imperator)	DSM 103139	PEBJ00000000.1	Scaffold	2.38474	57.1	1893
		B. callimiconis	Goeldi's marmoset (Callimico goeldii)	LMG 30938	QXGJ00000000.1	Contig	2.9624	62.4	2297
		B. goeldii	Goeldi's marmoset (Callimico goeldii)	LMG 30939	QXGL00000000.1	Contig	2.60737	56.1	2055
		B. stellenboschense	Red-handed tamarind(Saguinus midas)	DSM 23968	JGZP00000000.1	Contig	2.81286	65.3	2203
		B. saguini	Red-handed tamarind(Saguinus midas)	DSM 23967	JGZN00000000.1	Contig	2.78704	56.4	2321
		B. biavatii	Red-handed tamarind(Saguinus midas)	DSM 23969	JGYN00000000.1	Contig	3.25215	63.1	2557
		B. platyrrhinorum	Squirrel monkey (Saimiri)	DSM 106029	WHZV00000000.1	Scaffold	2.28247	62.6	1953
		B. ramosum	Cotton top tamarin (Saguinus oedipus )	DSM 100688	WBSM00000000.1	Contig	3.04601	63.5	2334
		B. avesanii	Cotton top tamarin (Saguinus oedipus )	DSM 100685	WBSN00000000.1	Contig	2.68262	66.3	2091
		B. aerophilum	Cotton top tamarin (Saguinus oedipus )	DSM 100689	WHZW00000000.1	Scaffold	3.00092	63.6	2335
		B. simiasciurei	Squirrel monkey (Saimiri)	DSM 106020	WHZU00000000.1	Scaffold	2.7625	63.6	2141
	Gummivore	B. parmae	Pygmy marmoset (Callithrix pygmaea)	LMG 30295	NMWT00000000.1	Contig	2.82021	65.8	2237
		B. margollesii	Pygmy marmoset (Callithrix pygmaea)	LMG 30296	NMWU00000000.1	Contig	2.78939	61.9	2221
	Opportunistic omnivore eating insects and fruits	B. lemurum	Ring-tailed lemur (Lemur catta)	DSM 28807	MWWX00000000.1	Contig	2.91202	62.6	2211
		B. samirii	Black-capped squirrel monkey (Saimiri boliviensis)	LMG 30940	QXGK00000000.1	Contig	2.57463	66.6	2013
		B. eulemuris	Adult black lemurs ( Eulemur macaco)	DSM 100216	MWWZ00000000.1	Contig	2.91339	62.2	2315
		B. moukalabense	Wild lowland gorilla (Gorilla gorilla gorilla)	DSM 27321	AZMV00000000.1	Contig	2.51533	59.9	2046
Pig	Omnivore	B. choerinum	Piglet faeces	LMG 10510	JGYU00000000.1	Contig	2.09612	65.5	1672
		B. pseudolongum subsp. pseudolongum	Pig faeces	LMG 11571	JGZH00000000.1	Contig	1.89868	63.1	1495
		B. longum subsp. suis	Pig faeces	DSM 20211	JDUC00000000.1	Scaffold	2.60288	59.9	2032
		B. thermacidophilum subsp. porcinum	Piglet faeces	DSM 17755	JDTQ01000001.1	Contig	2.07937	60.2	1738
		B. thermophilum	Human Adult	JCM 1207	JGZV00000000.1	Complete Genome	2.29164	60.1	1845
Human Adult		B. adolescentis	Human Adult	ATCC 15703	AP009256.1	Complete Genome	2.08964	59.2	1631
		B. angulatum	Human Adult	DSM 20098	AP012322.1	Complete Genome	2.02197	59.4	1585
		B. dentium	Human Adult	LMG 20436	AP012326.1	Complete Genome	2.63567	58.5	2141
		B. gallicum	Human Adult	LMG 11596	JGYW00000000.1	Contig	2.00459	57.6	1507
		B. longum subsp. longum	Human Adult	JCM 1217	AP010888.1	Complete Genome	2.38516	60.3	1924
		B. scardovii	Human Adult	DSM 13734	AP012331.1	Complete Genome	3.15835	64.6	2572
Human Infant	Infant food	B. bifidum	Human Infant	ATCC 29521	AP012323.1	Complete Genome	2.21466	62.7	1707
		B. breve	Human Infant	DSM 20213	AP012324.1	Complete Genome	2.26941	58.9	1929
		B. catenulatum subsp. catenulatum	Human Infant	LMG 11043	AP012325.1	Complete Genome	2.07952	56.2	1710
		B. catenulatum subsp. kashiwanohense	Human Infant	DSM 21854	AP012327.1	Complete Genome	2.33723	56.3	1945
		B. longum subsp. infantis	Human Infant	DSM 20088	CP001095.1	Complete Genome	2.83275	59.9	2416
		B. pseudocatenulatum	Human Infant	LMG 10505	AP012330.1	Complete Genome	2.31375	56.4	1841
Fermented Products	Fermented food	B. aquikefiry	Fermented Products	LMG 28769	MWXA00000000.1	Contig	2.40836	52.3	1982
		B. crudilactis	Fermented Products	LMG 23609	JHAL00000000.1	Contig	2.36282	57.7	1800
		B. mongoliense	Fermented Products	DSM 21395	JGZE00000000.1	Contig	2.17049	62.8	1798
		B. psycraerophilum	Fermented Products	LMG 21775	JGZI00000000.1	Contig	2.61508	58.8	2122
Commercially used probiotic	Commercial probiotic	B. animalis subsp. lactis	Commercial probiotic	DSM 10140	CP001606.1	Complete Genome	1.93848	60.5	1566
Bees	Nectarivore and palynivore	B. actinocoloniiforme	Bumble bees	DSM 22766	CP011786.1	Complete Genome	1.83006	62.7	1296
		B. asteroides	Honey bees	DSM 20089	CP017696.1	Complete Genome	2.1673	60.1	1659
		B. bohemicum	Bumble bees	DSM 22767	JGYP00000000.1	Contig	2.05247	57.5	1632
		B. bombi	Bumble bees	DSM 19703	ATLK00000000.1	Contig	1.89524	56.1	1454
		B. coryneforme	Honey bees	LMG18911	CP007287.1	Complete Genome	1.75515	60.5	1364
		B. commune	Bumble bees	DSM 28792	FMBL00000000.1	Scaffold	1.63366	53.9	1238
		B. indicum	Honey bees	LMG 11587	CP006018.1	Complete Genome	1.73455	60.5	1350
		B. xylocopae	Carpenter bee	LMG 30142	PDCH00000000.1	Contig	1.84846	62.8	1476
		B. aemilianum	Carpenter bee	LMG 30143	PDCG00000000.1	Contig	2.01758	61.1	1640
Sewage	Sewage	B. minimum	Sewage	LMG 11592	JGZD00000000.1	Contig	1.89286	62.7	1590
		B. subtile	Sewage	LMG 11597	JGZR00000000.1	Contig	2.79009	60.9	2260
		B. thermacidophilum subsp. thermacidophilum	Sewage	LMG 15837	AUFI00000000.1	Contig	2.23307	60.4	1824
