# Supplementary material for: Host-Diet Effect on the Metabolism of Bifidobacterium
Source: Genes (Basel). 2021 Apr 20;12(4):609. doi: 10.3390/genes12040609 (PMC8074910; doi:10.3390/genes12040609)
Supplement: Supplementary file 1 [file genes-12-00609-s001.zip › Supplementary Table S2.xlsx]

## Sheet: Table S2
Serial Number	Specie Name	Strain Name	Isolation Source	GenBank Accession
1	B. animalis subsp. lactis	CNCM I2494	Dairy product	CP002915.1
2	B. animalis subsp. lactis	BLC1	Probiotic	CP003039.1
3	B. animalis subsp. lactis	B420	Human	CP003497.1
4	B. animalis subsp. lactis	Bl12	Human	CP004053.1
5	B. animalis subsp. lactis	ATCC27673	Sewage	CP003941.1
6	B. animalis subsp. lactis	ATCC27536	Chicken	AWFL00000000.1
7	B. animalis subsp. animalis	IM386	Human	CBUQ000000000.1
8	B. animalis subsp. animalis	MCC1489	Pig	AWFO00000000.1
9	B. animalis subsp. animalis	MCC0483	Rodent	AWFK00000000.1
10	B. animalis subsp. animalis	ATCC27672	Rodent	AWFQ00000000.1
11	B. animalis subsp. animalis	YL2	Rodent	NHMR00000000.2
12	B. longum subsp. infantis	BIC1307292462	Probiotic	CCWO00000000.1
13	B. longum subsp. infantis	BIC1401212621b	Probiotic	CCWS00000000.1
14	B. longum subsp. infantis	BT1	Infant	CP010411.1
15	B. longum subsp. infantis	CECT 7210	Infant	CELR00000000.1
16	B. longum subsp. suis	VT155	Calf	SAMN17849156
17	B. longum subsp. suis	VT247	Calf	SAMN17849157
18	B. longum subsp. suis	SU851	Pig	WHVJ00000000
19	B. longum subsp. suis	LMG 21814	Pig	JGZA00000000.1
20	B. longum subsp. suis	DSM 20211	Pig	JDUC00000000.1
21	B. longum subsp. suis	BSM11-5	Infant	MOAE00000000.1
22	B. breve	B7212	Human	SAMN17849159
23	B. breve	B2150	Infant	SAMN17849160
24	B. breve	JCM 7019	Human	CP006713.1
25	B. breve	ACS-71-V-Sch8b	Human	CP002743.1
26	B. breve	CECT 7263	human milk	AFVV00000000.1
27	B. breve	S27	Infant	CP006716.1
28	B. breve	DSM 20213	Infant	ACCG00000000.2
29	B. breve	UCC2003	Infant	CP000303.1
30	B. bifidum	B7298	Human	SAMN17849161
31	B. bifidum	B2662	Infant	SAMN17849162
32	B. bifidum	VT188	Calf	SAMN17849163
33	B. bifidum	B2009	Infant	SAMN17849164
34	B. bifidum	B7313	Human	SAMN17849165
35	B. thermophilum	RBL67	Human	CP004346.1
36	B. thermophilum	DSM20212	Bovine	JHWM00000000.1
37	B. thermophilum	JCM1207	Pig	JGZV00000000.1
38	B. thermophilum	DSM20210	Pig	JDUB00000000.1
39	B. thermophilum	1543B	Pig	PCGX00000000.1
40	B. thermophilum	1542B	Pig	PCGY00000000.1
41	B. adolescentis	22L	Human	CP007443.1
42	B. adolescentis	BBMN23	Human	CP010437.1
43	B. adolescentis	LMG11579	Bos taurus	LNKL00000000.1
44	B. adolescentis	UBA2084	Sewage	DCZM00000000.1
45	B. pseudocatenulatum	IPLA36007	Human	JEOD00000000.1
46	B. pseudocatenulatum	1E	Calf	MNLB00000000.1
47	B. pseudocatenulatum	12	Human	CP025199.1
48	B. pseudolongum subsp. globosum	LMG11569	Bos taurus	JGZG00000000.1
49	B. pseudolongum subsp. globosum	DSM20092	Bovine	CP017695.1
50	B. pseudolongum subsp. globosum	1744B	Bear	PCHB00000000.1
51	B. pseudolongum subsp. globosum	1619B	Llama	PCHC00000000.1
52	B. pseudolongum subsp. globosum	1549B	Chicken	PCHG00000000.1
53	B. pseudolongum subsp. globosum	1520B	Rodent	PCHH00000000.1
54	B. pseudolongum subsp. globosum	1524B	Rodent	PCGZ00000000.1
55	B. pseudolongum subsp. globosum	1747B	Giraffe	PCHA00000000.1
56	B. pseudolongum subsp. globosum	1734B	Wallaby	PCHD00000000.1
57	B. pseudolongum subsp. globosum	1691B	Hippopotamus	PCHE00000000.1
58	B. pseudolongum subsp. pseudolongum	1370B	Pig	PCHI00000000.1
59	B. pseudolongum subsp. pseudolongum	2054B	Dog	RYUN00000000.1
60	B. pseudolongum subsp. pseudolongum	1629B	Tapir	RYVE00000000.1
61	B. moukalabense	GG01	Western Lowland Gorilla	BJEZ00000000.1
62	B. moukalabense	GB01	Western Lowland Gorilla	BJFA00000000.1
63	B. moukalabense	CD14	Chimpanzee central	BJFG00000000.1
64	B. moukalabense	CD16	Chimpanzee central	BJFH00000000.1
65	B. moukalabense	EB43	African forest elephant	BJFJ00000000.1
66	B. moukalabense	EB44	African forest elephant	BJFK00000000.1
