# Supplementary material for: Host-Diet Effect on the Metabolism of Bifidobacterium
Source: Genes (Basel). 2021 Apr 20;12(4):609. doi: 10.3390/genes12040609 (PMC8074910; doi:10.3390/genes12040609)
Supplement: Supplementary file 1 [file genes-12-00609-s001.zip › Supplementary Table S3.xlsx]

## Sheet: Table S3
Specie Name	Strain Name	Isolation Source	GenBank Accession	GenBank Assembly Accession
Bifidobacterium animalis subsp. lactis	ATCC 27536	Chicken	AWFL00000000.1	GCF_001263975.1
Bifidobacterium animalis subsp. lactis	1821B	Chimpanzee	RSCT00000000.1	GCF_004154435.1
Bifidobacterium animalis subsp. lactis	1869B	Chimpanzee	RSCR00000000.1	GCF_004154445.1
Bifidobacterium animalis subsp. lactis	1813B	Chimpanzee	RSCU00000000.1	GCF_004154525.1
Bifidobacterium animalis subsp. lactis	DS23_2	Commercial dietary supplements	QDIO00000000.1	GCF_003094835.1
Bifidobacterium animalis subsp. lactis	CF3_2	Cultured Food	QDIV00000000.1	GCF_003094915.1
Bifidobacterium animalis subsp. lactis	BM 25	dairy product	PHUS00000000.1	GCF_002803775.1
Bifidobacterium animalis subsp. lactis	2010B	Dog	RSCP00000000.1	GCF_004154425.1
Bifidobacterium animalis subsp. lactis	2011B	Dog	RSCO00000000.1	GCF_004154455.1
Bifidobacterium animalis subsp. lactis	2007B	Dog	RSCQ00000000.1	GCF_004154645.1
Bifidobacterium animalis subsp. lactis	UBBLa 70	fermented food	RWKO00000000.1	GCF_003970855.1
Bifidobacterium animalis subsp. lactis	BB-12	Food product	PESQ00000000.1	GCF_000025245.1
Bifidobacterium animalis subsp. lactis	ATCC 27673	Food product	CP003941.1	GCF_000471945.1
Bifidobacterium animalis subsp. lactis	ATCC 27673	Food product	AWFP00000000.1	GCF_001264015.1
Bifidobacterium animalis subsp. lactis	LMG P-17502_1	Food product	NIGR00000000.1	GCF_002914815.1
Bifidobacterium animalis subsp. lactis	LMG P-17502_2	Food product	NIGQ00000000.1	GCF_002914895.1
Bifidobacterium animalis subsp. lactis	AD011	Human	CP001213.1	GCF_000021425.1
Bifidobacterium animalis subsp. lactis	Bl-04; ATCC SD5219	Human	CP001515.1	GCF_000022705.1
Bifidobacterium animalis subsp. lactis	DSM 10140	Human	CP001606.1	GCF_000022965.1
Bifidobacterium animalis subsp. lactis	V9	Human	CP001892.1	GCF_000092765.1
Bifidobacterium animalis subsp. lactis	HN019	Human	ABOT00000000.1	GCF_000172535.1
Bifidobacterium animalis subsp. lactis	CNCM I-2494	Human	CP002915.1	GCF_000220885.1
Bifidobacterium animalis subsp. lactis	BLC1	Human	CP003039.1	GCF_000224965.2
Bifidobacterium animalis subsp. lactis	BS 01	Human	AHGW00000000.1	GCF_000240765.1
Bifidobacterium animalis subsp. lactis	B420	Human	CP003497.1	GCF_000277325.1
Bifidobacterium animalis subsp. lactis	Bi-07	Human	CP003498.1	GCF_000277345.1
Bifidobacterium animalis subsp. lactis	Bl12	Human	CP004053.1	GCF_000414215.1
Bifidobacterium animalis subsp. lactis	CECT 8145	Human	CBWX000000000.1	GCF_000612705.1
Bifidobacterium animalis subsp. lactis	KLDS2.0603	Human	CP007522.1	GCF_000816205.1
Bifidobacterium animalis subsp. lactis	BF052	Human	CP009045.1	GCF_000818055.1
Bifidobacterium animalis subsp. lactis	S646	Human	MLZL00000000.1	GCF_001892925.1
Bifidobacterium animalis subsp. lactis	DS27_2	Human	QDIL00000000.1	GCF_003094775.1
Bifidobacterium animalis subsp. lactis	DS24_2	Human	QDIN00000000.1	GCF_003094815.1
Bifidobacterium animalis subsp. lactis	DS28_2	Human	QDIK00000000.1	GCF_003095015.1
Bifidobacterium animalis subsp. lactis	S7	Human	CP022724.1	GCF_003390755.1
Bifidobacterium animalis subsp. lactis	HN019	Human	CP031154.1	GCF_003606305.1
Bifidobacterium animalis subsp. lactis	IDCC4301	Infant	CP031703.1	GCF_003428375.1
Bifidobacterium animalis subsp. lactis	1843B	Marmoset	RSCS00000000.1	GCF_004154475.1
Bifidobacterium animalis subsp. lactis	1316B	Pheasant	RSDA00000000.1	GCF_004154565.1
Bifidobacterium animalis subsp. lactis	1802B	Pheasant	RSCX00000000.1	GCF_004154655.1
Bifidobacterium animalis subsp. lactis	1528B	Pig	RSCY00000000.1	GCF_004154555.1
Bifidobacterium animalis subsp. lactis	ATCC 27674	Rabbit	AWFM00000000.1	GCF_001263985.1
Bifidobacterium animalis subsp. lactis	1395B	Rabbit	RSCZ00000000.1	GCF_004154695.1
Bifidobacterium animalis subsp. lactis	1811B	Vervet	RSCV00000000.1	GCF_004154535.1
Bifidobacterium animalis subsp. lactis	1808B	Vervet	RSCW00000000.1	GCF_004154545.1
