# Supplementary material for: Host-Diet Effect on the Metabolism of Bifidobacterium
Source: Genes (Basel). 2021 Apr 20;12(4):609. doi: 10.3390/genes12040609 (PMC8074910; doi:10.3390/genes12040609)
Supplement: Supplementary file 1 [file genes-12-00609-s001.zip › Supplementary Table S5.xlsx]

## Sheet: All
Genome Name	Host	Strain	Accesssion	GH1	GH10	GH101	GH105	GH109	GH110	GH112	GH120	GH121	GH123	GH125	GH127	GH129	GH13	GH136	GH140	GH146	GH151	GH154	GH163	GH16	GH18	GH2	GH20	GH23	GH25	GH26	GH27	GH29	GH3	GH30	GH31	GH32	GH33	GH35	GH36	GH38	GH42	GH43	GH49	GH5	GH51	GH53	GH55	GH59	GH65
B. animalis subsp. animalis	Human	RH	GCF_000695895.1	1	0	0	0	0	0	0	0	0	0	0	1	0	12	2	0	0	0	0	0	0	0	2	0	0	2	0	3	0	0	2	0	1	0	0	0	0	2	3	0	1	1	0	0	0	0
B. animalis subsp. animalis	Human	A6	GCF_000817045.1	1	0	0	0	0	0	0	0	0	0	0	1	0	13	0	0	0	0	0	0	0	0	2	0	0	2	0	3	0	0	2	0	1	0	0	2	0	2	3	0	1	1	0	0	0	0
B. animalis subsp. animalis	Human	TF04-14	GCF_003438565.1	1	0	0	0	0	0	0	0	0	0	0	1	0	12	0	0	0	0	0	0	0	0	2	0	0	2	0	3	0	0	2	0	1	0	0	2	0	2	3	0	1	1	0	0	0	0
B. animalis subsp. animalis	Human	OM05-7AA	GCF_003438945.1	1	0	0	0	0	0	0	0	0	0	0	1	0	12	0	0	0	0	0	0	0	0	2	0	0	2	0	3	0	0	2	0	1	0	0	2	0	2	3	0	1	1	0	0	0	0
B. animalis subsp. animalis	Human	S1	GCF_004135895.1	1	0	0	0	0	0	0	0	0	0	0	1	0	12	0	0	0	0	0	0	0	0	2	0	0	2	0	3	0	0	2	0	1	0	0	2	0	2	3	0	1	1	0	0	0	0
B. animalis subsp. animalis	Human	co_0103	GCF_004167905.1	1	0	0	0	0	0	0	0	0	0	0	1	0	12	0	0	0	0	0	0	0	0	2	0	0	2	0	3	0	0	2	0	1	0	0	2	0	2	3	0	1	1	0	0	0	0
B. animalis subsp. animalis	Human	BSD2780061688st1_E5	GCF_005844245.1	1	0	0	0	0	0	0	0	0	0	0	1	0	12	0	0	0	0	0	0	0	0	2	0	0	2	0	3	0	0	2	0	1	0	0	2	0	2	3	0	1	1	0	0	0	0
B. animalis subsp. animalis	Human	J063	GCF_006538245.1	1	0	0	0	0	0	0	0	0	0	0	1	0	12	0	0	0	0	0	0	0	0	2	0	0	2	0	3	0	0	2	0	1	0	0	2	0	2	3	0	1	1	0	0	0	0
B. animalis subsp. animalis	Human	J218	GCF_006538265.1	1	0	0	0	0	0	0	0	0	0	0	1	0	12	0	0	0	0	0	0	0	0	2	0	0	2	0	3	0	0	2	0	1	0	0	2	0	2	3	0	1	1	0	0	0	0
B. animalis subsp. animalis	Human	J231	GCF_006538285.1	1	0	0	0	0	0	0	0	0	0	0	1	0	12	0	0	0	0	0	0	0	0	2	0	0	2	0	3	0	0	2	0	1	0	0	2	0	2	3	0	1	1	0	0	0	0
B. animalis subsp. animalis	Human	B06	GCF_008041995.1	1	0	0	0	0	0	0	0	0	0	0	1	0	13	0	0	0	0	0	0	0	0	2	0	0	2	0	3	0	0	2	0	1	0	0	2	0	2	3	0	1	1	0	0	0	0
B. animalis subsp. animalis	Human	BIOML-A2	GCF_009075805.1	1	0	0	0	0	0	0	0	0	0	0	1	0	12	0	0	0	0	0	0	0	0	2	0	0	2	0	3	0	0	2	0	1	0	0	2	0	2	3	0	1	1	0	0	0	0
B. animalis subsp. animalis	Human	BIOML-A3	GCF_009075825.1	1	0	0	0	0	0	0	0	0	0	0	1	0	12	0	0	0	0	0	0	0	0	2	0	0	2	0	3	0	0	2	0	1	0	0	2	0	2	3	0	1	1	0	0	0	0
B. animalis subsp. animalis	Human	BIOML-A1	GCF_009077835.1	1	0	0	0	0	0	0	0	0	0	0	1	0	12	0	0	0	0	0	0	0	0	2	0	0	2	0	3	0	0	2	0	1	0	0	2	0	2	3	0	1	1	0	0	0	0
B. animalis subsp. animalis	Human	MGYG-HGUT-02459	GCF_902387355.1	1	0	0	0	0	0	0	0	0	0	0	1	0	13	0	0	0	0	0	0	0	0	2	0	0	2	0	3	0	0	2	0	1	0	0	2	0	2	3	0	1	1	0	0	0	0
B. animalis subsp. animalis	Human	CNCM I-4602	GCF_003671995.1	1	0	0	0	0	0	0	0	0	0	0	0	0	11	0	0	0	0	0	0	0	0	2	0	0	1	0	2	0	0	1	0	1	0	0	2	0	0	3	0	1	1	0	0	0	0
B. animalis subsp. animalis	Human	IM386	GCF_001039715.1	1	0	0	0	0	0	0	0	0	0	0	0	0	11	0	0	0	0	0	0	0	0	2	0	0	1	0	2	0	0	1	0	1	0	0	2	0	0	3	0	1	1	0	0	0	0
B. animalis subsp. animalis	Blood	Bifido_08	GCF_900157045.1	1	0	0	0	0	0	0	0	0	0	0	1	0	12	0	0	0	0	0	0	0	0	2	0	0	2	0	3	0	0	2	0	1	0	0	2	0	2	3	0	1	1	0	0	0	0
B. animalis subsp. animalis	Blood	Bifido_11	GCF_900157135.1	1	0	0	0	0	0	0	0	0	0	0	1	0	12	0	0	0	0	0	0	0	0	2	0	0	2	0	3	0	0	2	0	1	0	0	2	0	2	3	0	1	1	0	0	0	0
B. animalis subsp. animalis	Commercial dietary supplements	BL3	GCF_002220485.1	1	0	0	0	0	0	0	0	0	0	0	1	0	13	0	0	0	0	0	0	0	0	2	0	0	2	0	3	0	0	2	0	1	0	0	2	0	2	3	0	1	1	0	0	0	0
B. animalis subsp. animalis	Commercial dietary supplements	DS15_2	GCF_003094875.1	1	0	0	0	0	0	0	0	0	0	0	1	0	12	0	0	0	0	0	0	0	0	2	0	0	2	0	3	0	0	2	0	1	0	0	2	0	2	3	0	1	1	0	0	0	0
B. animalis subsp. animalis	Commercial dietary supplements	DS11_2	GCF_003094895.1	1	0	0	0	0	0	0	0	0	0	0	1	0	12	0	0	0	0	0	0	0	0	2	0	0	2	0	3	0	0	2	0	1	0	0	2	0	2	3	0	1	1	0	0	0	0
B. animalis subsp. animalis	Commercial dietary supplements	DS20_2	GCF_003095055.1	1	0	0	0	0	0	0	0	0	0	0	1	0	12	0	0	0	0	0	0	0	0	2	0	0	2	0	3	0	0	2	0	1	0	0	2	0	2	3	0	1	1	0	0	0	0
B. animalis subsp. animalis	Commercial dietary supplements	DS2_2	GCF_003095075.1	1	0	0	0	0	0	0	0	0	0	0	1	0	12	0	0	0	0	0	0	0	0	2	0	0	2	0	3	0	0	2	0	1	0	0	2	0	2	3	0	1	1	0	0	0	0
B. animalis subsp. animalis	Commercial dietary supplements	DS1_2	GCF_003095115.1	1	0	0	0	0	0	0	0	0	0	0	1	0	12	0	0	0	0	0	0	0	0	2	0	0	2	0	3	0	0	2	0	1	0	0	2	0	2	3	0	1	1	0	0	0	0
B. animalis subsp. animalis	Dog	2006B	GCF_004154625.1	1	0	0	0	0	0	0	0	0	0	0	1	0	12	0	0	0	0	0	0	0	0	3	0	0	1	1	3	0	0	2	1	1	0	0	3	0	3	3	0	2	1	0	0	0	0
B. animalis subsp. animalis	Pig	MCC 1489	GCF_001263835.1	1	0	0	0	0	0	0	0	0	0	0	0	0	9	0	0	0	0	0	0	0	0	2	0	0	1	0	1	0	0	1	0	1	0	0	2	0	0	3	0	1	1	0	0	0	0
B. animalis subsp. animalis	Rodent	LMG 10508	GCF_000741485.1	1	0	0	0	0	0	0	0	0	0	0	0	0	10	0	0	0	0	0	0	0	0	2	0	0	1	0	2	0	0	1	0	1	0	0	2	0	0	3	0	1	1	0	0	0	0
B. animalis subsp. animalis	Rodent	YL2_1	GCF_001688645.2	1	0	0	0	0	0	0	0	0	0	0	1	0	10	0	0	0	0	0	0	0	0	2	0	1	2	0	2	0	0	1	0	1	0	0	2	0	2	3	0	1	1	0	0	0	0
B. animalis subsp. animalis	Rodent	YL2_2	GCF_002221565.2	1	0	0	0	0	0	0	0	0	0	0	1	0	11	0	0	0	0	0	0	0	0	2	0	1	2	0	2	0	0	1	0	1	0	0	2	0	2	3	0	1	1	0	0	0	0
B. animalis subsp. animalis	Rodent	ATCC 27672	GCF_001264055.1	1	0	0	0	0	0	1	0	0	0	0	0	0	9	1	0	0	0	0	0	0	0	3	0	0	2	1	1	0	0	1	0	1	0	0	3	0	2	4	0	1	1	0	0	0	0
B. animalis subsp. animalis	Rodent	MCC 0483	GCF_001263945.1	1	0	0	0	0	0	1	0	0	0	0	0	0	9	1	0	0	0	0	0	0	0	2	0	0	2	1	0	0	0	1	0	1	0	0	2	0	2	3	0	1	1	0	0	0	0
B. animalis subsp. animalis	Rodent	MCC 0499	GCF_001263865.1	1	0	0	0	0	0	1	0	0	0	0	0	0	9	1	0	0	0	0	0	0	0	2	0	0	4	0	1	0	0	1	0	1	0	0	2	0	0	2	0	1	1	0	0	0	0
B. animalis subsp. animalis		Probio-M8	GCF_011770105.1	1	0	0	0	0	0	0	0	0	0	0	1	0	13	0	0	0	0	0	0	0	0	2	0	0	2	0	3	0	0	2	0	1	0	0	2	0	2	3	0	1	1	0	0	0	0
B. animalis subsp. animalis		ATCC 25527	GCF_000260715.1	1	0	0	0	0	0	0	0	0	0	0	0	0	11	0	0	0	0	0	0	0	0	2	0	0	1	0	2	0	0	1	0	1	0	0	2	0	0	3	1	1	1	0	0	0	0
B. animalis subsp. lactis	Human	MN-Gup	GCF_009834975.1	1	0	0	0	0	0	0	0	0	0	0	1	0	12	0	0	0	0	0	0	0	0	2	0	0	2	0	3	0	0	2	0	1	0	0	2	0	2	3	0	1	1	0	0	0	0
B. animalis subsp. lactis	Human	KLDS2.0603	GCA_000816205.1	1	0	0	0	0	0	0	0	0	0	0	1	0	12	0	0	0	0	0	0	0	0	2	0	0	2	0	3	0	0	2	0	1	0	0	2	0	2	3	0	1	1	0	0	0	0
B. animalis subsp. lactis	Human	646	GCA_001892925.1	1	0	0	0	0	0	0	0	0	0	0	1	0	12	0	0	0	0	0	0	0	0	2	0	0	2	0	3	0	0	2	0	1	0	0	2	0	2	3	0	1	1	0	0	0	0
B. animalis subsp. lactis	Human	S7	GCA_003390755.1	1	0	0	0	0	0	0	0	0	0	0	1	0	13	0	0	0	0	0	0	0	0	2	0	0	2	0	3	0	0	2	0	1	0	0	2	0	2	3	0	1	1	0	0	0	0
B. animalis subsp. lactis	Infant	BF052	GCA_000818055.1	1	0	0	0	0	0	0	0	0	0	0	1	0	12	0	0	0	0	0	0	0	0	2	0	0	2	0	3	0	0	2	0	1	0	0	2	0	2	3	0	1	1	0	0	0	0
B. animalis subsp. lactis	Infant	IDCC4301	GCA_003428375.1	1	0	0	0	0	0	0	0	0	0	0	1	0	13	0	0	0	0	0	0	0	0	2	0	0	2	0	3	0	0	2	0	1	0	0	2	0	2	3	0	1	1	0	0	0	0
B. animalis subsp. lactis	Human Milk	BIO5764	GCF_008868455.1	1	0	0	0	0	0	0	0	0	0	0	1	0	12	0	0	0	0	0	0	0	0	1	0	0	2	0	3	0	0	2	0	1	0	0	2	0	2	3	0	1	1	0	0	0	0
B. animalis subsp. lactis	Food product - supplement	LMG P-17502_2	GCF_002914895.1	1	0	0	0	0	0	0	0	0	0	0	1	0	12	0	0	0	0	0	0	0	0	2	0	0	2	0	3	0	0	2	0	1	0	0	2	0	2	3	0	1	1	0	0	0	0
B. animalis subsp. lactis	Commercial dietary supplements	DS27_2	GCF_003094775.1	1	0	0	0	0	0	0	0	0	0	0	1	0	12	0	0	0	0	0	0	0	0	2	0	0	2	0	3	0	0	2	0	1	0	0	2	0	2	3	0	1	1	0	0	0	0
B. animalis subsp. lactis	Commercial dietary supplements	DS24_2	GCF_003094815.1	1	0	0	0	0	0	0	0	0	0	0	1	0	12	0	0	0	0	0	0	0	0	2	0	0	2	0	3	0	0	2	0	1	0	0	2	0	2	3	0	1	1	0	0	0	0
B. animalis subsp. lactis	Commercial dietary supplements	DS23_2	GCA_003094835.1	1	0	0	0	0	0	0	0	0	0	0	1	0	11	0	0	0	0	0	0	0	0	2	0	0	2	0	3	0	0	2	0	1	0	0	2	0	2	3	0	1	1	0	0	0	0
B. animalis subsp. lactis	Cultured Food	CF3_2	GCA_003094915.1	1	0	0	0	0	0	0	0	0	0	0	1	0	12	0	0	0	0	0	0	0	0	1	0	0	1	0	3	0	0	2	0	1	0	0	2	0	2	3	0	1	1	0	0	0	0
B. animalis subsp. lactis	Food product - supplement	LMG P-17502_1	GCA_002914815.1	1	0	0	0	0	0	0	0	0	0	0	1	0	12	0	0	0	0	0	0	0	0	2	0	0	2	0	3	0	0	2	0	1	0	0	2	0	2	3	0	1	1	0	0	0	0
B. animalis subsp. lactis	Food product - supplement	LMG P-17502_2	GCA_002914895.1	1	0	0	0	0	0	0	0	0	0	0	1	0	13	0	0	0	0	0	0	0	0	2	0	0	2	0	3	0	0	2	0	1	0	0	2	0	2	3	0	1	1	0	0	0	0
B. animalis subsp. lactis	Commercial dietary supplements	DS27_2	GCA_003094775.1	1	0	0	0	0	0	0	0	0	0	0	1	0	12	0	0	0	0	0	0	0	0	2	0	0	2	0	3	0	0	2	0	1	0	0	2	0	2	3	0	1	1	0	0	0	0
B. animalis subsp. lactis	Commercial dietary supplements	DS24_2	GCA_003094815.1	1	0	0	0	0	0	0	0	0	0	0	1	0	12	0	0	0	0	0	0	0	0	2	0	0	2	0	3	0	0	2	0	1	0	0	2	0	2	3	0	1	1	0	0	0	0
B. animalis subsp. lactis	Commercial dietary supplements	DS28_2	GCA_003095015.1	1	0	0	0	0	0	0	0	0	0	0	1	0	12	0	0	0	0	0	0	0	0	2	0	0	2	0	3	0	0	2	0	1	0	0	2	0	2	3	0	1	1	0	0	0	0
B. animalis subsp. lactis	Microbial food product	HN019	GCA_003606305.1	1	0	0	0	0	0	0	0	0	0	0	1	0	13	0	0	0	0	0	0	0	0	2	0	0	2	0	3	0	0	2	0	1	0	0	2	0	2	3	0	1	1	0	0	0	0
B. animalis subsp. lactis	Fermented food	UBBLa 70	GCA_003970855.1	1	0	0	0	0	0	0	0	0	0	0	1	0	12	0	0	0	0	0	0	0	0	2	0	0	2	0	3	0	0	2	0	1	0	0	2	0	2	3	0	1	1	0	0	0	0
B. animalis subsp. lactis	Dog	2011B	GCA_004154455.1	1	0	0	0	0	0	1	0	0	0	0	0	0	11	1	0	0	0	0	0	0	0	3	1	0	2	1	3	0	0	1	0	1	0	0	3	2	2	3	0	3	1	0	0	0	0
B. animalis subsp. lactis	Dog	2007B	GCA_004154645.1	1	0	0	0	0	0	1	0	0	0	0	1	0	12	1	0	0	0	0	0	0	0	2	1	0	1	0	3	0	0	0	0	1	0	0	2	2	2	3	0	2	1	0	0	0	0
B. animalis subsp. lactis	Dog	1821B	GCA_004154435.1	1	0	0	0	0	0	0	0	0	0	0	1	0	12	0	0	0	0	0	0	0	0	2	0	0	2	0	3	0	0	2	0	1	0	0	2	0	2	3	0	1	1	0	0	0	0
B. animalis subsp. lactis	Pig	1528B	GCA_004154555.1	1	1	0	0	0	0	0	0	0	0	0	1	0	12	0	0	0	0	0	0	0	0	3	0	0	3	1	2	0	0	1	0	1	0	0	3	0	2	3	0	2	1	0	0	0	0
B. animalis subsp. lactis	Chimpanzee	1869B	GCA_004154445.1	1	0	0	0	0	0	0	0	0	0	0	1	0	12	0	0	0	0	0	0	0	0	2	0	0	2	0	3	0	0	2	0	1	0	0	2	0	2	3	0	1	1	0	0	0	0
B. animalis subsp. lactis	Chimpanzee	1813B	GCA_004154525.1	1	0	0	0	0	0	0	0	0	0	0	1	0	12	0	0	0	0	0	0	0	0	2	0	0	2	0	3	0	0	2	0	1	0	0	2	0	2	3	0	1	1	0	0	0	0
B. animalis subsp. lactis	Chimpanzee	1843B	GCA_004154475.1	1	0	0	0	0	0	0	0	0	0	0	1	0	12	0	0	0	0	0	0	0	0	2	0	0	2	0	3	0	0	2	0	1	0	0	2	0	2	3	0	1	1	0	0	0	0
B. animalis subsp. lactis	Macaque	1802B	GCA_004154655.1	1	0	0	0	0	0	0	0	0	0	0	1	0	12	0	0	0	0	0	0	0	0	2	0	0	2	0	3	0	0	2	0	1	0	0	2	0	2	3	0	1	1	0	0	0	0
B. animalis subsp. lactis	Vervet monkey	1811B	GCA_004154535.1	1	0	0	0	0	0	0	0	0	0	0	1	0	12	0	0	0	0	0	0	0	0	2	0	0	2	0	3	0	0	2	0	1	0	0	2	0	2	3	0	1	1	0	0	0	0
B. animalis subsp. lactis	Vervet monkey	1808B	GCA_004154545.1	1	0	0	0	0	0	0	0	0	0	0	1	0	12	0	0	0	0	0	0	0	0	2	0	0	2	0	3	0	0	2	0	1	0	0	2	0	2	3	0	1	1	0	0	0	0
B. animalis subsp. lactis	Pheasant	1316B	GCA_004154565.1	1	0	0	0	0	0	0	0	0	0	0	1	0	12	0	0	0	0	0	0	0	0	2	0	0	2	0	3	0	0	2	0	1	0	0	2	0	2	3	0	1	1	0	0	0	0
B. animalis subsp. lactis	Rabbit	ATCC 27674	GCA_001263985.1	1	0	0	0	0	0	0	0	0	0	0	1	0	12	0	0	0	0	0	0	0	0	2	0	0	2	0	3	0	0	2	0	1	0	0	2	0	2	3	0	1	1	0	0	0	0
B. animalis subsp. lactis	Rabbit	1395B	GCA_004154695.1	1	0	0	0	0	0	0	0	0	0	0	1	0	12	0	0	0	0	0	0	0	0	2	0	0	2	0	3	0	0	2	0	1	0	0	2	0	2	3	0	1	1	0	0	0	0
B. animalis subsp. lactis	Chicken	ATCC 27536	GCA_001263975.1	1	0	0	0	0	0	0	0	0	0	0	1	0	12	0	0	0	0	0	0	0	0	2	0	0	2	0	3	0	0	2	0	1	0	0	2	0	2	3	0	1	1	0	0	0	0
B. animalis subsp. lactis	Sewage	ATCC 27673	GCA_001264015.1	1	1	0	0	0	0	0	0	0	0	0	1	0	12	0	0	0	0	0	0	0	0	3	0	0	1	0	2	0	0	1	0	1	0	0	2	0	1	3	0	2	1	0	0	0	0
B. animalis subsp. lactis		BM 25	GCA_002803775.1	2	0	0	0	0	0	0	0	0	0	0	1	0	12	0	0	0	0	0	0	0	0	2	0	0	2	0	3	0	0	2	0	1	0	0	3	0	2	3	0	1	1	0	0	0	0
B. animalis subsp. lactis		2010B	GCA_004154425.1	1	0	0	0	0	0	1	0	0	0	0	1	0	12	0	0	0	0	0	0	0	0	1	0	0	2	0	1	0	0	4	0	1	0	0	2	2	2	3	0	2	1	0	0	0	0
B. animalis subsp. lactis		BB-12	GCA_000025245.1	1	0	0	0	0	0	0	0	0	0	0	1	0	13	0	0	0	0	0	0	0	0	2	0	0	2	0	3	0	0	2	0	1	0	0	2	0	2	3	0	1	1	0	0	0	0
B. animalis subsp. lactis		ATCC 27673	GCA_000471945.1	1	1	0	0	0	0	0	0	0	0	0	1	0	12	0	0	0	0	0	0	0	0	3	0	0	1	0	2	0	0	1	0	1	0	0	2	0	1	3	0	2	1	0	0	0	0
B. animalis subsp. lactis		AD011	GCA_000021425.1	1	0	0	0	0	0	0	0	0	0	0	1	0	13	0	0	0	0	0	0	0	0	2	0	0	2	0	3	0	0	2	0	1	0	0	2	0	2	3	0	1	1	0	0	0	0
B. animalis subsp. lactis		Bl-04; ATCC SD5219	GCA_000022705.1	1	0	0	0	0	0	0	0	0	0	0	1	0	12	0	0	0	0	0	0	0	0	2	0	0	2	0	3	0	0	2	0	1	0	0	2	0	2	3	0	1	1	0	0	0	0
B. animalis subsp. lactis		DSM 10140	GCA_000022965.1	1	0	0	0	0	0	0	0	0	0	0	1	0	12	0	0	0	0	0	0	0	0	2	0	0	2	0	3	0	0	2	0	1	0	0	2	0	2	3	0	1	1	0	0	0	0
B. animalis subsp. lactis		V9	GCA_000092765.1	1	0	0	0	0	0	0	0	0	0	0	1	0	13	0	0	0	0	0	0	0	0	2	0	0	2	0	3	0	0	2	0	1	0	0	2	0	2	3	0	1	1	0	0	0	0
B. animalis subsp. lactis		HN019	GCA_000172535.1	1	0	0	0	0	0	0	0	0	0	0	1	0	12	0	0	0	0	0	0	0	0	2	0	0	2	0	3	0	0	2	0	1	0	0	2	0	2	3	0	1	1	0	0	0	0
B. animalis subsp. lactis		CNCM I-2494	GCA_000220885.1	1	0	0	0	0	0	0	0	0	0	0	1	0	13	0	0	0	0	0	0	0	0	2	0	0	2	0	3	0	0	2	0	1	0	0	2	0	2	3	0	1	1	0	0	0	0
B. animalis subsp. lactis		BLC1	GCA_000224965.2	1	0	0	0	0	0	0	0	0	0	0	1	0	12	0	0	0	0	0	0	0	0	2	0	0	2	0	3	0	0	2	0	1	0	0	2	0	2	3	0	1	1	0	0	0	0
B. animalis subsp. lactis		BS 01	GCA_000240765.1	1	0	0	0	0	0	0	0	0	0	0	1	0	13	0	0	0	0	0	0	0	0	2	0	0	2	0	3	0	0	2	0	1	0	0	2	0	2	3	0	1	1	0	0	0	0
B. animalis subsp. lactis		B420	GCA_000277325.1	1	0	0	0	0	0	0	0	0	0	0	1	0	12	0	0	0	0	0	0	0	0	2	0	0	2	0	3	0	0	2	0	1	0	0	2	0	2	3	0	1	1	0	0	0	0
B. animalis subsp. lactis		Bi-07	GCA_000277345.1	1	0	0	0	0	0	0	0	0	0	0	1	0	12	0	0	0	0	0	0	0	0	2	0	0	2	0	3	0	0	2	0	1	0	0	2	0	2	3	0	1	1	0	0	0	0
B. animalis subsp. lactis		Bl12	GCA_000414215.1	1	0	0	0	0	0	0	0	0	0	0	1	0	12	0	0	0	0	0	0	0	0	2	0	0	2	0	3	0	0	2	0	1	0	0	2	0	2	3	0	1	1	0	0	0	0
B. animalis subsp. lactis		CECT 8145	GCA_000612705.1	1	0	0	0	0	0	0	0	0	0	0	1	0	12	0	0	0	0	0	0	0	0	2	0	0	2	0	3	0	0	2	0	1	0	0	2	0	2	3	0	1	1	0	0	0	0
B. pseudolongum subsp. globosum	Alpaca	1655B	GCA_004156195.1	0	0	0	0	1	0	0	0	0	0	0	0	0	17	0	0	0	0	0	0	0	0	2	0	0	1	0	0	0	1	1	0	1	0	0	2	0	0	3	0	0	1	0	0	0	0
B. pseudolongum subsp. globosum	Bear	1744B	GCA_002846675.1	0	0	0	0	1	0	0	0	0	0	0	0	0	17	0	0	0	0	0	0	0	0	2	0	1	1	0	0	0	1	1	0	1	0	0	2	0	0	3	0	0	1	0	0	0	0
B. pseudolongum subsp. globosum	Bear	2023B	GCA_004155635.1	2	0	0	0	1	0	1	0	0	0	0	0	0	17	1	0	0	0	0	0	0	0	3	0	0	1	0	0	1	3	1	2	1	0	0	3	0	1	3	0	0	1	0	0	0	0
B. pseudolongum subsp. globosum	Bovine	LMG 11569	GCA_000741295.1	0	0	0	0	1	0	0	0	0	0	0	0	0	17	0	0	0	0	0	0	0	0	2	0	0	1	0	0	0	2	1	0	1	0	0	1	0	0	3	0	0	0	0	0	0	0
B. pseudolongum subsp. globosum	Calf	2004B	GCA_004155115.1	0	0	0	0	1	0	0	0	0	0	0	0	0	16	0	0	0	0	0	0	0	0	2	0	0	1	0	0	0	2	1	0	1	0	0	2	0	0	3	0	0	0	0	0	0	0
B. pseudolongum subsp. globosum	Calf	S102017	GCA_004155405.1	0	0	0	0	1	0	0	0	0	0	0	0	0	15	0	0	0	0	0	0	0	0	2	0	0	1	0	0	0	2	1	0	1	0	0	1	0	0	3	0	0	0	0	0	0	0
B. pseudolongum subsp. globosum	Calf	S102015	GCA_004155425.1	0	0	0	0	1	0	0	0	0	0	0	0	0	15	0	0	0	0	0	0	0	0	2	0	0	1	0	0	0	2	1	0	1	0	0	2	0	0	3	0	0	0	0	0	0	0
B. pseudolongum subsp. globosum	Goat	S22511	GCA_004155435.1	0	0	0	0	1	0	0	0	0	0	0	0	0	17	0	1	0	0	0	0	0	0	2	0	0	1	0	0	0	1	1	0	1	0	0	2	0	0	7	0	0	1	0	0	0	0
B. pseudolongum subsp. globosum	Goat	S22506	GCA_004155325.1	0	0	0	0	1	0	0	0	0	0	0	0	0	16	0	0	0	0	0	0	0	0	2	0	0	0	0	0	0	2	1	0	1	0	0	1	0	0	3	0	0	0	0	0	0	0
B. pseudolongum subsp. globosum	Goat	S112206	GCA_004155855.1	0	0	0	0	1	0	0	0	0	0	0	0	0	17	0	0	0	0	0	0	0	0	2	0	0	1	0	0	0	2	1	0	1	0	0	2	0	0	3	0	0	0	0	0	0	0
B. pseudolongum subsp. globosum	Goat	1780B	GCA_004168525.1	0	0	0	0	1	0	0	0	0	0	0	0	0	16	0	0	0	0	0	0	0	0	2	0	0	1	0	0	0	1	1	0	1	0	0	2	0	0	3	0	0	1	0	0	0	0
B. pseudolongum subsp. globosum	Sheep	DSM 20092	GCA_002706665.1	0	0	0	0	0	0	0	0	0	0	0	0	0	17	0	0	0	0	0	0	0	0	2	0	0	1	0	0	0	2	1	0	1	0	0	1	0	0	3	0	0	0	0	0	0	0
B. pseudolongum subsp. globosum	Sheep	2083B	GCA_004155045.1	0	0	0	0	1	0	0	0	0	0	0	0	0	17	0	1	0	0	0	0	0	0	2	0	0	2	0	0	0	2	1	0	1	0	0	2	0	0	7	0	0	1	0	0	0	0
B. pseudolongum subsp. globosum	Sheep	2019B	GCA_004155095.1	1	0	0	0	1	0	0	0	0	0	0	0	0	15	0	0	0	0	0	0	0	0	3	0	0	2	0	0	0	2	1	0	1	0	0	2	0	0	3	0	0	1	0	0	0	0
B. pseudolongum subsp. globosum	Camel	1616B	GCA_004156145.1	1	0	0	0	1	0	0	0	0	0	0	1	0	16	0	0	0	0	0	0	0	0	3	0	0	2	0	0	1	2	1	2	1	0	0	2	0	1	3	0	0	1	0	0	0	0
B. pseudolongum subsp. globosum	llama	1619B	GCA_002846685.1	0	0	0	0	1	0	0	0	0	0	0	0	0	17	0	0	0	0	0	0	0	0	2	0	1	1	0	0	0	1	1	0	1	0	0	1	0	0	3	0	0	1	0	0	0	0
B. pseudolongum subsp. globosum	Capybara	2032B	GCA_004155615.1	1	0	0	0	1	0	0	0	0	0	0	0	0	17	0	1	0	0	0	0	0	0	3	0	0	1	0	0	1	3	1	3	1	0	0	3	0	2	7	1	0	1	0	0	0	0
B. pseudolongum subsp. globosum	Giraffe	1747B	GCA_002846835.1	1	0	0	0	1	0	0	0	0	0	0	1	0	17	0	1	0	0	0	0	0	0	3	0	0	3	0	0	1	3	1	2	1	0	0	3	0	2	7	0	0	1	0	0	0	0
B. pseudolongum subsp. globosum	Wallaby	1734B	GCA_002846845.1	2	0	0	0	1	0	1	0	0	0	0	0	0	17	1	1	0	0	0	0	0	0	3	0	0	2	0	0	0	2	1	0	1	0	0	3	0	0	7	0	0	1	0	0	0	0
B. pseudolongum subsp. globosum	Hippopotamus	1691B	GCA_002846875.1	0	0	0	0	1	0	0	0	0	0	0	0	0	18	0	0	0	0	0	0	0	0	2	0	1	1	0	0	0	1	1	0	1	0	0	2	0	0	3	0	0	1	0	0	0	0
B. pseudolongum subsp. globosum	Hippopotamus	1678B	GCA_004155155.1	0	0	0	0	1	0	0	0	0	0	0	0	0	17	0	0	0	0	0	0	0	0	2	0	0	1	0	0	0	1	1	0	1	0	0	2	0	0	3	0	0	1	0	0	0	0
B. pseudolongum subsp. globosum	Hippopotamus	2029B	GCA_004155165.1	1	0	0	0	1	0	0	0	0	0	0	0	0	17	0	1	0	0	0	0	0	0	3	0	0	1	0	0	1	3	1	3	1	0	0	3	0	2	7	1	0	1	0	0	0	0
B. pseudolongum subsp. globosum	Hippopotamus	2088B	GCA_004156075.1	1	0	0	0	1	0	0	0	0	0	0	0	0	16	0	0	0	0	0	0	0	0	3	0	0	2	0	0	0	2	1	1	1	0	0	3	0	1	4	0	0	1	0	0	0	0
B. pseudolongum subsp. globosum	Hippopotamus	2086B	GCA_004156135.1	1	0	0	0	1	0	0	0	0	0	0	0	0	16	0	0	0	0	0	0	0	0	3	0	0	2	0	0	0	2	1	1	1	0	0	3	0	1	4	0	0	1	0	0	0	0
B. pseudolongum subsp. globosum	Hippopotamus	2072B	GCA_004155565.1	2	0	0	0	1	0	1	0	0	0	0	0	0	17	1	1	0	0	0	0	0	0	3	0	0	3	0	0	1	3	1	2	1	0	0	3	0	2	7	0	0	1	0	0	0	0
B. pseudolongum subsp. globosum	Kangaroo	2009B	GCA_004155625.1	1	0	0	0	1	0	0	0	0	0	0	2	0	14	0	1	0	0	0	1	0	0	3	0	0	1	0	1	0	2	3	1	1	0	0	3	0	1	13	0	0	2	0	0	0	0
B. pseudolongum subsp. globosum	Kangaroo	2109B	GCA_004155475.1	1	0	0	0	1	0	0	0	0	0	0	0	0	15	0	0	0	0	0	0	0	0	3	0	0	0	0	0	1	3	1	3	1	0	0	3	0	1	3	1	0	1	0	0	0	0
B. pseudolongum subsp. globosum	Dolichotis	2089B	GCA_004155525.1	1	0	0	0	1	0	0	0	0	0	0	0	0	17	0	0	0	0	0	0	0	0	3	0	0	1	0	0	1	3	1	1	1	0	0	3	0	1	3	0	0	1	0	0	0	0
B. pseudolongum subsp. globosum	Horse	1577B	GCA_004156215.1	2	0	0	0	1	0	0	0	0	0	0	0	0	15	0	0	0	0	0	0	0	0	3	0	0	1	0	0	0	2	1	1	1	0	0	3	0	1	3	0	0	1	0	0	0	0
B. pseudolongum subsp. globosum	Hare	1805B	GCA_004155375.1	1	0	0	0	1	0	0	0	0	0	0	0	0	17	0	1	0	0	0	0	0	0	3	0	0	2	0	0	1	3	1	2	1	0	0	3	0	2	7	0	0	1	0	0	0	0
B. pseudolongum subsp. globosum	Chicken	1549B	GCA_002846715.1	1	0	0	0	1	0	0	0	0	0	0	0	0	17	0	0	0	0	0	0	0	0	3	0	0	0	0	0	0	2	1	1	1	0	0	3	0	0	3	0	0	1	0	0	0	0
B. pseudolongum subsp. globosum	Chicken	1511B	GCA_004155235.1	1	0	0	0	1	0	0	0	0	0	0	0	0	17	0	0	0	0	0	0	0	0	3	0	0	1	0	0	0	2	1	1	1	0	0	3	0	0	3	0	0	1	0	0	0	0
B. pseudolongum subsp. globosum	Chicken	1546B	GCA_004155845.1	1	0	0	0	1	0	0	0	0	0	0	0	0	17	0	0	0	0	0	0	0	0	3	0	0	0	0	0	0	2	1	1	1	0	0	3	0	0	3	0	0	1	0	0	0	0
B. pseudolongum subsp. globosum	Quail	2017B	GCA_004155275.1	1	0	0	0	1	0	0	0	0	0	0	0	0	16	0	0	0	0	0	0	0	0	3	0	0	2	0	0	1	3	1	1	1	0	0	3	0	2	3	0	0	1	0	0	0	0
B. pseudolongum subsp. globosum	Pigeon	1550B	GCA_004155805.1	1	0	0	0	1	0	0	0	0	0	0	0	0	16	0	1	0	0	0	0	0	0	3	0	0	1	0	0	0	2	1	1	1	0	0	3	0	1	7	0	0	1	0	0	0	0
B. pseudolongum subsp. globosum	Pigeon	2048B	GCA_004155595.1	2	0	0	0	1	0	0	0	0	0	0	0	0	17	0	0	0	0	0	0	0	0	3	0	0	3	0	0	0	2	1	1	1	0	0	3	0	0	3	0	0	1	0	0	0	0
B. pseudolongum subsp. globosum	Porcupine	2115B	GCA_004156085.1	1	0	0	0	1	0	0	0	0	0	0	0	0	17	0	0	0	0	0	0	0	0	3	0	0	1	0	0	1	3	1	1	1	0	0	3	0	1	3	0	0	1	0	0	0	0
B. pseudolongum subsp. globosum	Porcupine	2114B	GCA_004154995.1	1	0	0	0	1	0	0	0	0	0	0	0	0	17	0	0	0	0	0	0	0	0	3	0	0	1	0	0	1	3	1	1	1	0	0	3	0	2	3	0	0	1	0	0	0	0
B. pseudolongum subsp. globosum	Quail	2049B	GCA_004156115.1	1	0	0	0	1	0	0	0	0	0	0	0	0	16	0	0	0	0	0	0	0	0	3	0	0	2	0	0	1	3	1	1	1	0	0	3	0	2	3	0	0	1	0	0	0	0
B. pseudolongum subsp. globosum	Duck	1578B	GCA_004155745.1	2	0	0	0	1	0	0	0	0	0	0	0	0	15	0	0	0	0	0	0	0	0	3	0	0	1	0	0	0	2	1	1	1	0	0	3	0	1	3	0	0	1	0	0	0	0
B. pseudolongum subsp. globosum	Rodent	1520B	GCA_002846775.1	1	0	0	0	1	0	0	0	0	0	0	1	0	16	0	0	0	0	0	0	0	0	2	0	0	0	0	0	1	3	1	1	1	0	0	3	0	3	3	0	0	1	0	0	0	0
B. pseudolongum subsp. globosum	Rodent	1524B	GCA_002846815.1	1	0	0	0	1	0	1	0	0	0	0	0	0	16	1	0	0	0	0	0	0	0	2	0	0	3	0	0	0	2	1	1	1	0	0	3	0	1	3	0	0	1	0	0	0	0
B. pseudolongum subsp. globosum	Rodent	2105B	GCA_004155505.1	1	0	0	0	1	0	0	0	0	0	0	0	0	16	0	0	0	0	0	0	0	0	3	0	0	1	0	0	1	3	1	1	1	0	0	3	0	4	3	0	0	1	0	0	0	0
B. pseudolongum subsp. globosum	Mouflon	2098B	GCA_004155495.1	1	0	0	0	1	0	0	0	0	0	0	0	0	16	0	0	0	0	0	0	0	0	3	0	0	2	0	0	0	2	1	1	1	0	0	3	0	1	4	0	0	1	0	0	0	0
B. pseudolongum subsp. globosum	Snake	2093B	GCA_004155535.1	1	0	0	0	1	0	0	0	0	0	0	1	0	15	0	0	0	0	0	0	0	0	3	0	0	1	0	0	1	2	1	2	1	0	0	3	0	1	3	0	0	1	0	0	0	0
B. pseudolongum subsp. globosum	Roe Deer	1791B	GCA_004155695.1	0	0	0	0	1	0	0	0	0	0	0	0	0	17	0	2	0	0	0	0	0	0	2	0	0	1	0	0	0	1	1	0	1	0	0	1	0	0	7	0	0	1	0	0	0	0
B. pseudolongum subsp. globosum	Fox	1770B	GCA_004155705.1	1	0	0	0	1	0	0	0	0	0	0	0	0	15	0	0	0	0	0	0	0	0	3	0	0	1	2	0	0	1	1	0	1	1	0	3	0	3	4	0	0	0	0	0	0	0
B. pseudolongum subsp. globosum	Dog	2054B	GCA_004155015.1	1	0	0	0	1	0	1	0	0	0	0	1	0	12	1	1	0	0	0	0	0	0	3	0	0	0	0	1	0	2	1	0	1	0	0	1	0	0	10	0	0	2	0	0	0	0
B. pseudolongum subsp. globosum	Dog	2071B	GCA_004155135.1	1	0	0	0	1	0	1	0	0	0	0	1	0	16	1	0	0	0	0	0	0	0	3	0	0	3	0	0	0	2	1	0	1	0	0	3	0	0	3	0	0	1	0	0	0	0
B. pseudolongum subsp. globosum	Dog	2012B	GCA_004155145.1	2	0	0	0	1	0	0	0	0	0	0	1	0	18	0	0	0	0	0	0	0	0	3	0	0	1	0	0	0	2	1	1	1	0	0	4	0	1	3	0	0	1	0	0	0	0
B. pseudolongum subsp. globosum	Dog	2000B	GCA_004155285.1	1	0	0	0	1	0	1	0	0	0	0	1	0	15	1	1	0	0	0	0	0	0	3	0	0	1	1	1	0	2	1	0	1	1	0	2	0	1	11	0	0	2	0	0	0	0
B. pseudolongum subsp. globosum	Dog	2003B	GCA_004155305.1	1	0	0	0	1	0	0	0	0	0	0	2	0	13	0	1	0	0	0	1	0	0	3	0	0	2	1	1	0	2	3	1	1	1	0	3	0	1	12	0	0	2	0	0	0	0
B. pseudolongum subsp. globosum	Dog	2001B	GCA_004155645.1	1	0	0	0	1	0	1	0	0	0	0	0	0	16	1	0	0	0	0	1	0	0	3	1	0	1	0	0	0	2	1	0	1	0	0	3	2	1	4	0	1	1	0	0	0	0
B. pseudolongum subsp. globosum	Pig	LMG 11571	GCA_000741325.1	1	0	0	0	1	0	1	0	0	0	0	0	0	13	1	1	0	0	0	0	0	0	3	0	0	1	0	0	0	2	1	0	1	0	0	1	0	0	7	0	0	1	0	0	0	0
B. pseudolongum subsp. globosum	Pig	1595B	GCA_002846725.1	1	0	0	0	1	0	0	0	0	0	0	0	0	14	0	0	0	0	0	0	0	0	3	0	0	1	0	0	1	3	1	2	1	0	0	2	0	1	4	0	0	1	0	0	0	0
B. pseudolongum subsp. globosum	Pig	1370B	GCA_002846755.1	1	0	0	0	1	0	1	0	0	0	0	0	0	14	1	0	0	0	0	0	0	0	3	0	0	1	0	0	0	2	1	1	1	0	0	2	0	0	3	0	0	1	0	0	0	0
B. pseudolongum subsp. globosum	Pig	1604B	GCA_004155395.1	1	0	0	0	1	0	1	0	0	0	0	0	0	15	1	0	0	0	0	0	0	0	3	0	0	0	0	0	0	2	1	0	1	0	0	2	0	1	4	0	0	1	0	0	0	0
B. pseudolongum subsp. globosum		2113B	GCA_004155295.1	1	0	0	0	1	0	0	0	0	0	0	0	0	16	0	0	0	0	0	0	0	0	3	0	0	2	0	0	0	2	1	1	1	0	0	3	0	1	4	0	0	1	0	0	0	0
B. pseudolongum subsp. globosum	Donkey	1565B	GCA_004155795.1	1	0	0	0	1	0	0	0	0	0	0	0	0	17	0	0	0	0	0	0	0	0	3	0	0	0	0	0	0	2	1	1	1	0	0	3	0	0	3	0	0	1	0	0	0	0
B. pseudolongum subsp. globosum	Rodent	2103B	GCA_004156175.1	2	0	0	0	1	0	1	0	0	0	0	0	0	15	1	0	0	0	0	0	0	0	3	0	1	1	0	0	1	3	1	2	1	0	0	2	0	1	3	0	0	1	0	0	0	0
B. pseudolongum subsp. globosum	Dog	2002B	GCA_004156235.1	1	0	0	0	1	0	1	0	0	0	0	1	0	14	1	1	0	0	0	1	0	0	3	0	0	2	1	0	0	2	1	0	1	1	0	3	0	1	7	0	0	1	0	0	0	0
B. pseudolongum subsp. globosum	Sewage	AS09scLD_379	GCA_012727475.1	0	0	0	0	1	0	0	0	0	0	0	0	0	16	0	0	0	0	0	0	0	0	2	0	0	2	0	0	0	2	1	0	1	0	0	1	0	0	3	0	0	0	0	0	0	0
B. pseudolongum subsp. pseudolongum	Human	PV8-2	GCA_000800475.2	1	0	0	0	1	0	0	0	0	0	0	0	0	13	0	1	0	0	0	0	0	0	3	0	0	1	0	0	0	2	1	1	1	0	0	3	0	1	7	0	0	1	0	0	0	0
B. pseudolongum subsp. pseudolongum	Human	AF13-3LB	GCA_003464845.1	1	0	0	0	1	0	0	0	0	0	0	0	0	17	0	1	0	0	0	0	0	0	3	0	0	0	0	0	1	3	1	2	1	0	0	3	0	2	7	1	0	1	0	0	0	0
B. pseudolongum subsp. pseudolongum	Tapir	1629B	GCA_004155725.1	0	0	0	0	1	0	1	0	0	0	0	0	0	13	1	0	0	0	0	0	0	0	2	0	0	0	0	0	0	2	1	0	1	0	0	1	0	0	4	0	0	1	0	0	0	0
B. pseudolongum subsp. pseudolongum	Rodent	UMB-MBP-01	GCA_002282915.1	1	0	0	0	1	0	0	0	0	0	0	0	0	17	0	0	0	0	0	0	0	0	3	0	1	0	0	0	1	3	1	2	1	0	0	3	0	1	3	0	0	1	0	0	0	0
B. pseudolongum subsp. pseudolongum	Rodent	WYJ21-P61	GCA_003612445.1	1	0	0	0	1	0	0	0	0	0	0	0	0	15	0	1	0	0	0	0	0	0	3	0	0	1	0	0	1	3	1	1	1	0	0	3	0	2	7	0	0	1	0	0	0	0
B. pseudolongum subsp. pseudolongum	Rodent	NM87_A27A	GCA_004801625.1	1	0	0	0	1	0	1	0	0	0	0	0	0	14	1	0	0	0	0	0	0	0	3	0	2	2	0	0	1	3	1	2	1	0	0	3	0	2	2	0	0	1	0	0	0	0
B. pseudolongum subsp. pseudolongum	Rodent	22-20	GCA_009911435.1	1	0	0	0	1	0	0	0	0	0	0	0	0	15	0	1	0	0	0	0	0	0	3	0	0	1	0	0	1	3	1	1	1	0	0	3	0	2	7	0	0	1	0	0	0	0
B. pseudolongum subsp. pseudolongum	Pig	1612B	GCA_004155715.1	1	0	0	0	1	0	1	0	0	0	0	0	0	14	1	0	0	0	0	0	0	0	3	0	0	2	0	0	0	2	1	0	1	0	0	2	0	0	3	0	0	1	0	0	0	0
B. pseudolongum subsp. pseudolongum	Pig	1513B	GCA_004155835.1	1	0	0	0	1	0	1	0	0	0	0	0	0	14	1	0	0	0	0	0	0	0	3	0	0	0	0	0	0	2	1	0	1	0	0	2	0	0	3	0	0	1	0	0	0	0
B. thermophilum	Infant	RBL67	GCF_000347695.1	0	0	0	0	1	0	0	0	0	0	0	0	0	14	0	0	0	0	0	0	0	1	0	0	0	1	0	0	0	1	0	1	2	0	0	1	0	1	0	0	3	1	0	0	0	0
B. thermophilum	Bovine	DSM 20212	GCF_000687575.1	0	0	0	0	1	0	0	0	0	0	0	0	0	16	0	0	0	0	0	0	0	0	0	0	0	1	0	0	0	1	0	1	1	0	0	1	0	1	0	0	1	1	0	0	0	0
B. thermophilum	Pig	DSM 20210	GCF_000771265.1	0	0	0	0	1	0	0	0	0	0	0	0	0	15	0	0	0	0	0	0	0	1	0	0	0	1	0	0	0	1	0	1	2	0	0	1	0	1	0	0	3	1	0	0	0	0
B. thermophilum	Pig	1543B	GCF_002846655.1	0	0	0	0	0	0	0	0	0	0	0	0	0	17	0	0	0	0	0	0	0	1	0	0	0	1	0	0	0	3	0	1	3	0	0	1	0	1	0	0	3	1	0	0	0	0
B. thermophilum	Pig	1542B	GCF_002846785.1	0	0	0	0	0	0	0	0	0	0	0	0	0	16	0	0	0	0	0	0	0	1	0	0	0	1	0	0	0	1	0	1	1	0	0	1	0	1	0	0	3	1	0	0	0	0
B. bifidum	Human	S6	GCA_003390735.1	1	0	1	0	0	1	2	0	0	1	0	0	1	6	1	0	0	0	0	0	0	0	3	4	1	2	0	0	1	1	0	0	0	2	0	1	0	1	2	0	0	0	0	0	0	0
B. bifidum	Human	LMG 11582	GCA_001020275.1	1	0	1	0	0	1	2	0	0	1	0	0	1	6	1	0	0	0	0	0	0	0	3	4	1	2	0	0	1	1	0	0	0	2	0	1	0	2	2	0	1	0	0	0	0	0
B. bifidum	Human	LMG 11583	GCA_001020335.1	1	0	1	0	0	1	2	0	0	0	0	0	1	6	1	0	0	0	0	0	0	0	3	4	1	1	0	0	1	1	0	0	0	1	0	1	0	1	2	0	0	0	0	0	0	0
B. bifidum	Human	ICIS-310	GCA_002114145.1	1	0	1	0	0	1	0	0	0	1	0	0	1	6	1	0	0	0	0	0	0	0	2	4	0	2	0	0	1	1	0	0	0	2	0	1	0	2	2	0	0	0	0	0	0	0
B. bifidum	Human	TM07-4AC	GCA_003436135.1	1	0	1	0	0	1	3	0	0	1	0	0	1	6	1	0	0	0	0	0	0	0	3	4	1	1	0	0	1	1	0	0	0	2	0	1	0	2	3	0	1	0	0	0	0	0
B. bifidum	Human	TF07-22	GCA_003437175.1	1	0	1	0	0	1	2	0	0	0	0	0	1	6	1	0	0	0	0	0	0	0	3	4	0	1	0	0	1	1	0	0	0	2	0	1	0	2	2	0	1	0	0	0	0	0
B. bifidum	Human	TF06-14AC	GCA_003437325.1	1	0	1	0	0	1	2	0	0	1	0	0	1	6	0	0	0	0	0	0	0	0	3	4	0	2	0	0	1	1	0	0	0	2	0	1	0	1	2	0	0	0	0	0	0	0
B. bifidum	Human	AF11-25B	GCA_003465425.1	2	0	1	0	0	1	2	0	0	1	0	0	1	6	1	0	0	0	0	0	0	0	3	4	1	1	0	0	1	1	0	0	0	2	0	1	0	2	3	0	0	0	0	0	0	0
B. bifidum	Human	TM06-5	GCA_003466365.1	2	0	1	0	0	1	3	0	0	1	0	0	1	6	1	0	0	0	0	0	0	0	3	4	1	1	0	0	1	1	0	0	0	2	0	1	0	2	2	0	0	0	0	0	0	0
B. bifidum	Human	AM42-15AC	GCA_003467985.1	2	0	1	0	0	1	2	0	0	1	0	0	1	6	1	0	0	0	0	0	0	0	3	4	1	1	0	0	1	1	0	0	0	2	0	1	0	1	3	0	0	0	0	0	0	0
B. bifidum	Human	AM36-1AC	GCA_003468415.1	1	0	1	0	0	1	2	0	0	1	0	0	1	6	1	0	0	0	0	0	0	0	3	4	0	2	0	0	1	1	0	0	0	2	0	1	0	2	3	0	0	0	0	0	0	0
B. bifidum	Human	AM18-29	GCA_003470585.1	1	0	1	0	0	1	2	0	0	1	0	0	1	6	0	0	0	0	0	0	0	0	3	4	1	2	0	0	1	1	0	0	0	2	0	1	0	1	2	0	0	0	0	0	0	0
B. bifidum	Human	AM18-12AC	GCA_003470615.1	1	0	1	0	0	1	2	0	0	1	0	0	1	6	0	0	0	0	0	0	0	0	3	4	1	2	0	0	1	1	0	0	0	2	0	1	0	1	2	0	0	0	0	0	0	0
B. bifidum	Human	AF45-10	GCA_003474045.1	1	0	1	0	0	1	0	0	0	1	0	0	1	6	1	0	0	0	0	0	0	0	3	4	0	1	0	0	1	1	0	0	0	2	0	1	0	2	3	0	1	0	0	0	0	0
B. bifidum	Human	S791	GCA_001595435.1	1	0	1	0	0	1	2	0	0	1	0	0	1	6	1	0	0	0	0	0	0	0	2	4	0	2	0	0	1	1	0	0	0	2	0	1	0	2	2	0	0	0	0	0	0	0
B. bifidum	Human	LMAG:79	GCA_008679685.1	1	0	1	0	0	1	2	0	0	1	0	0	1	6	1	0	0	0	0	0	0	0	3	4	0	1	0	0	1	1	0	0	0	2	0	1	0	1	3	0	1	0	0	0	0	0
B. bifidum	Human	LMAG:66	GCA_008679935.1	1	0	1	0	0	1	2	0	0	2	0	0	1	4	1	0	0	0	0	0	0	0	3	4	0	1	0	0	1	1	0	0	0	2	0	1	0	1	2	0	0	0	0	0	0	0
B. bifidum	Human	LMAG:12	GCA_008681015.1	1	0	1	0	0	1	2	0	0	1	0	0	1	6	1	0	0	0	0	0	0	0	3	4	0	1	0	0	1	1	0	0	0	2	0	1	0	1	2	0	0	0	0	0	0	0
B. bifidum	Human	BIO5480	GCA_008868415.1	1	0	1	0	0	1	0	0	0	0	0	0	1	6	0	0	0	0	0	0	0	0	3	4	1	1	0	0	1	1	0	0	0	1	0	1	0	1	2	0	0	0	0	0	0	0
B. bifidum	Human	ca_0067	GCA_004167365.1	1	0	1	0	0	1	2	0	0	1	0	0	1	6	1	0	0	0	0	0	0	0	3	4	0	1	0	0	1	1	0	0	0	2	0	1	0	1	3	0	0	0	0	0	0	0
B. bifidum	Human	BSD2780061688st1_G1	GCA_005844205.1	1	0	1	0	0	1	2	0	0	1	0	0	1	6	1	0	0	0	0	0	0	0	3	4	0	2	0	0	1	1	0	0	0	2	0	1	0	2	2	0	0	0	0	0	0	0
B. bifidum	Human	1001271st1_H11	GCA_005844365.1	0	0	1	0	0	1	1	0	0	0	0	0	1	6	1	0	0	0	0	0	0	0	3	4	1	1	0	0	1	1	0	0	0	2	0	1	0	2	2	0	0	0	0	0	0	0
B. bifidum	Infant	BF3	GCA_001281345.1	2	0	1	0	0	1	2	0	0	1	0	0	1	6	1	0	0	0	0	0	0	0	3	4	1	2	0	0	1	1	0	0	0	2	0	1	0	2	2	0	0	0	0	0	0	0
B. bifidum	Infant	IPLA 20017	GCA_001020265.1	1	0	1	0	0	1	2	0	0	0	0	0	1	5	0	0	0	0	0	0	0	0	3	4	0	1	0	0	1	1	0	0	0	2	0	1	0	1	2	0	1	0	0	0	0	0
B. bifidum	Infant	A8	GCA_001020245.1	1	0	1	0	0	1	2	0	0	1	0	0	1	6	1	0	0	0	0	0	0	0	3	4	1	2	0	0	1	1	0	0	0	2	0	1	0	2	2	0	1	0	0	0	0	0
B. bifidum	Infant	156B	GCA_001020255.1	1	0	1	0	0	1	2	0	0	0	0	0	1	6	1	0	0	0	0	0	0	0	3	4	0	1	0	0	1	1	0	0	0	2	0	1	0	1	3	0	0	0	0	0	0	0
B. bifidum	Infant	LMG 13200	GCA_001020325.1	1	0	1	0	0	1	2	0	0	0	0	0	1	6	1	0	0	0	0	0	0	0	3	4	1	1	0	0	1	1	0	0	0	2	0	1	0	1	3	0	0	0	0	0	0	0
B. bifidum	Infant	85B	GCA_001020355.1	1	0	1	0	0	1	2	0	0	1	0	0	1	6	1	0	0	0	0	0	0	0	3	4	1	1	0	0	1	1	0	0	0	2	0	1	0	2	3	0	0	0	0	0	0	0
B. bifidum	Infant	324B	GCA_001020375.1	1	0	1	0	0	1	2	0	0	1	0	0	1	6	1	0	0	0	0	0	0	0	3	4	0	2	0	0	1	1	0	0	0	2	0	1	0	2	3	0	0	0	0	0	0	0
B. bifidum	Infant	IPLA 20015	GCA_001020405.1	1	0	1	0	0	1	2	0	0	1	0	0	1	6	1	0	0	0	0	0	0	0	3	4	0	1	0	0	1	1	0	0	0	2	0	1	0	1	2	0	0	0	0	0	0	0
B. bifidum	Infant	LMG 11041	GCA_000741085.1	2	0	1	0	0	1	2	0	0	1	0	0	1	6	1	0	0	0	0	0	0	0	3	4	0	2	0	0	1	1	0	0	0	3	0	1	0	2	3	0	0	0	0	0	0	0
B. bifidum	Human Milk	1887B	GCA_002076105.1	1	0	1	0	0	1	2	0	0	1	0	0	1	6	0	0	0	0	0	0	0	0	3	4	0	2	0	0	1	1	0	0	0	2	0	1	0	2	3	0	0	0	0	0	0	0
B. bifidum	Commercial dietary supplements	DS33_23	GCA_003094645.1	1	0	1	0	0	1	1	0	0	1	0	0	1	6	0	0	0	0	0	0	0	0	3	4	1	2	0	0	1	1	0	0	0	2	0	1	0	2	2	0	1	0	0	0	0	0
B. bifidum	Commercial dietary supplements	DS30_23	GCA_003094755.1	1	0	1	0	0	1	2	0	0	1	0	0	1	6	1	0	0	0	0	0	0	0	2	4	1	2	0	0	1	1	0	0	0	2	0	1	0	2	2	0	1	0	0	0	0	0
B. bifidum	Commercial dietary supplements	DS26_23	GCA_003095035.1	1	0	1	0	0	1	0	0	0	1	0	0	1	6	0	0	0	0	0	0	0	0	3	4	1	2	0	0	1	1	0	0	0	2	0	1	0	2	2	0	1	0	0	0	0	0
B. bifidum	Vagina	VA07-1AN	GCA_011029205.1	1	0	1	0	0	1	0	0	0	1	0	0	1	6	0	0	0	0	0	0	0	0	3	4	0	1	0	0	1	1	0	0	0	2	0	1	0	2	2	0	0	0	0	0	0	0
B. breve	Human	DSM 20213	GCA_000158015.1	2	0	0	0	0	0	1	0	0	0	1	2	1	14	0	0	0	0	0	0	0	0	5	1	0	1	0	0	0	6	1	2	2	1	1	1	3	2	0	0	2	0	1	0	0	1
B. breve	Human	DPC 6330	GCA_000226175.2	2	0	0	0	0	0	1	0	0	0	1	0	1	13	0	0	0	0	0	0	0	0	2	1	0	2	0	0	0	5	0	1	2	1	0	1	2	3	1	0	2	0	1	0	0	0
B. breve	Human	MCC 0476	GCA_001263845.1	1	0	0	0	0	0	1	0	0	0	1	1	1	13	0	0	0	0	0	0	0	0	3	1	0	1	0	0	0	5	0	2	2	1	0	1	3	2	0	0	2	0	1	0	0	1
B. breve	Human	MCC 0121	GCA_001264045.1	0	0	0	0	0	0	0	0	0	0	1	1	0	9	0	1	0	0	0	0	0	0	1	0	0	0	0	0	0	3	0	1	1	1	0	0	3	0	0	0	2	0	0	0	0	1
B. breve	Human	MCC 1604	GCA_001264155.1	1	0	0	0	0	0	1	0	0	0	1	1	1	12	0	0	0	0	1	0	0	0	2	1	0	1	0	0	0	4	1	0	2	1	0	1	2	2	0	0	2	0	1	1	0	0
B. breve	Human	BR-06	GCA_001685705.1	1	0	0	0	0	0	1	0	0	0	1	1	1	12	0	0	0	0	0	0	0	0	3	1	0	1	0	0	0	3	0	1	2	1	0	1	2	2	0	0	2	0	1	0	0	0
B. breve	Human	BR-19	GCA_001685805.1	2	0	0	0	0	0	1	0	0	0	1	1	1	14	0	0	0	0	0	0	0	0	3	1	1	1	0	0	0	4	0	1	3	1	1	1	2	2	0	0	2	0	1	0	0	1
B. breve	Human	BR-L29	GCA_001685945.1	2	0	0	0	0	0	1	0	0	0	1	1	1	13	0	0	0	0	0	0	0	0	3	1	0	1	0	0	0	4	0	2	2	1	0	1	3	2	0	0	2	0	1	0	0	1
B. breve	Human	UMB0915	GCA_002861455.1	2	0	0	0	0	0	1	0	0	0	1	0	1	14	0	1	0	0	0	0	0	0	5	1	0	3	0	0	0	7	0	0	1	1	0	2	2	2	0	0	2	0	1	0	0	1
B. breve	Human	UMB0089	GCA_002871815.1	1	0	0	0	0	0	1	0	0	0	1	0	1	13	0	1	0	0	0	0	0	0	2	1	0	1	0	0	0	4	0	1	2	1	0	1	2	2	0	0	2	0	1	0	0	0
B. breve	Human	Bifido_10	GCA_900157105.1	1	0	0	0	0	0	0	0	0	0	1	1	1	13	0	0	0	0	0	0	0	0	3	1	1	1	0	0	0	3	0	1	3	1	0	1	2	2	1	0	2	0	1	0	0	1
B. breve	Human	Bifido_07	GCA_900157125.1	2	0	0	0	0	0	1	0	0	0	1	1	1	12	0	0	0	0	0	0	0	0	4	1	0	1	0	0	0	5	0	0	1	1	0	1	2	3	1	0	2	0	1	0	0	1
B. breve	Human	SC95	GCA_006546585.1	1	0	0	0	0	0	1	0	0	0	1	1	1	13	0	0	0	0	0	0	0	0	2	1	0	3	0	0	1	4	0	1	2	1	0	1	2	3	1	0	2	0	1	0	0	0
B. breve	Human	JR01	GCA_009931415.1	1	0	0	0	0	0	1	0	0	0	1	1	1	12	0	0	0	0	0	0	0	0	2	1	1	1	0	0	0	5	0	0	1	1	0	1	2	2	0	0	2	0	0	0	0	0
B. breve	Infant	JTL	GCA_013267755.1	2	0	0	0	0	0	1	0	0	0	1	1	1	14	0	0	0	0	0	0	0	0	4	1	1	1	0	0	0	5	0	1	2	1	0	1	2	2	0	0	2	0	1	0	0	1
B. breve	Infant	MCC 1094	GCA_001264095.1	1	0	0	0	0	0	1	0	0	0	1	1	1	15	0	0	0	0	0	0	0	0	4	1	1	2	0	0	0	5	1	2	3	1	0	1	3	2	0	0	4	0	0	0	0	1
B. breve	Infant	BR3	GCA_001281425.1	2	0	0	0	0	0	1	0	0	0	1	1	1	10	0	0	0	0	0	0	0	0	4	1	0	1	0	0	0	3	0	1	2	1	1	1	2	2	0	0	2	0	1	0	0	1
B. breve	Infant	MCC 1114	GCA_001263855.1	1	0	0	0	0	0	1	0	0	0	1	1	1	13	0	0	0	0	0	0	0	0	3	1	0	1	0	0	0	5	0	2	2	1	0	1	3	2	0	0	2	0	1	0	0	1
B. breve	Infant	LMG 13208	GCA_000741125.1	3	0	0	0	0	0	1	0	0	0	1	0	1	14	0	1	0	0	1	0	0	0	5	1	1	1	0	0	0	7	2	0	2	1	0	1	2	2	0	0	1	0	1	1	0	0
B. breve	Infant	BBRI4	GCA_001189355.1	2	0	0	0	0	0	1	0	0	0	1	1	1	15	0	0	0	0	0	0	0	0	2	1	0	3	0	0	0	3	0	1	2	1	0	1	2	3	1	0	2	0	1	0	0	0
B. breve	Infant	S141.3	GCA_001576875.1	2	0	0	0	0	0	1	0	0	0	1	1	1	13	0	0	0	0	0	0	0	0	2	1	1	2	0	0	0	4	0	2	3	1	0	1	3	3	1	0	2	0	0	0	0	0
B. breve	Infant	1900B	GCA_002075865.1	1	0	0	0	0	0	1	0	0	0	1	1	1	12	0	0	0	0	0	0	0	0	2	1	1	1	0	0	0	5	0	0	1	1	0	1	2	2	0	0	2	0	0	0	0	0
B. breve	Infant	1891B	GCA_002076055.1	1	0	0	0	0	0	1	0	0	0	1	1	1	14	0	0	0	0	0	0	0	0	3	1	0	2	0	0	0	6	0	0	0	0	1	1	2	3	1	0	2	0	1	0	0	0
B. breve	Infant	1889B	GCA_002076075.1	1	0	0	0	0	0	1	0	0	0	1	1	1	12	0	0	0	0	0	0	0	0	3	1	0	2	0	0	0	6	0	0	0	0	1	1	2	3	1	0	2	0	1	0	0	0
B. breve	Infant	7E	GCA_002271275.1	1	0	0	0	0	0	1	0	0	0	1	1	1	12	0	0	0	0	0	0	0	0	3	1	0	1	0	0	0	4	0	1	1	1	1	1	3	2	0	0	2	0	1	0	0	1
B. breve	Infant	DRBB26	GCA_002838225.1	1	0	0	0	0	0	1	0	0	0	1	0	1	13	0	1	0	0	0	0	0	0	3	1	0	3	0	0	1	5	0	2	2	1	1	1	3	2	0	0	2	0	0	0	0	0
B. breve	Infant	NRBB56	GCA_002838425.1	1	0	0	0	0	0	1	0	0	0	1	1	1	13	0	1	0	0	0	0	0	0	4	1	0	2	0	0	1	4	0	2	2	1	1	1	3	2	0	0	2	0	1	0	0	1
B. breve	Infant	DRBB27	GCA_002838445.1	1	0	0	0	0	0	1	0	0	0	1	1	1	13	0	1	0	0	1	0	0	0	3	1	0	2	0	0	1	5	1	2	3	1	1	1	3	2	0	0	2	0	1	1	0	0
B. breve	Infant	017W439	GCA_002838465.1	1	0	0	0	0	0	1	0	0	0	1	1	1	13	0	0	0	0	0	0	0	0	3	1	0	1	0	0	0	4	0	2	2	1	0	1	3	2	0	0	2	0	1	0	0	1
B. breve	Infant	215W447a	GCA_002838485.1	1	0	0	0	0	0	1	0	0	0	1	1	1	13	0	0	0	0	0	0	0	0	2	1	1	1	0	0	0	3	0	0	1	1	0	1	2	2	1	0	2	0	1	0	0	0
B. breve	Infant	DRBB28	GCA_002838505.1	2	0	0	0	0	0	1	0	0	0	1	1	1	14	0	0	0	0	0	0	0	0	4	1	1	1	0	0	0	5	0	1	2	1	0	1	2	2	0	0	2	0	1	0	0	1
B. breve	Infant	180W83	GCA_002838525.1	1	0	0	0	0	0	1	0	0	0	1	1	1	12	0	0	0	0	0	0	0	0	3	1	0	1	0	0	0	5	0	0	1	1	0	1	2	2	0	0	2	0	1	0	0	1
B. breve	Infant	082W48	GCA_002838545.1	1	0	0	0	0	0	1	0	0	0	1	1	1	12	0	0	0	0	0	0	0	0	3	1	0	1	0	0	0	4	0	0	1	0	0	1	2	2	0	0	2	0	1	0	0	1
B. breve	Infant	139W423	GCA_002838565.1	1	0	0	0	0	0	1	0	0	0	1	1	1	13	0	0	0	0	0	0	0	0	2	1	0	3	0	0	1	4	0	1	2	1	0	1	2	3	1	0	2	0	1	0	0	0
B. breve	Infant	CNCM I-4321	GCA_002838585.1	1	0	0	0	0	0	1	0	0	0	1	0	1	14	0	0	0	0	0	0	0	0	3	1	0	1	0	0	0	5	0	1	3	1	0	1	2	3	1	0	2	0	1	0	0	1
B. breve	Infant	NRBB18	GCA_002838605.1	2	0	0	0	0	0	1	0	0	0	1	0	1	13	0	1	0	0	0	0	0	0	4	1	0	1	0	0	0	5	0	1	2	1	0	1	3	2	0	0	2	0	0	0	0	1
B. breve	Infant	NRBB49	GCA_002838685.1	2	0	0	0	0	0	1	0	0	0	0	1	1	14	0	0	0	0	0	0	0	0	5	1	1	1	0	0	0	5	1	1	2	1	1	1	0	2	0	0	1	0	1	0	0	1
B. breve	Infant	lw01	GCA_003860285.1	1	0	0	0	0	0	1	0	0	0	1	0	1	13	0	0	0	0	0	0	0	0	2	1	0	2	0	0	0	6	0	0	1	1	1	1	2	3	1	0	2	0	1	0	0	0
B. breve	Infant	BR03	GCA_004319685.1	2	0	0	0	0	0	1	0	0	0	1	1	1	11	0	0	0	0	1	0	0	0	2	1	0	2	0	0	0	3	1	1	1	1	0	1	3	2	0	0	2	0	0	1	0	0
B. breve	Infant	IDCC4401	GCA_009429085.1	1	0	0	0	0	0	1	0	0	0	1	1	1	13	0	0	0	0	0	0	0	0	3	1	0	1	0	0	0	5	0	2	2	1	0	1	3	2	0	0	2	0	1	0	0	1
B. breve	Infant	JSRL01	GCA_009498435.1	1	0	0	0	0	0	1	0	0	0	1	1	0	12	0	0	0	0	0	0	0	0	2	1	0	1	0	0	0	5	0	0	1	1	0	1	2	2	0	0	2	0	0	0	0	0
B. breve	Infant	NCTC11815	GCA_900637145.1	1	0	0	0	0	0	0	0	0	0	1	0	1	12	0	1	0	0	1	0	0	0	3	1	0	1	0	0	0	5	1	2	3	1	1	1	3	2	0	0	2	0	1	1	0	0
B. breve	Infant	LH_24	GCA_902505445.1	1	0	0	0	0	0	1	0	0	0	1	0	1	12	0	1	0	0	1	0	0	0	3	1	0	1	0	0	0	4	1	2	2	1	1	1	3	2	0	0	2	0	1	1	0	0
B. breve	Infant	LH_21	GCA_902505485.1	2	0	0	0	0	0	2	0	0	0	1	0	1	11	0	0	0	0	0	0	0	0	2	1	0	0	0	0	0	4	0	0	1	1	0	1	1	2	1	0	1	0	0	0	0	0
B. breve	Human Milk	CECT 7263	GCA_000247755.2	3	0	0	0	0	0	1	0	0	0	1	1	1	12	0	1	0	0	0	0	0	0	4	1	0	2	0	0	0	4	1	1	1	1	1	1	3	2	0	0	2	0	0	0	0	0
B. breve	Human Milk	31L	GCA_000568875.1	2	0	0	0	0	0	1	0	0	0	1	1	1	13	0	0	0	0	0	0	0	0	3	1	0	1	0	0	0	5	0	1	2	1	0	1	2	2	0	0	2	0	1	0	0	1
B. breve	Human Milk	2L	GCA_000568895.1	1	0	0	0	0	0	1	0	0	0	1	1	1	12	0	0	0	0	0	0	0	0	2	1	1	1	0	0	0	5	0	0	1	1	0	1	2	2	0	0	2	0	0	0	0	0
B. breve	Human Milk	CECT7263	GCA_002027265.1	1	0	0	0	0	0	1	0	0	0	1	0	1	15	0	0	0	0	0	0	0	0	2	1	0	2	0	0	0	4	0	1	2	1	0	1	2	3	1	0	2	0	0	0	0	0
B. breve	Human Milk	INIA P734	GCA_901980275.1	0	0	0	0	0	0	1	0	0	0	1	0	1	13	0	0	0	0	0	0	0	0	2	1	1	1	0	0	0	3	0	1	1	1	0	1	3	2	1	0	2	0	1	0	0	0
B. breve	Food product - supplement	LMG S-29190	GCA_002914865.1	1	0	0	0	0	0	1	0	0	0	1	0	1	14	0	1	0	0	0	0	0	0	3	1	0	1	0	0	0	5	0	2	2	1	0	1	3	3	1	0	2	0	1	0	0	1
B. breve	Fermented food	UBBR-01	GCA_004802595.1	3	0	0	0	0	0	1	0	0	0	1	1	1	15	0	0	0	0	1	0	0	0	2	1	0	3	0	0	0	5	1	1	1	1	1	1	3	2	1	0	2	0	1	1	0	0
B. breve	Commercial dietary supplements	DS15_17	GCA_003095095.1	1	0	0	0	0	0	1	0	0	0	1	1	1	13	0	0	0	0	0	0	0	0	2	1	0	4	0	0	0	5	0	1	2	1	0	1	2	2	0	0	2	0	1	0	0	0
B. breve	Vagina	ACS-071-V-Sch8b	GCA_000213865.1	2	0	0	0	0	0	1	0	0	1	1	1	1	14	0	0	0	0	0	0	0	0	4	1	1	3	0	0	0	5	0	1	2	1	0	1	2	2	0	0	2	0	1	0	0	1
B. breve	Vagina	JCP7499	GCA_000466545.1	1	0	0	0	0	0	1	0	0	0	1	1	1	13	0	0	0	0	1	0	0	0	3	1	0	1	0	0	0	6	1	0	1	1	0	1	2	2	0	0	2	0	1	1	0	0
B. breve	Vagina	GED8481	GCA_001546235.1	2	0	0	0	0	0	1	0	0	0	1	1	1	14	0	0	0	0	0	0	0	0	2	1	0	1	0	0	0	5	0	2	3	1	0	1	2	2	0	0	2	0	1	0	0	0
B. breve	Vagina	N6D12	GCA_003370105.1	1	0	0	0	0	0	1	0	0	0	1	1	1	13	0	1	0	0	0	0	0	0	3	1	0	1	0	0	0	5	0	1	2	1	0	1	2	3	1	0	2	0	1	0	0	0
B. breve	Vagina	W20-13	GCA_003370125.1	2	0	0	0	0	0	1	0	0	0	1	1	1	13	0	0	0	0	0	0	0	0	2	1	0	1	0	0	0	4	0	1	2	1	0	1	2	2	0	0	2	0	1	0	0	0
B. breve	Vagina	S12-4	GCA_003370155.1	1	0	0	0	0	0	1	0	0	0	1	0	1	13	0	1	0	0	1	0	0	0	3	1	0	2	0	0	0	5	1	2	3	1	1	1	3	2	0	0	2	0	1	1	0	0
B. breve	Vagina	322-1	GCA_003370175.1	1	0	0	0	0	0	1	0	0	0	1	1	1	12	0	0	0	0	0	0	0	0	3	1	1	2	0	0	0	3	0	0	1	1	0	1	2	3	1	0	2	0	1	0	0	1
B. breve	Vagina	30-1	GCA_003370195.1	1	0	0	0	0	0	1	0	0	0	1	1	1	13	0	0	0	0	0	0	0	0	2	1	0	1	0	0	0	6	0	1	2	1	0	1	2	3	1	0	2	0	1	0	0	0
B. breve	Vagina	W56	GCA_003370265.1	1	0	0	0	0	0	1	0	0	0	1	1	1	13	0	0	0	0	0	0	0	0	2	1	0	1	0	0	0	6	0	1	2	1	0	1	2	3	1	0	2	0	1	0	0	0
B. breve	Vagina	91-1	GCA_003370295.1	1	0	0	0	0	0	1	0	0	0	1	1	1	12	0	0	0	0	0	0	0	0	2	1	1	1	0	0	0	5	0	0	1	1	0	1	2	2	0	0	2	0	0	0	0	0
B. breve	Free-living	LMC520	GCA_001990225.1	1	0	0	0	0	0	1	0	0	0	1	0	1	15	0	0	0	0	0	0	0	0	2	1	0	2	0	0	0	4	0	1	2	1	0	1	2	3	1	0	2	0	0	0	0	0
B. breve	Basil	B.breve_2_mod	GCA_902167575.1	1	0	0	0	0	0	1	0	0	0	1	0	1	11	0	0	0	0	1	0	0	0	3	1	0	1	0	0	0	4	1	2	2	1	1	1	3	1	0	0	2	0	1	1	0	0
B. breve		UCC2003	GCA_000220135.1	1	0	0	0	0	0	1	0	0	0	1	1	1	13	0	0	0	0	0	0	0	0	2	1	1	1	0	0	0	3	0	0	1	1	0	1	2	2	1	0	2	0	1	0	0	0
B. breve		HPH0326	GCA_000411435.1	1	0	0	0	0	0	1	0	0	0	1	1	1	12	0	0	0	0	0	0	0	0	3	1	0	1	0	0	0	5	0	1	1	1	0	1	3	2	0	0	2	0	1	0	0	1
B. breve		12L	GCA_000568955.1	1	0	0	0	0	0	1	0	0	0	1	1	1	12	0	0	0	0	0	0	0	0	2	1	1	1	0	0	0	5	0	0	1	1	0	1	2	2	0	0	2	0	0	0	0	0
B. breve		JCM 7017	GCA_000568975.1	2	0	0	0	0	0	1	0	0	0	1	0	1	14	0	1	0	0	0	0	0	0	4	1	0	0	0	0	0	4	0	1	0	1	0	1	3	2	0	0	2	0	0	0	0	0
B. breve		JCM 7019	GCA_000569015.1	2	0	0	0	0	0	1	0	0	0	1	0	1	14	0	0	0	0	0	0	0	0	4	1	1	1	0	0	0	5	0	0	2	1	0	1	2	2	1	0	2	0	1	0	0	1
B. breve		NCFB 2258	GCA_000569035.1	0	0	0	0	0	0	1	0	0	0	0	0	1	12	0	0	0	0	0	0	0	0	2	1	0	1	0	0	0	4	0	1	2	1	0	1	0	2	1	0	1	1	0	0	0	0
B. breve		689b	GCA_000569055.1	2	0	0	0	0	0	1	0	0	0	1	2	1	14	0	0	0	0	0	0	0	0	5	1	0	1	0	0	0	6	1	2	2	1	1	1	3	2	0	0	2	0	1	0	0	1
B. breve		S27	GCA_000569075.1	1	0	0	0	0	0	1	0	0	0	1	1	1	13	0	0	0	0	0	0	0	0	3	1	0	1	0	0	0	5	0	2	2	1	0	1	3	2	0	0	2	0	1	0	0	1
B. breve		JCM 1192	GCA_001025175.1	1	0	0	0	0	0	1	0	0	0	1	1	1	12	0	0	0	0	0	0	0	0	2	1	1	1	0	0	0	5	0	0	1	1	0	1	2	2	0	0	2	0	0	0	0	0
B. breve		FDAARGOS_561	GCA_003813065.1	1	0	0	0	0	0	1	0	0	0	1	0	1	13	0	0	0	0	0	0	0	0	2	1	0	2	0	0	0	6	0	0	1	1	1	1	2	3	1	0	2	0	1	0	0	0
B. breve		BIO6018	GCA_008868405.1	2	0	0	0	0	0	1	0	0	0	1	2	1	14	0	0	0	0	0	0	0	0	4	0	0	1	0	0	0	5	1	2	2	1	1	1	3	2	0	0	2	0	1	0	0	1
B. breve		RP2	GCA_900102865.1	1	0	0	0	0	0	1	0	0	0	1	1	1	11	0	0	0	0	0	0	0	0	3	1	0	1	0	0	0	5	0	1	2	1	0	1	2	2	0	0	2	0	1	0	0	1
B. breve		MC1	GCA_901212525.1	1	0	0	0	0	0	1	0	0	0	1	0	1	11	0	1	0	0	1	0	0	0	3	1	0	1	0	0	0	5	1	2	3	1	1	1	3	2	0	0	2	0	1	1	0	0
B. breve		B.breve_1_mod	GCA_902167875.1	1	0	0	0	0	0	1	0	0	0	1	1	1	10	0	0	0	0	0	0	0	0	2	1	0	0	0	0	0	3	0	0	1	1	1	1	2	3	0	0	2	0	1	0	0	0
B. breve		JG_Bg463	GCA_902167895.1	1	0	0	0	0	0	1	0	0	0	1	0	1	10	0	0	0	0	0	0	0	0	3	1	0	2	0	0	0	5	0	0	2	1	0	1	2	2	0	0	2	0	1	0	0	0
B. breve		MGYG-HGUT-02469	GCA_902387425.1	1	0	0	0	0	0	1	0	0	0	1	1	1	11	0	0	0	0	0	0	0	0	4	1	1	0	0	0	0	4	1	1	2	1	0	1	1	2	0	0	1	0	1	0	0	0
B. longum subsp. infantis	Human	CCUG 52486	GCA_000155415.1	0	0	1	0	0	0	1	1	1	0	0	2	1	10	0	0	0	0	0	0	0	0	1	1	0	0	0	1	0	3	1	2	1	0	1	0	0	2	17	0	1	4	0	0	0	0
B. longum subsp. infantis	Human	EK3	GCA_000730125.1	2	0	0	0	1	0	1	1	0	0	1	0	1	8	0	0	0	0	0	0	0	0	2	2	0	1	0	0	1	1	0	0	2	2	1	3	1	2	2	0	2	1	0	0	0	0
B. longum subsp. infantis	Human	BIC1206122787	GCA_000825005.1	1	0	0	0	0	0	1	0	0	0	1	0	1	8	0	0	0	0	0	0	0	0	2	3	0	3	0	0	1	2	0	0	3	2	1	2	0	3	1	0	2	1	0	0	0	0
B. longum subsp. infantis	Human	BIC1401111250	GCA_000825045.1	1	0	0	0	0	0	1	0	0	0	1	0	1	8	0	0	0	0	0	0	0	0	2	3	0	3	0	0	1	2	0	0	3	2	1	2	0	3	1	0	2	1	0	0	0	0
B. longum subsp. infantis	Human	BI-G201	GCA_013204895.1	2	0	0	0	1	0	1	1	0	0	1	0	1	7	0	0	0	0	0	0	0	0	2	2	0	1	0	0	1	1	0	0	2	2	1	3	1	2	2	0	2	1	0	0	0	0
B. longum subsp. infantis	Infant	BT1	GCA_001281305.1	0	0	0	0	0	0	1	0	0	0	1	0	1	8	0	0	0	0	0	0	0	0	2	3	0	0	0	0	3	4	0	0	1	2	1	2	0	2	0	0	3	1	0	0	0	0
B. longum subsp. infantis	Infant	TPY12-1	GCA_001870755.1	1	0	0	0	0	0	1	0	0	1	1	0	1	8	1	0	0	0	0	0	0	0	2	2	1	1	0	0	2	3	0	2	1	2	1	2	0	2	2	0	3	1	0	0	0	0
B. longum subsp. infantis	Infant	1888B	GCA_002076025.1	0	0	0	0	0	0	1	0	0	0	1	0	1	8	0	0	0	0	0	0	0	0	2	3	0	0	0	0	2	4	0	0	1	2	1	2	0	2	0	0	3	1	0	0	0	0
B. longum subsp. infantis	Infant	Bi-26	GCA_004919065.2	2	0	0	0	1	0	1	1	0	0	1	0	1	8	0	0	0	0	0	0	0	0	2	2	0	1	0	0	3	1	0	0	2	2	1	3	1	2	2	0	2	1	0	0	0	0
B. longum subsp. infantis	Infant	BIO5478	GCA_008868445.1	2	0	0	0	1	0	1	1	0	0	1	0	1	8	0	0	0	0	0	0	0	0	2	2	0	1	0	0	3	1	0	0	2	2	1	3	1	2	2	0	2	1	0	0	0	0
B. longum subsp. infantis	Infant	LH_665	GCA_902505515.1	1	0	0	0	0	0	1	0	0	1	1	0	1	8	1	0	0	1	0	0	0	0	2	2	0	1	0	0	1	2	0	0	3	2	1	3	1	3	1	0	2	1	0	0	0	0
B. longum subsp. infantis	Infant	LH_666	GCA_902505525.1	1	0	0	0	0	0	1	1	0	1	1	0	1	8	1	0	0	1	0	0	0	0	2	2	0	1	0	0	2	2	0	0	3	2	1	3	1	3	3	0	2	1	0	0	0	0
B. longum subsp. infantis	Infant	LH_23	GCA_902505535.1	1	0	0	0	1	0	1	0	0	1	1	0	1	9	1	0	0	0	0	0	0	0	2	2	0	2	0	0	2	2	0	1	3	2	1	2	0	3	2	0	2	1	0	0	0	0
B. longum subsp. infantis	Infant	LH_664	GCA_902505555.1	1	0	0	0	0	0	1	0	0	1	1	0	1	8	1	0	0	1	0	0	0	0	2	2	0	1	0	0	3	2	0	0	3	2	1	3	1	3	1	0	2	1	0	0	0	0
B. longum subsp. infantis	Fermented food	UBBI-01	GCA_004803425.1	1	0	0	0	1	0	1	0	0	1	1	0	1	9	1	0	0	1	0	0	0	0	2	2	0	1	0	0	1	2	0	1	3	2	1	2	0	2	1	0	3	1	0	0	0	0
B. longum subsp. infantis		ATCC 15697	GCA_000020425.1	1	0	0	0	0	0	1	0	0	0	1	0	1	8	0	0	0	1	0	0	0	0	2	3	0	4	0	0	3	2	0	0	3	2	1	2	0	3	1	0	2	1	0	0	0	0
B. longum subsp. infantis		157F	GCA_000196575.1	0	0	1	0	0	0	1	1	1	0	1	2	1	9	0	0	0	0	0	0	0	0	2	1	1	1	0	1	0	5	1	2	1	0	1	2	0	2	7	0	2	4	1	0	0	1
B. longum subsp. infantis		JCM 1222	GCA_000269965.1	1	0	0	0	0	0	1	0	0	0	1	0	1	8	0	0	0	1	0	0	0	0	2	3	0	4	0	0	3	2	0	0	3	2	1	2	0	3	1	0	2	1	0	0	0	0
B. longum subsp. infantis		DSM 20088	GCA_000771105.1	1	0	0	0	0	0	1	0	0	0	1	0	1	8	0	0	0	0	0	0	0	0	2	3	0	2	0	0	1	2	0	0	3	2	1	0	0	3	1	0	2	1	0	0	0	0
B. longum subsp. infantis	Free-living	BIC1307292462	GCA_000825025.1	1	0	0	0	0	0	1	0	0	0	1	0	1	8	0	0	0	0	0	0	0	0	2	3	0	3	0	0	1	2	0	0	5	2	1	2	0	3	1	0	2	1	0	0	0	0
B. longum subsp. infantis	Free-living	BIC1401212621a	GCA_000825065.1	1	0	0	0	0	0	1	0	0	0	1	0	1	8	0	0	0	0	0	0	0	0	2	3	0	3	0	0	1	2	0	0	3	2	1	2	0	3	1	0	2	1	0	0	0	0
B. longum subsp. infantis	Free-living	BIC1401212621b	GCA_000825085.1	1	0	0	0	0	0	1	0	0	0	1	0	1	8	0	0	0	0	0	0	0	0	2	3	0	3	0	0	1	2	0	0	3	2	1	2	0	3	1	0	2	1	0	0	0	0
B. longum subsp. infantis	Free-living	BIB1401242951	GCA_000825105.1	1	0	0	0	0	0	1	0	0	0	1	0	1	8	0	0	0	0	0	0	0	0	2	3	0	3	0	0	1	2	0	0	3	2	1	2	0	3	1	0	2	1	0	0	0	0
B. longum subsp. infantis	Free-living	BIB1401272845a	GCA_000825125.1	1	0	0	0	0	0	1	0	0	0	1	0	1	8	0	0	0	0	0	0	0	0	2	3	0	3	0	0	1	2	0	0	3	2	1	2	0	3	1	0	2	1	0	0	0	0
B. longum subsp. infantis	Free-living	BIB1401272845b	GCA_000825145.1	1	0	0	0	0	0	1	0	0	0	1	0	1	8	0	0	0	0	0	0	0	0	2	3	0	3	0	0	1	2	0	0	3	2	1	2	0	3	1	0	2	1	0	0	0	0
B. longum subsp. infantis	Frozen shrimp	S5	GCA_902167565.1	0	0	0	0	1	0	1	0	0	0	1	0	1	8	0	0	0	2	0	0	0	0	1	3	0	0	0	0	4	2	0	1	0	2	1	4	1	2	1	0	3	1	0	0	0	0
B. longum subsp. infantis	Frozen shrimp	S4	GCA_902167595.1	0	0	0	0	1	0	1	0	0	0	1	0	1	8	1	0	0	0	0	0	0	0	3	3	0	2	0	0	1	4	1	0	1	2	1	2	0	2	1	0	2	1	0	0	0	0
B. longum subsp. infantis	Frozen shrimp	3_mod	GCA_902167615.1	0	0	0	0	0	0	1	0	0	0	1	0	1	11	0	0	0	0	0	0	0	0	1	2	0	1	0	0	2	2	0	1	1	2	1	2	0	2	1	0	1	1	1	0	0	0
B. longum subsp. infantis	Sesame seeds	2_mod	GCA_902167555.1	1	0	0	0	0	0	1	0	0	0	1	0	1	9	1	0	0	1	0	1	0	0	3	2	0	0	0	0	3	1	0	1	3	2	1	3	1	2	2	0	2	1	0	0	0	0
B. longum subsp. infantis	Cumin seeds	S6	GCA_902167885.1	1	0	0	0	0	0	1	0	0	0	1	0	1	8	0	0	0	1	0	0	0	0	2	3	0	4	0	0	3	2	0	0	3	2	1	2	0	3	1	0	2	1	0	0	0	0
B. longum subsp. infantis		CECT 7210	GCA_001051015.2	0	0	1	0	0	0	1	1	1	0	1	2	1	9	0	0	0	0	0	0	0	0	1	1	0	2	0	1	0	5	1	3	1	0	2	2	0	2	12	0	2	5	1	0	0	0
B. longum subsp. infantis		IN-07	GCA_001686105.1	0	0	1	0	0	0	1	0	0	1	1	0	1	9	1	0	0	1	0	0	0	0	1	2	0	1	0	0	2	4	0	0	2	2	1	2	0	3	1	0	3	1	0	0	0	0
B. longum subsp. infantis		IN-F29	GCA_001686125.1	0	0	0	0	1	0	1	0	0	0	2	0	1	8	0	0	0	1	0	0	0	0	1	3	0	0	0	0	4	2	0	0	1	2	1	1	0	2	0	0	3	1	0	0	0	0
B. longum subsp. infantis		CECT 7210	GCA_002900845.1	0	0	1	0	0	0	1	1	1	0	1	2	1	9	0	0	0	0	0	0	0	0	1	1	0	2	0	1	0	5	1	3	1	0	2	2	0	2	12	0	2	5	1	0	0	0
B. longum subsp. infantis		NCTC13219	GCA_900445755.1	0	0	0	0	0	0	1	0	0	0	1	0	1	7	0	0	0	1	0	0	0	0	1	3	0	4	0	0	3	2	0	0	1	1	1	2	0	3	1	0	2	1	0	0	0	0
B. longum subsp. infantis		NCTC11817	GCA_900637215.1	1	0	0	0	0	0	1	0	0	0	1	0	1	8	0	0	0	1	0	0	0	0	2	3	0	4	0	0	3	2	0	0	3	2	1	2	0	3	1	0	2	1	0	0	0	0
B. longum subsp. infantis		BG463	GCA_902167775.1	1	0	0	0	1	0	1	0	0	0	1	0	1	8	0	0	0	0	0	0	0	0	2	2	0	1	0	0	1	3	0	0	1	2	1	2	0	2	1	0	2	1	0	0	0	0
B. longum subsp. infantis		Bg463	GCA_902167915.1	1	0	0	0	1	0	1	0	0	0	1	0	1	5	0	0	0	0	0	0	0	0	2	2	0	1	0	0	1	3	0	0	1	2	0	2	0	2	1	0	2	1	0	0	0	0
B. longum subsp. suis	Calf	VT155	SAMN17849156	0	0	1	0	0	0	1	0	0	0	1	1	1	8	0	0	0	0	0	0	1	0	1	2	0	2	0	1	0	4	1	0	1	0	0	2	2	2	1	0	2	1	0	0	0	0
B. longum subsp. suis	Calf	VT247	SAMN17849157	0	0	1	0	0	0	1	0	0	0	1	1	1	9	0	0	0	0	0	0	1	0	0	1	0	2	0	1	0	5	1	0	0	0	0	2	2	2	1	0	2	1	1	0	0	0
B. longum subsp. suis	Pig	SU851	GCA_016882605.1	0	0	1	0	0	0	1	0	0	0	1	1	1	8	0	0	0	0	0	0	0	0	1	1	0	2	0	1	0	5	1	0	1	1	0	1	2	2	6	0	2	2	1	0	0	0
B. longum subsp. suis	Pig	LMG 21814	GCA_000741625.1	0	0	1	0	0	0	1	0	0	0	1	1	1	8	0	0	0	0	0	0	0	0	1	1	0	1	0	1	0	5	1	0	1	1	0	1	2	2	7	0	2	2	1	0	0	0
B. longum subsp. suis	Pig	DSM 20211	GCA_000771285.1	0	0	0	0	0	0	1	1	1	0	1	1	1	10	0	0	0	0	0	0	0	0	1	1	0	1	0	0	1	3	1	1	1	1	0	1	2	3	12	0	2	3	1	0	0	0
B. moukalabense	Gorilla	GG01	GCA_005405645.1	1	0	0	0	0	0	0	0	0	0	1	1	0	15	0	0	0	0	0	0	0	0	5	0	1	2	2	1	1	15	1	3	1	0	0	4	0	4	11	0	3	2	2	0	0	0
B. moukalabense	Gorilla	GB01	GCA_005405665.1	1	0	0	0	0	0	0	0	0	0	1	1	0	15	0	0	0	0	0	0	0	0	5	0	1	2	2	1	1	15	4	0	1	0	0	4	0	4	11	0	3	2	2	0	0	0
B. moukalabense	Chimpanzee	CD14	GCA_005405785.1	1	0	0	1	0	0	0	0	1	0	1	2	0	15	0	1	0	0	0	0	0	0	5	0	0	2	2	1	1	14	1	4	1	0	0	4	0	4	10	0	3	2	2	0	0	0
B. moukalabense	Chimpanzee	CD16	GCA_005405805.1	1	0	0	0	0	0	0	0	0	0	1	1	0	15	0	0	0	0	0	0	0	0	5	0	1	1	2	1	1	13	1	3	1	0	0	4	0	4	8	0	4	2	2	0	0	0
B. moukalabense	Elephant	EB43	GCA_005405845.1	1	0	0	1	0	0	0	0	1	0	1	2	0	15	0	1	0	0	0	0	0	0	5	0	0	2	2	1	1	14	1	4	1	0	0	4	0	4	10	0	3	2	2	0	0	0
B. moukalabense	Elephant	EB44	GCA_005405865.1	1	0	0	0	0	0	0	0	0	0	1	1	0	15	0	0	0	0	0	0	0	0	5	0	1	1	2	1	1	13	1	3	1	0	0	4	0	4	8	0	4	2	2	0	0	0
B. adolescentis	Human	BBMN23	GCA_000817995.1	0	0	0	0	0	0	0	1	1	0	0	2	0	17	0	0	0	0	0	0	0	0	1	0	0	3	0	0	0	6	1	2	2	0	0	2	1	3	8	0	2	1	0	0	0	0
B. adolescentis	Human	IVS-1	GCA_000829865.1	2	0	0	0	0	0	0	1	0	0	0	1	0	7	0	0	0	0	0	0	0	0	4	0	1	1	1	0	0	5	1	1	1	0	1	2	0	2	7	0	2	1	0	0	0	0
B. adolescentis	Human	S150	GCA_001010915.1	1	0	0	0	0	0	0	1	0	0	0	2	0	14	0	0	0	0	0	0	0	0	3	0	0	3	0	0	0	5	1	2	1	0	0	4	0	3	7	0	1	1	0	0	0	0
B. adolescentis	Human	2789STDY5834850	GCA_001406215.1	1	0	0	0	0	0	0	1	0	0	0	1	0	17	0	0	0	0	0	0	0	0	3	0	1	1	0	0	0	6	1	1	2	0	1	2	1	4	7	0	2	1	0	0	0	0
B. adolescentis	Human	2789STDY5608824	GCA_001406455.1	1	0	0	0	0	0	0	1	0	0	0	2	0	15	0	0	0	0	0	0	0	0	3	0	0	2	0	0	0	6	1	3	1	0	1	4	1	4	7	0	2	1	0	0	0	0
B. adolescentis	Human	2789STDY5608862	GCA_001406735.1	2	0	0	0	0	0	0	1	0	0	0	1	0	15	0	0	0	0	0	0	0	0	4	0	0	2	1	0	0	6	1	1	2	0	0	2	1	4	8	0	3	1	0	0	0	0
B. adolescentis	Human	Km 4	GCA_001756865.1	1	0	0	0	0	0	0	1	0	0	0	1	0	15	0	0	0	0	0	0	0	0	3	0	0	2	0	0	0	5	1	2	1	0	0	2	0	4	8	0	2	1	0	0	0	0
B. adolescentis	Infant	1892B	GCA_002075965.1	1	0	0	0	0	0	0	1	0	0	0	1	0	17	0	0	0	0	0	0	0	0	3	0	0	2	0	0	0	6	1	2	2	0	0	3	0	4	7	0	2	1	0	0	0	0
B. adolescentis	Human	42B	GCA_002107925.1	1	0	0	0	0	0	0	1	0	0	0	1	0	16	0	0	0	0	0	0	0	0	3	0	0	3	0	0	0	6	1	1	1	0	1	3	0	4	7	0	1	1	0	0	0	0
B. adolescentis	Human	70B	GCA_002107955.1	1	0	0	0	0	0	0	1	0	0	0	2	0	14	0	0	0	0	0	0	0	0	3	0	0	1	0	0	0	6	3	1	1	0	1	4	1	4	9	0	2	1	0	0	1	0
B. adolescentis	Human	AL12-4	GCA_002107975.1	1	0	0	0	0	0	0	2	0	0	0	1	0	15	0	0	0	0	0	0	0	0	4	0	0	1	1	1	0	6	0	2	2	0	1	2	1	3	9	0	1	1	0	0	0	0
B. adolescentis	Human	LMG 10734	GCA_002107995.1	1	0	0	0	0	0	0	1	1	0	0	2	0	17	0	0	0	0	0	0	0	0	3	0	0	1	0	0	0	5	1	1	1	0	1	2	0	4	8	0	2	1	0	0	0	0
B. adolescentis	Human	487B	GCA_002108015.1	1	0	0	0	0	0	0	2	0	0	0	2	0	15	0	0	0	0	0	0	0	0	3	0	1	3	0	0	0	5	1	1	2	0	1	3	0	3	9	0	2	1	0	0	0	0
B. adolescentis	Human	703B	GCA_002108035.1	0	1	0	0	0	0	0	1	0	0	0	1	0	13	0	0	0	0	0	0	0	0	3	0	0	1	1	1	0	6	1	1	2	0	1	2	1	3	9	0	2	2	0	0	0	0
B. adolescentis	Human	BIO5485	GCA_013249115.1	2	0	0	0	0	0	0	1	0	0	0	1	0	10	0	0	0	0	0	0	0	0	3	0	0	1	1	0	0	5	1	1	2	0	1	2	1	3	6	0	2	2	0	0	0	0
B. adolescentis	Human	NCTC11814	GCA_900445615.1	2	0	0	0	0	0	0	1	0	0	0	1	0	14	0	0	0	0	0	0	0	0	3	0	0	1	1	1	0	6	1	1	2	0	2	2	1	4	7	0	2	2	0	0	0	0
B. adolescentis		ATCC 15703	GCA_000010425.1	2	0	0	0	0	0	0	1	0	0	0	1	0	13	0	0	0	0	0	0	0	0	3	0	0	1	1	1	0	6	1	1	2	0	1	2	1	3	7	0	2	2	0	0	0	0
B. adolescentis		L2-32	GCA_000154085.1	1	0	0	0	0	0	0	1	0	0	0	2	0	19	0	0	0	0	0	0	0	0	3	0	0	3	0	0	0	6	1	1	1	0	1	4	1	4	7	0	2	1	0	0	0	0
B. adolescentis		S3	GCA_000435235.1	0	0	0	0	0	0	0	0	1	0	0	2	0	15	0	0	0	0	0	0	0	0	3	0	0	0	0	0	0	6	1	1	1	0	1	2	1	4	7	0	3	1	0	0	0	0
B. adolescentis		22L	GCA_000737885.1	2	0	0	0	0	0	0	1	0	0	0	2	0	16	0	0	0	0	0	0	0	0	4	0	0	2	1	0	0	5	1	1	2	0	0	3	0	3	7	0	2	1	0	0	0	0
B. adolescentis		AD2-8	GCA_002108045.1	1	0	0	0	0	0	0	1	1	0	0	2	0	17	0	0	0	0	0	0	0	0	3	0	0	2	0	0	1	6	1	2	1	0	0	2	1	4	8	0	4	1	0	0	0	0
B. adolescentis		AL46-2	GCA_002108075.1	0	0	0	0	0	0	0	1	0	0	0	1	0	18	0	0	0	0	0	0	0	0	3	0	0	1	0	1	0	5	1	2	1	0	0	3	1	4	7	0	1	1	0	0	0	0
B. adolescentis		AL46-7	GCA_002108095.1	1	0	0	0	0	0	0	1	0	0	0	1	0	15	0	0	0	0	0	0	0	0	4	0	0	2	1	0	0	7	1	1	2	0	0	2	0	4	7	0	1	1	0	0	0	0
B. adolescentis		LMG 10733	GCA_002108135.1	2	0	0	0	0	0	0	1	0	0	0	1	0	13	0	0	0	0	0	0	0	0	3	0	0	1	1	1	0	6	1	1	2	0	1	2	1	4	6	0	2	2	0	0	0	0
B. adolescentis		LMG 11579	GCA_002108155.1	1	0	0	0	0	0	0	1	0	0	0	1	0	16	0	0	0	0	0	0	0	0	2	0	0	1	0	0	0	5	0	2	1	0	0	2	0	2	7	0	1	1	0	0	0	0
B. adolescentis		LMG 18897	GCA_002108165.1	1	0	0	0	0	0	0	1	0	0	0	1	0	17	0	0	0	0	0	0	0	0	2	0	1	1	0	0	0	6	1	2	1	0	0	2	1	3	7	0	3	1	0	0	0	0
B. adolescentis		S1-11	GCA_003030905.1	1	0	0	0	0	0	0	1	0	0	0	1	0	13	0	0	0	0	0	0	0	0	3	0	1	1	0	0	0	5	0	1	2	0	0	2	0	3	8	0	1	1	0	0	0	0
B. adolescentis		S6	GCA_003429385.1	1	0	0	0	0	0	0	1	0	0	0	1	0	16	0	0	0	0	0	0	0	0	3	0	0	1	0	0	0	4	1	2	2	0	0	2	1	2	7	0	1	1	0	0	0	0
B. adolescentis		TM06-4	GCA_003436185.1	0	0	0	0	0	0	0	1	1	0	0	2	0	16	0	0	0	0	0	0	0	0	3	0	0	1	0	0	0	5	1	0	2	0	0	2	0	2	9	0	2	1	0	0	0	0
B. adolescentis		TF06-2AC	GCA_003437735.1	0	0	0	0	0	0	0	1	0	0	0	1	0	16	0	0	0	0	0	0	0	0	3	0	0	1	0	0	0	5	0	1	2	0	0	2	1	3	9	0	2	2	0	0	0	0
B. adolescentis		TF06-29	GCA_003437755.1	0	0	0	0	0	0	0	1	0	0	0	1	0	16	0	0	0	0	0	0	0	0	3	0	0	1	0	0	0	5	0	1	2	0	0	2	1	3	9	0	2	2	0	0	0	0
B. adolescentis		TF06-10AC	GCA_003437775.1	0	0	0	0	0	0	0	1	0	0	0	1	0	16	0	0	0	0	0	0	0	0	3	0	0	1	0	0	0	5	0	1	2	0	0	2	1	3	9	0	2	2	0	0	0	0
B. adolescentis		AF28-4AC	GCA_003457765.1	0	0	0	0	0	0	0	1	1	0	0	2	0	17	0	0	0	0	0	0	0	0	2	0	0	2	0	0	0	5	1	1	2	0	0	2	0	2	9	0	2	1	0	0	0	0
B. adolescentis		AF21-27	GCA_003458805.1	0	0	0	0	0	0	0	1	0	0	0	1	0	16	0	0	0	0	0	0	0	0	3	0	0	1	0	0	0	5	1	1	2	0	0	3	0	2	7	0	1	1	0	0	0	0
B. adolescentis		OF04-5	GCA_003462885.1	0	0	0	0	0	0	0	1	1	0	0	2	0	17	0	0	0	0	0	0	0	0	2	0	0	2	0	0	0	5	1	1	2	0	0	2	0	2	9	0	2	1	0	0	0	0
B. adolescentis		OF04-9AC	GCA_003462895.1	0	0	0	0	0	0	0	1	1	0	0	2	0	17	0	0	0	0	0	0	0	0	2	0	0	2	0	0	0	5	1	1	2	0	0	2	0	2	9	0	2	1	0	0	0	0
B. adolescentis		AF15-3	GCA_003464325.1	0	0	0	0	0	0	1	1	1	0	1	2	0	16	0	0	0	0	0	0	0	0	2	0	1	2	0	0	0	5	1	3	2	0	0	2	3	2	9	0	3	1	0	0	0	0
B. adolescentis		AF14-56	GCA_003465205.1	0	0	0	0	0	0	0	1	0	0	0	1	0	17	0	0	0	0	0	0	0	0	2	0	0	3	0	0	0	5	1	1	2	0	0	3	0	2	7	0	1	1	0	0	0	0
B. adolescentis		TM06-51	GCA_003466335.1	0	0	0	0	0	0	0	1	1	0	0	2	0	17	0	0	0	0	0	0	0	0	3	0	0	2	0	0	0	5	1	0	2	0	0	2	1	2	11	0	2	1	0	0	0	0
B. adolescentis		AM41-17	GCA_003467335.1	1	0	0	0	0	0	0	1	1	0	0	2	0	16	0	0	0	0	0	0	0	0	2	0	0	1	1	0	0	5	1	1	2	0	0	2	0	2	8	0	1	1	0	0	0	0
B. adolescentis		AM36-3AC	GCA_003468385.1	0	0	0	0	0	0	0	1	1	0	0	2	0	16	0	0	0	0	0	0	0	0	2	0	1	1	0	0	0	5	1	2	2	0	0	2	1	2	9	0	1	1	0	0	0	0
B. adolescentis		AM34-11	GCA_003469145.1	0	0	0	0	0	0	0	1	1	0	0	2	0	17	0	0	0	0	0	0	0	0	2	0	0	1	0	0	0	5	1	1	3	0	0	2	1	2	9	0	2	1	0	0	0	0
B. adolescentis		AM14-37	GCA_003472095.1	2	0	0	0	0	0	0	1	1	0	0	2	0	17	0	0	0	0	0	0	0	0	3	0	0	3	1	0	0	5	1	1	2	0	0	2	0	2	8	0	1	1	0	0	0	0
B. adolescentis		AF45-19	GCA_003473345.1	0	0	0	0	0	0	0	0	0	0	0	0	0	7	0	0	0	0	0	0	0	0	2	0	0	3	0	0	0	2	0	1	0	0	0	0	0	4	4	0	0	1	0	0	0	0
B. adolescentis		P2P3	GCA_003856735.1	1	0	0	0	0	0	0	1	0	0	0	1	0	17	0	0	0	0	0	0	0	0	4	0	0	1	1	0	0	5	1	1	1	0	0	2	0	2	7	0	1	1	0	0	0	0
B. adolescentis		ca_0067	GCA_004167585.1	1	0	0	0	0	0	0	1	0	0	0	1	0	17	0	0	0	0	0	0	0	0	3	0	0	2	0	0	0	5	0	1	2	0	1	2	0	2	7	0	1	1	0	0	0	0
B. adolescentis		BIOML-A227	GCA_009075795.1	1	0	0	0	0	0	0	1	0	0	0	1	0	16	0	0	0	0	0	0	0	0	3	0	0	2	0	0	0	3	1	1	1	0	1	2	1	3	8	0	2	1	0	0	0	0
B. adolescentis		BIOML-A188	GCA_009075895.1	1	0	0	0	0	0	0	1	0	0	0	1	0	17	0	0	0	0	0	0	0	0	3	0	0	2	0	0	0	5	1	1	1	0	1	2	0	3	7	0	1	1	0	0	0	0
B. adolescentis		BIOML-A8	GCA_009095375.1	2	0	0	0	0	0	0	1	0	0	0	2	0	17	0	0	0	0	0	0	0	0	3	0	0	1	1	0	0	5	1	2	1	0	0	3	0	3	8	0	2	2	0	0	0	0
B. adolescentis		ZJ2	GCA_009832825.1	0	0	0	0	0	0	0	1	1	0	0	2	0	17	0	0	0	0	0	0	0	0	2	0	0	1	0	0	0	5	1	1	2	0	0	2	0	2	10	0	2	1	0	0	0	0
B. pseudocatenulatum	Human	IPLA36007	GCA_000708005.1	1	0	0	0	0	0	0	1	1	0	1	1	0	13	0	0	0	0	0	0	0	0	4	1	0	0	0	0	0	5	1	2	1	0	1	3	0	3	12	0	1	2	0	0	0	0
B. pseudocatenulatum	Human	2789STDY5834840	GCA_001405035.1	1	0	0	0	0	0	0	2	1	0	1	1	0	14	0	0	1	0	0	0	0	0	4	1	0	2	0	1	0	4	1	2	1	0	0	3	0	3	10	0	2	2	0	0	0	0
B. pseudocatenulatum	Human	S121.5	GCA_001576885.1	0	0	0	0	0	0	0	2	1	0	1	1	0	4	0	0	1	0	0	0	0	0	0	0	0	1	0	0	0	2	1	0	1	0	0	1	0	2	10	0	1	2	0	0	0	0
B. pseudocatenulatum	Human	1E	GCA_002271255.1	2	0	0	0	0	0	0	2	1	0	1	1	0	15	0	0	1	0	0	0	0	0	4	1	1	1	0	0	0	5	0	2	1	0	0	2	0	3	14	0	3	1	0	0	0	0
B. pseudocatenulatum	Human	TM10-1	GCA_003436025.1	0	0	0	0	0	0	0	1	1	0	1	1	0	14	0	0	1	0	0	0	0	0	4	1	0	0	0	0	0	5	0	2	3	0	0	3	0	3	14	0	2	2	0	0	0	0
B. pseudocatenulatum	Human	TM08-2	GCA_003436105.1	0	1	0	0	0	0	0	1	0	0	1	0	0	10	0	0	1	0	0	0	0	0	2	0	0	1	0	0	0	3	1	1	2	0	0	2	0	0	7	0	2	2	0	0	0	0
B. pseudocatenulatum	Human	TM07-3AT	GCA_003436315.1	0	0	0	0	0	0	0	2	1	0	1	1	0	14	0	0	1	0	0	0	0	0	3	1	0	1	0	0	0	5	1	2	1	0	0	2	0	3	14	0	2	2	0	0	0	0
B. pseudocatenulatum	Human	TF08-3AT	GCA_003436955.1	1	0	0	0	0	0	0	1	1	0	1	1	0	15	0	0	1	0	0	0	0	0	3	1	0	2	0	0	0	5	1	2	1	0	0	3	0	3	13	0	2	2	0	0	0	0
B. pseudocatenulatum	Human	TF07-45	GCA_003437075.1	0	1	0	0	0	0	0	1	1	0	1	1	0	15	0	0	1	0	0	0	0	0	3	1	0	2	0	0	0	5	0	2	1	0	0	2	0	2	9	0	1	2	0	0	0	0
B. pseudocatenulatum	Human	TF07-23	GCA_003437155.1	0	1	0	0	0	0	0	1	1	0	1	1	0	14	0	0	1	0	0	0	0	0	3	1	1	1	0	0	0	5	0	2	1	0	0	3	0	2	9	0	2	2	0	0	0	0
B. pseudocatenulatum	Human	TM05-11	GCA_003437435.1	0	0	0	0	0	0	0	1	1	0	1	1	0	14	0	0	1	0	0	0	0	0	3	0	0	3	0	0	0	5	0	2	1	0	0	2	0	3	14	0	2	2	0	0	0	0
B. pseudocatenulatum	Human	TF05-2AC	GCA_003437825.1	0	1	0	0	0	0	0	1	1	0	1	1	0	13	0	0	1	0	0	0	0	0	3	1	1	1	0	0	0	5	1	1	3	0	0	2	0	3	10	0	2	2	0	0	0	0
B. pseudocatenulatum	Human	TF05-19AC	GCA_003437835.1	0	1	0	0	0	0	0	1	1	0	1	2	0	10	0	0	1	0	0	0	0	0	4	1	0	2	0	0	0	5	0	1	4	0	0	4	0	3	9	0	2	2	0	0	0	0
B. pseudocatenulatum	Human	OM10-8	GCA_003438015.1	0	1	0	0	0	0	0	0	0	0	1	0	0	8	0	0	1	0	0	0	0	0	5	0	0	0	0	0	0	3	0	2	1	0	0	2	0	2	9	0	2	1	0	0	0	0
B. pseudocatenulatum	Human	OM05-2	GCA_003438405.1	0	1	0	0	0	0	0	1	1	0	1	1	0	16	0	0	1	0	0	0	0	0	3	1	0	2	0	0	0	5	0	3	3	0	0	2	0	3	10	0	2	2	0	0	0	0
B. pseudocatenulatum	Human	OF05-12	GCA_003439655.1	0	1	0	0	0	0	0	1	1	0	1	1	0	13	0	0	1	0	0	0	0	0	3	1	0	2	0	0	0	5	1	2	3	0	0	2	0	3	10	0	2	2	0	0	0	0
B. pseudocatenulatum	Human	AF26-1	GCA_003458965.1	0	0	0	0	0	0	0	1	1	0	1	1	0	13	0	0	1	0	0	0	0	0	3	1	0	2	0	0	0	5	0	1	3	0	0	2	0	3	10	0	2	2	0	0	0	0
B. pseudocatenulatum	Human	AF20-20AC	GCA_003459475.1	0	0	0	0	0	0	0	2	1	0	1	1	0	12	0	0	1	0	0	0	0	0	3	1	0	1	0	0	0	5	1	2	1	0	0	2	0	3	11	0	2	3	0	0	0	0
B. pseudocatenulatum	Human	AF18-2AC	GCA_003459865.1	0	1	0	0	0	0	0	1	0	0	1	0	0	7	0	0	1	0	0	0	0	0	2	0	0	2	0	0	0	4	0	2	2	0	0	2	0	1	5	0	1	2	0	0	0	0
B. pseudocatenulatum	Human	AF17-20AC	GCA_003460425.1	0	0	0	0	0	0	0	2	1	0	1	1	0	15	0	0	1	0	0	0	0	0	4	1	0	1	0	0	0	5	1	2	1	0	0	2	1	3	10	0	3	3	0	0	0	0
B. pseudocatenulatum	Human	OF01-21AC	GCA_003463265.1	0	0	0	0	0	0	0	1	0	0	0	0	0	9	0	0	1	0	0	0	0	0	2	0	0	1	0	0	0	5	1	2	1	0	0	1	0	2	7	0	2	3	0	0	0	0
B. pseudocatenulatum	Human	OF01-8	GCA_003463425.1	0	0	0	0	0	0	0	2	1	0	1	1	0	12	0	0	1	0	0	0	0	0	3	1	0	2	0	0	0	5	1	2	1	0	0	2	0	3	11	0	2	3	0	0	0	0
B. pseudocatenulatum	Human	OF01-2	GCA_003463455.1	0	0	0	0	0	0	0	2	1	0	1	1	0	12	0	0	1	0	0	0	0	0	3	1	0	1	0	0	0	5	1	2	1	0	0	2	0	3	11	0	2	3	0	0	0	0
B. pseudocatenulatum	Human	OF01-12	GCA_003463505.1	0	0	0	0	0	0	0	2	1	0	1	1	0	12	0	0	1	0	0	0	0	0	3	1	0	2	0	0	0	5	1	2	1	0	0	2	0	3	11	0	2	3	0	0	0	0
B. pseudocatenulatum	Human	CF01-1	GCA_003463615.1	0	0	0	0	0	0	0	0	0	0	1	0	0	5	0	0	1	0	0	0	0	0	5	0	0	2	0	0	0	2	0	1	3	0	0	2	0	1	10	0	2	2	0	0	0	0
B. pseudocatenulatum	Human	AF12-8LB-d	GCA_003464925.1	0	0	0	0	0	0	0	2	1	0	1	1	0	10	0	0	1	0	0	0	0	0	4	1	0	1	0	0	0	5	1	2	2	0	0	2	0	3	11	0	2	2	0	0	0	0
B. pseudocatenulatum	Human	AF12-10-6.0	GCA_003465065.1	0	0	0	0	0	0	0	2	1	0	1	1	0	10	0	0	1	0	0	0	0	0	4	1	0	1	0	0	0	5	1	2	2	0	0	2	0	3	11	0	2	2	0	0	0	0
B. pseudocatenulatum	Human	AF11-18	GCA_003465135.1	1	0	0	0	0	0	0	2	1	0	1	1	0	14	0	0	1	0	0	0	0	0	4	1	0	1	0	0	0	5	1	2	3	0	0	4	0	3	10	0	2	2	0	0	0	0
B. pseudocatenulatum	Human	AF12-8A-LB	GCA_003465385.1	0	0	0	0	0	0	0	2	1	0	1	1	0	10	0	0	1	0	0	0	0	0	4	1	0	1	0	0	0	5	1	2	2	0	0	2	0	3	11	0	2	2	0	0	0	0
B. pseudocatenulatum	Human	AF03-28	GCA_003465775.1	0	0	0	0	0	0	0	1	1	0	1	1	0	14	0	0	1	0	0	0	0	0	3	1	1	1	0	0	0	5	0	3	1	0	0	2	0	3	14	0	2	2	0	0	0	0
B. pseudocatenulatum	Human	AF02-36-1	GCA_003466105.1	0	1	0	0	0	0	0	1	1	0	1	1	0	13	0	0	1	0	0	0	0	0	3	1	0	1	0	0	0	5	0	3	3	0	0	2	0	3	10	0	2	2	0	0	0	0
B. pseudocatenulatum	Human	AM43-10	GCA_003467065.1	0	1	0	0	0	0	0	1	1	0	1	1	0	12	0	0	1	0	0	0	0	0	3	1	1	1	0	0	0	5	0	2	3	0	0	2	0	3	10	0	2	2	0	0	0	0
B. pseudocatenulatum	Human	AM11-10	GCA_003472415.1	0	0	0	0	0	0	0	2	1	0	1	1	0	13	0	0	1	0	0	0	0	0	3	1	0	1	0	0	0	5	0	2	3	0	0	2	0	3	10	0	3	2	0	0	0	0
B. pseudocatenulatum	Human	AF45-10BH	GCA_003474015.1	0	1	0	0	0	0	0	1	1	0	1	0	0	8	0	0	1	0	0	0	0	0	4	1	0	1	0	0	0	2	1	0	0	0	0	2	0	3	7	0	2	3	0	0	0	0
B. pseudocatenulatum	Human	AF41-3MH	GCA_003474525.1	0	1	0	0	0	0	0	0	0	0	1	1	0	5	0	0	1	0	0	0	0	0	4	0	0	0	0	0	0	2	1	2	2	0	0	3	0	0	5	0	1	2	0	0	0	0
B. pseudocatenulatum	Human	AF36-12AT	GCA_003474835.1	0	0	0	0	0	0	0	2	1	0	1	1	0	13	0	0	1	0	0	0	0	0	3	1	0	3	0	0	0	5	1	2	1	0	0	2	0	3	10	0	2	2	0	0	0	0
B. pseudocatenulatum	Human	S12	GCA_003952825.1	1	0	0	0	0	0	0	1	1	0	1	2	0	11	0	0	1	0	0	0	0	0	4	1	0	0	0	0	0	5	1	1	2	0	0	4	0	3	9	0	2	3	0	0	0	0
B. pseudocatenulatum	Human	ca_0067	GCA_004167565.1	0	0	0	0	0	0	0	1	1	0	1	1	0	11	0	0	0	0	0	0	0	0	3	1	0	1	0	0	0	5	0	1	1	0	0	2	0	3	9	0	2	2	0	0	0	0
B. pseudocatenulatum	Human	NBRC 113353	GCA_006828885.1	0	0	0	0	0	0	0	1	1	0	1	1	0	15	0	0	1	0	0	0	0	0	3	1	1	1	0	0	0	5	0	2	3	0	0	3	0	3	10	0	3	2	0	0	0	0
B. pseudocatenulatum	Human	BIOML-A193	GCA_009876975.1	2	0	0	0	0	0	0	1	1	0	0	1	0	12	0	0	1	0	0	0	0	0	3	1	0	1	0	0	0	5	0	3	1	0	0	2	0	3	13	0	2	2	0	0	0	0
B. pseudocatenulatum	Human	BIOML-A104	GCA_009882125.1	1	0	0	0	0	0	0	2	1	0	1	1	0	15	0	0	0	0	0	0	0	0	3	1	0	1	0	0	0	5	1	2	1	0	0	2	0	3	14	0	1	3	0	0	0	0
B. pseudocatenulatum	Human	BIOML-A1	GCA_009883385.1	0	0	0	0	0	0	0	1	1	0	1	1	0	14	0	0	0	0	0	0	0	0	3	1	0	1	0	0	0	5	1	2	1	0	0	3	0	3	10	0	2	2	0	0	0	0
B. pseudocatenulatum	Human	Bif4	GCA_011008535.1	0	0	0	0	0	0	0	2	1	0	1	1	0	11	0	0	1	0	0	0	0	0	3	1	1	1	0	0	0	5	0	2	1	0	0	2	0	3	10	0	3	1	0	0	0	0
B. pseudocatenulatum	Infant	LMG 10505	GCA_000741685.1	0	0	0	0	0	0	0	2	1	0	0	1	0	16	0	0	1	0	0	0	0	0	4	1	1	1	0	0	0	5	1	2	1	0	0	2	0	3	15	0	2	3	0	0	0	0
B. pseudocatenulatum	Human Milk	1896B	GCA_002075945.1	0	0	0	0	0	0	0	1	1	0	1	2	0	17	0	0	1	0	0	0	0	0	4	1	0	1	0	1	0	5	1	1	1	0	0	4	0	3	13	0	2	3	0	0	0	0
B. pseudocatenulatum		DSM 20438	GCA_000173435.1	0	0	0	0	0	0	0	2	1	0	0	1	0	16	0	0	1	0	0	0	0	0	4	1	1	2	0	0	0	5	1	2	1	0	0	2	0	3	15	0	2	3	0	0	0	0
B. pseudocatenulatum		JCM 1200	GCA_001025215.1	0	0	0	0	0	0	0	2	1	0	0	1	0	17	0	0	1	0	0	0	0	0	4	1	1	1	0	0	0	5	1	2	1	0	0	3	0	3	15	0	2	3	0	0	0	0
[truncated: 9 more columns]

## Sheet: Major
Genome Name	Host	Strain	Accesssion	GH1	GH101	GH109	GH110	GH112	GH120	GH121	GH123	GH125	GH127	GH129	GH13	GH136	GH140	GH146	GH2	GH20	GH23	GH25	GH26	GH27	GH29	GH3	GH30	GH31	GH32	GH33	GH35	GH36	GH38	GH42	GH43	GH5	GH51	GH53	GH65	GH77	GH78	GH8	GH84	GH85	GH89	GH94	GH95
B. animalis subsp. animalis	Human	RH	GCF_000695895.1	1	0	0	0	0	0	0	0	0	1	0	12	2	0	0	2	0	0	2	0	3	0	0	2	0	1	0	0	0	0	2	3	1	1	0	0	2	0	0	0	0	0	0	0
B. animalis subsp. animalis	Human	A6	GCF_000817045.1	1	0	0	0	0	0	0	0	0	1	0	13	0	0	0	2	0	0	2	0	3	0	0	2	0	1	0	0	2	0	2	3	1	1	0	0	2	0	0	0	0	0	0	0
B. animalis subsp. animalis	Human	TF04-14	GCF_003438565.1	1	0	0	0	0	0	0	0	0	1	0	12	0	0	0	2	0	0	2	0	3	0	0	2	0	1	0	0	2	0	2	3	1	1	0	0	2	0	0	0	0	0	0	0
B. animalis subsp. animalis	Human	OM05-7AA	GCF_003438945.1	1	0	0	0	0	0	0	0	0	1	0	12	0	0	0	2	0	0	2	0	3	0	0	2	0	1	0	0	2	0	2	3	1	1	0	0	2	0	0	0	0	0	0	0
B. animalis subsp. animalis	Human	S1	GCF_004135895.1	1	0	0	0	0	0	0	0	0	1	0	12	0	0	0	2	0	0	2	0	3	0	0	2	0	1	0	0	2	0	2	3	1	1	0	0	2	0	0	0	0	0	0	0
B. animalis subsp. animalis	Human	co_0103	GCF_004167905.1	1	0	0	0	0	0	0	0	0	1	0	12	0	0	0	2	0	0	2	0	3	0	0	2	0	1	0	0	2	0	2	3	1	1	0	0	2	0	0	0	0	0	0	0
B. animalis subsp. animalis	Human	BSD2780061688st1_E5	GCF_005844245.1	1	0	0	0	0	0	0	0	0	1	0	12	0	0	0	2	0	0	2	0	3	0	0	2	0	1	0	0	2	0	2	3	1	1	0	0	2	0	0	0	0	0	0	0
B. animalis subsp. animalis	Human	J063	GCF_006538245.1	1	0	0	0	0	0	0	0	0	1	0	12	0	0	0	2	0	0	2	0	3	0	0	2	0	1	0	0	2	0	2	3	1	1	0	0	2	0	0	0	0	0	0	0
B. animalis subsp. animalis	Human	J218	GCF_006538265.1	1	0	0	0	0	0	0	0	0	1	0	12	0	0	0	2	0	0	2	0	3	0	0	2	0	1	0	0	2	0	2	3	1	1	0	0	2	0	0	0	0	0	0	0
B. animalis subsp. animalis	Human	J231	GCF_006538285.1	1	0	0	0	0	0	0	0	0	1	0	12	0	0	0	2	0	0	2	0	3	0	0	2	0	1	0	0	2	0	2	3	1	1	0	0	2	0	0	0	0	0	0	0
B. animalis subsp. animalis	Human	B06	GCF_008041995.1	1	0	0	0	0	0	0	0	0	1	0	13	0	0	0	2	0	0	2	0	3	0	0	2	0	1	0	0	2	0	2	3	1	1	0	0	2	0	0	0	0	0	0	0
B. animalis subsp. animalis	Human	BIOML-A2	GCF_009075805.1	1	0	0	0	0	0	0	0	0	1	0	12	0	0	0	2	0	0	2	0	3	0	0	2	0	1	0	0	2	0	2	3	1	1	0	0	2	0	0	0	0	0	0	0
B. animalis subsp. animalis	Human	BIOML-A3	GCF_009075825.1	1	0	0	0	0	0	0	0	0	1	0	12	0	0	0	2	0	0	2	0	3	0	0	2	0	1	0	0	2	0	2	3	1	1	0	0	2	0	0	0	0	0	0	0
B. animalis subsp. animalis	Human	BIOML-A1	GCF_009077835.1	1	0	0	0	0	0	0	0	0	1	0	12	0	0	0	2	0	0	2	0	3	0	0	2	0	1	0	0	2	0	2	3	1	1	0	0	2	0	0	0	0	0	0	0
B. animalis subsp. animalis	Human	MGYG-HGUT-02459	GCF_902387355.1	1	0	0	0	0	0	0	0	0	1	0	13	0	0	0	2	0	0	2	0	3	0	0	2	0	1	0	0	2	0	2	3	1	1	0	0	2	0	0	0	0	0	0	0
B. animalis subsp. animalis	Human	CNCM I-4602	GCF_003671995.1	1	0	0	0	0	0	0	0	0	0	0	11	0	0	0	2	0	0	1	0	2	0	0	1	0	1	0	0	2	0	0	3	1	1	0	0	2	0	0	0	0	0	0	0
B. animalis subsp. animalis	Human	IM386	GCF_001039715.1	1	0	0	0	0	0	0	0	0	0	0	11	0	0	0	2	0	0	1	0	2	0	0	1	0	1	0	0	2	0	0	3	1	1	0	0	2	0	0	0	0	0	0	0
B. animalis subsp. animalis	Blood	Bifido_08	GCF_900157045.1	1	0	0	0	0	0	0	0	0	1	0	12	0	0	0	2	0	0	2	0	3	0	0	2	0	1	0	0	2	0	2	3	1	1	0	0	2	0	0	0	0	0	0	0
B. animalis subsp. animalis	Blood	Bifido_11	GCF_900157135.1	1	0	0	0	0	0	0	0	0	1	0	12	0	0	0	2	0	0	2	0	3	0	0	2	0	1	0	0	2	0	2	3	1	1	0	0	2	0	0	0	0	0	0	0
B. animalis subsp. animalis	Commercial dietary supplements	BL3	GCF_002220485.1	1	0	0	0	0	0	0	0	0	1	0	13	0	0	0	2	0	0	2	0	3	0	0	2	0	1	0	0	2	0	2	3	1	1	0	0	2	0	0	0	0	0	0	0
B. animalis subsp. animalis	Commercial dietary supplements	DS15_2	GCF_003094875.1	1	0	0	0	0	0	0	0	0	1	0	12	0	0	0	2	0	0	2	0	3	0	0	2	0	1	0	0	2	0	2	3	1	1	0	0	2	0	0	0	0	0	0	0
B. animalis subsp. animalis	Commercial dietary supplements	DS11_2	GCF_003094895.1	1	0	0	0	0	0	0	0	0	1	0	12	0	0	0	2	0	0	2	0	3	0	0	2	0	1	0	0	2	0	2	3	1	1	0	0	2	0	0	0	0	0	0	0
B. animalis subsp. animalis	Commercial dietary supplements	DS20_2	GCF_003095055.1	1	0	0	0	0	0	0	0	0	1	0	12	0	0	0	2	0	0	2	0	3	0	0	2	0	1	0	0	2	0	2	3	1	1	0	0	2	0	0	0	0	0	0	0
B. animalis subsp. animalis	Commercial dietary supplements	DS2_2	GCF_003095075.1	1	0	0	0	0	0	0	0	0	1	0	12	0	0	0	2	0	0	2	0	3	0	0	2	0	1	0	0	2	0	2	3	1	1	0	0	2	0	0	0	0	0	0	0
B. animalis subsp. animalis	Commercial dietary supplements	DS1_2	GCF_003095115.1	1	0	0	0	0	0	0	0	0	1	0	12	0	0	0	2	0	0	2	0	3	0	0	2	0	1	0	0	2	0	2	3	1	1	0	0	2	0	0	0	0	0	0	0
B. animalis subsp. animalis	Dog	2006B	GCF_004154625.1	1	0	0	0	0	0	0	0	0	1	0	12	0	0	0	3	0	0	1	1	3	0	0	2	1	1	0	0	3	0	3	3	2	1	0	0	2	0	0	0	0	0	0	0
B. animalis subsp. animalis	Pig	MCC 1489	GCF_001263835.1	1	0	0	0	0	0	0	0	0	0	0	9	0	0	0	2	0	0	1	0	1	0	0	1	0	1	0	0	2	0	0	3	1	1	0	0	2	0	0	0	0	0	0	0
B. animalis subsp. animalis	Rodent	LMG 10508	GCF_000741485.1	1	0	0	0	0	0	0	0	0	0	0	10	0	0	0	2	0	0	1	0	2	0	0	1	0	1	0	0	2	0	0	3	1	1	0	0	2	0	0	0	0	0	0	0
B. animalis subsp. animalis	Rodent	YL2_1	GCF_001688645.2	1	0	0	0	0	0	0	0	0	1	0	10	0	0	0	2	0	1	2	0	2	0	0	1	0	1	0	0	2	0	2	3	1	1	0	0	2	0	0	0	0	0	0	0
B. animalis subsp. animalis	Rodent	YL2_2	GCF_002221565.2	1	0	0	0	0	0	0	0	0	1	0	11	0	0	0	2	0	1	2	0	2	0	0	1	0	1	0	0	2	0	2	3	1	1	0	0	2	0	0	0	0	0	0	0
B. animalis subsp. animalis	Rodent	ATCC 27672	GCF_001264055.1	1	0	0	0	1	0	0	0	0	0	0	9	1	0	0	3	0	0	2	1	1	0	0	1	0	1	0	0	3	0	2	4	1	1	0	0	2	0	0	0	0	0	0	0
B. animalis subsp. animalis	Rodent	MCC 0483	GCF_001263945.1	1	0	0	0	1	0	0	0	0	0	0	9	1	0	0	2	0	0	2	1	0	0	0	1	0	1	0	0	2	0	2	3	1	1	0	0	2	0	0	0	0	0	0	0
B. animalis subsp. animalis	Rodent	MCC 0499	GCF_001263865.1	1	0	0	0	1	0	0	0	0	0	0	9	1	0	0	2	0	0	4	0	1	0	0	1	0	1	0	0	2	0	0	2	1	1	0	0	2	0	0	0	0	0	0	0
B. animalis subsp. animalis		Probio-M8	GCF_011770105.1	1	0	0	0	0	0	0	0	0	1	0	13	0	0	0	2	0	0	2	0	3	0	0	2	0	1	0	0	2	0	2	3	1	1	0	0	2	0	0	0	0	0	0	0
B. animalis subsp. animalis		ATCC 25527	GCF_000260715.1	1	0	0	0	0	0	0	0	0	0	0	11	0	0	0	2	0	0	1	0	2	0	0	1	0	1	0	0	2	0	0	3	1	1	0	0	2	0	0	0	0	0	0	1
B. animalis subsp. lactis	Human	MN-Gup	GCF_009834975.1	1	0	0	0	0	0	0	0	0	1	0	12	0	0	0	2	0	0	2	0	3	0	0	2	0	1	0	0	2	0	2	3	1	1	0	0	2	0	0	0	0	0	0	0
B. animalis subsp. lactis	Human	KLDS2.0603	GCA_000816205.1	1	0	0	0	0	0	0	0	0	1	0	12	0	0	0	2	0	0	2	0	3	0	0	2	0	1	0	0	2	0	2	3	1	1	0	0	2	0	0	0	0	0	0	0
B. animalis subsp. lactis	Human	646	GCA_001892925.1	1	0	0	0	0	0	0	0	0	1	0	12	0	0	0	2	0	0	2	0	3	0	0	2	0	1	0	0	2	0	2	3	1	1	0	0	2	0	0	0	0	0	0	0
B. animalis subsp. lactis	Human	S7	GCA_003390755.1	1	0	0	0	0	0	0	0	0	1	0	13	0	0	0	2	0	0	2	0	3	0	0	2	0	1	0	0	2	0	2	3	1	1	0	0	2	0	0	0	0	0	0	0
B. animalis subsp. lactis	Infant	BF052	GCA_000818055.1	1	0	0	0	0	0	0	0	0	1	0	12	0	0	0	2	0	0	2	0	3	0	0	2	0	1	0	0	2	0	2	3	1	1	0	0	2	0	0	0	0	0	0	0
B. animalis subsp. lactis	Infant	IDCC4301	GCA_003428375.1	1	0	0	0	0	0	0	0	0	1	0	13	0	0	0	2	0	0	2	0	3	0	0	2	0	1	0	0	2	0	2	3	1	1	0	0	2	0	0	0	0	0	0	0
B. animalis subsp. lactis	Human Milk	BIO5764	GCF_008868455.1	1	0	0	0	0	0	0	0	0	1	0	12	0	0	0	1	0	0	2	0	3	0	0	2	0	1	0	0	2	0	2	3	1	1	0	0	2	0	0	0	0	0	0	0
B. animalis subsp. lactis	Food product - supplement	LMG P-17502_2	GCF_002914895.1	1	0	0	0	0	0	0	0	0	1	0	12	0	0	0	2	0	0	2	0	3	0	0	2	0	1	0	0	2	0	2	3	1	1	0	0	2	0	0	0	0	0	0	0
B. animalis subsp. lactis	Commercial dietary supplements	DS27_2	GCF_003094775.1	1	0	0	0	0	0	0	0	0	1	0	12	0	0	0	2	0	0	2	0	3	0	0	2	0	1	0	0	2	0	2	3	1	1	0	0	2	0	0	0	0	0	0	0
B. animalis subsp. lactis	Commercial dietary supplements	DS24_2	GCF_003094815.1	1	0	0	0	0	0	0	0	0	1	0	12	0	0	0	2	0	0	2	0	3	0	0	2	0	1	0	0	2	0	2	3	1	1	0	0	2	0	0	0	0	0	0	0
B. animalis subsp. lactis	Commercial dietary supplements	DS23_2	GCA_003094835.1	1	0	0	0	0	0	0	0	0	1	0	11	0	0	0	2	0	0	2	0	3	0	0	2	0	1	0	0	2	0	2	3	1	1	0	0	2	0	0	0	0	0	0	0
B. animalis subsp. lactis	Cultured Food	CF3_2	GCA_003094915.1	1	0	0	0	0	0	0	0	0	1	0	12	0	0	0	1	0	0	1	0	3	0	0	2	0	1	0	0	2	0	2	3	1	1	0	0	2	0	0	0	0	0	0	0
B. animalis subsp. lactis	Food product - supplement	LMG P-17502_1	GCA_002914815.1	1	0	0	0	0	0	0	0	0	1	0	12	0	0	0	2	0	0	2	0	3	0	0	2	0	1	0	0	2	0	2	3	1	1	0	0	2	0	0	0	0	0	0	0
B. animalis subsp. lactis	Food product - supplement	LMG P-17502_2	GCA_002914895.1	1	0	0	0	0	0	0	0	0	1	0	13	0	0	0	2	0	0	2	0	3	0	0	2	0	1	0	0	2	0	2	3	1	1	0	0	2	0	0	0	0	0	0	0
B. animalis subsp. lactis	Commercial dietary supplements	DS27_2	GCA_003094775.1	1	0	0	0	0	0	0	0	0	1	0	12	0	0	0	2	0	0	2	0	3	0	0	2	0	1	0	0	2	0	2	3	1	1	0	0	2	0	0	0	0	0	0	0
B. animalis subsp. lactis	Commercial dietary supplements	DS24_2	GCA_003094815.1	1	0	0	0	0	0	0	0	0	1	0	12	0	0	0	2	0	0	2	0	3	0	0	2	0	1	0	0	2	0	2	3	1	1	0	0	2	0	0	0	0	0	0	0
B. animalis subsp. lactis	Commercial dietary supplements	DS28_2	GCA_003095015.1	1	0	0	0	0	0	0	0	0	1	0	12	0	0	0	2	0	0	2	0	3	0	0	2	0	1	0	0	2	0	2	3	1	1	0	0	2	0	0	0	0	0	0	0
B. animalis subsp. lactis	Microbial food product	HN019	GCA_003606305.1	1	0	0	0	0	0	0	0	0	1	0	13	0	0	0	2	0	0	2	0	3	0	0	2	0	1	0	0	2	0	2	3	1	1	0	0	2	0	0	0	0	0	0	0
B. animalis subsp. lactis	Fermented food	UBBLa 70	GCA_003970855.1	1	0	0	0	0	0	0	0	0	1	0	12	0	0	0	2	0	0	2	0	3	0	0	2	0	1	0	0	2	0	2	3	1	1	0	0	2	0	0	0	0	0	0	0
B. animalis subsp. lactis	Dog	2011B	GCA_004154455.1	1	0	0	0	1	0	0	0	0	0	0	11	1	0	0	3	1	0	2	1	3	0	0	1	0	1	0	0	3	2	2	3	3	1	0	0	2	0	0	0	0	0	0	0
B. animalis subsp. lactis	Dog	2007B	GCA_004154645.1	1	0	0	0	1	0	0	0	0	1	0	12	1	0	0	2	1	0	1	0	3	0	0	0	0	1	0	0	2	2	2	3	2	1	0	0	2	0	0	0	0	0	0	0
B. animalis subsp. lactis	Dog	1821B	GCA_004154435.1	1	0	0	0	0	0	0	0	0	1	0	12	0	0	0	2	0	0	2	0	3	0	0	2	0	1	0	0	2	0	2	3	1	1	0	0	2	0	0	0	0	0	0	0
B. animalis subsp. lactis	Pig	1528B	GCA_004154555.1	1	0	0	0	0	0	0	0	0	1	0	12	0	0	0	3	0	0	3	1	2	0	0	1	0	1	0	0	3	0	2	3	2	1	0	0	2	0	0	0	0	0	0	0
B. animalis subsp. lactis	Chimpanzee	1869B	GCA_004154445.1	1	0	0	0	0	0	0	0	0	1	0	12	0	0	0	2	0	0	2	0	3	0	0	2	0	1	0	0	2	0	2	3	1	1	0	0	2	0	0	0	0	0	0	0
B. animalis subsp. lactis	Chimpanzee	1813B	GCA_004154525.1	1	0	0	0	0	0	0	0	0	1	0	12	0	0	0	2	0	0	2	0	3	0	0	2	0	1	0	0	2	0	2	3	1	1	0	0	2	0	0	0	0	0	0	0
B. animalis subsp. lactis	Chimpanzee	1843B	GCA_004154475.1	1	0	0	0	0	0	0	0	0	1	0	12	0	0	0	2	0	0	2	0	3	0	0	2	0	1	0	0	2	0	2	3	1	1	0	0	2	0	0	0	0	0	0	0
B. animalis subsp. lactis	Macaque	1802B	GCA_004154655.1	1	0	0	0	0	0	0	0	0	1	0	12	0	0	0	2	0	0	2	0	3	0	0	2	0	1	0	0	2	0	2	3	1	1	0	0	2	0	0	0	0	0	0	0
B. animalis subsp. lactis	Vervet monkey	1811B	GCA_004154535.1	1	0	0	0	0	0	0	0	0	1	0	12	0	0	0	2	0	0	2	0	3	0	0	2	0	1	0	0	2	0	2	3	1	1	0	0	2	0	0	0	0	0	0	0
B. animalis subsp. lactis	Vervet monkey	1808B	GCA_004154545.1	1	0	0	0	0	0	0	0	0	1	0	12	0	0	0	2	0	0	2	0	3	0	0	2	0	1	0	0	2	0	2	3	1	1	0	0	2	0	0	0	0	0	0	0
B. animalis subsp. lactis	Pheasant	1316B	GCA_004154565.1	1	0	0	0	0	0	0	0	0	1	0	12	0	0	0	2	0	0	2	0	3	0	0	2	0	1	0	0	2	0	2	3	1	1	0	0	2	0	0	0	0	0	0	0
B. animalis subsp. lactis	Rabbit	ATCC 27674	GCA_001263985.1	1	0	0	0	0	0	0	0	0	1	0	12	0	0	0	2	0	0	2	0	3	0	0	2	0	1	0	0	2	0	2	3	1	1	0	0	2	0	0	0	0	0	0	0
B. animalis subsp. lactis	Rabbit	1395B	GCA_004154695.1	1	0	0	0	0	0	0	0	0	1	0	12	0	0	0	2	0	0	2	0	3	0	0	2	0	1	0	0	2	0	2	3	1	1	0	0	2	0	0	0	0	0	0	0
B. animalis subsp. lactis	Chicken	ATCC 27536	GCA_001263975.1	1	0	0	0	0	0	0	0	0	1	0	12	0	0	0	2	0	0	2	0	3	0	0	2	0	1	0	0	2	0	2	3	1	1	0	0	2	0	0	0	0	0	0	0
B. animalis subsp. lactis	Sewage	ATCC 27673	GCA_001264015.1	1	0	0	0	0	0	0	0	0	1	0	12	0	0	0	3	0	0	1	0	2	0	0	1	0	1	0	0	2	0	1	3	2	1	0	0	2	0	0	0	0	0	0	0
B. animalis subsp. lactis		BM 25	GCA_002803775.1	2	0	0	0	0	0	0	0	0	1	0	12	0	0	0	2	0	0	2	0	3	0	0	2	0	1	0	0	3	0	2	3	1	1	0	0	2	0	0	0	0	0	0	0
B. animalis subsp. lactis		2010B	GCA_004154425.1	1	0	0	0	1	0	0	0	0	1	0	12	0	0	0	1	0	0	2	0	1	0	0	4	0	1	0	0	2	2	2	3	2	1	0	0	2	0	0	0	0	0	0	0
B. animalis subsp. lactis		BB-12	GCA_000025245.1	1	0	0	0	0	0	0	0	0	1	0	13	0	0	0	2	0	0	2	0	3	0	0	2	0	1	0	0	2	0	2	3	1	1	0	0	2	0	0	0	0	0	0	0
B. animalis subsp. lactis		ATCC 27673	GCA_000471945.1	1	0	0	0	0	0	0	0	0	1	0	12	0	0	0	3	0	0	1	0	2	0	0	1	0	1	0	0	2	0	1	3	2	1	0	0	2	0	0	0	0	0	0	0
B. animalis subsp. lactis		AD011	GCA_000021425.1	1	0	0	0	0	0	0	0	0	1	0	13	0	0	0	2	0	0	2	0	3	0	0	2	0	1	0	0	2	0	2	3	1	1	0	0	2	0	0	0	0	0	0	0
B. animalis subsp. lactis		Bl-04; ATCC SD5219	GCA_000022705.1	1	0	0	0	0	0	0	0	0	1	0	12	0	0	0	2	0	0	2	0	3	0	0	2	0	1	0	0	2	0	2	3	1	1	0	0	2	0	0	0	0	0	0	0
B. animalis subsp. lactis		DSM 10140	GCA_000022965.1	1	0	0	0	0	0	0	0	0	1	0	12	0	0	0	2	0	0	2	0	3	0	0	2	0	1	0	0	2	0	2	3	1	1	0	0	2	0	0	0	0	0	0	0
B. animalis subsp. lactis		V9	GCA_000092765.1	1	0	0	0	0	0	0	0	0	1	0	13	0	0	0	2	0	0	2	0	3	0	0	2	0	1	0	0	2	0	2	3	1	1	0	0	2	0	0	0	0	0	0	0
B. animalis subsp. lactis		HN019	GCA_000172535.1	1	0	0	0	0	0	0	0	0	1	0	12	0	0	0	2	0	0	2	0	3	0	0	2	0	1	0	0	2	0	2	3	1	1	0	0	2	0	0	0	0	0	0	0
B. animalis subsp. lactis		CNCM I-2494	GCA_000220885.1	1	0	0	0	0	0	0	0	0	1	0	13	0	0	0	2	0	0	2	0	3	0	0	2	0	1	0	0	2	0	2	3	1	1	0	0	2	0	0	0	0	0	0	0
B. animalis subsp. lactis		BLC1	GCA_000224965.2	1	0	0	0	0	0	0	0	0	1	0	12	0	0	0	2	0	0	2	0	3	0	0	2	0	1	0	0	2	0	2	3	1	1	0	0	2	0	0	0	0	0	0	0
B. animalis subsp. lactis		BS 01	GCA_000240765.1	1	0	0	0	0	0	0	0	0	1	0	13	0	0	0	2	0	0	2	0	3	0	0	2	0	1	0	0	2	0	2	3	1	1	0	0	2	0	0	0	0	0	0	0
B. animalis subsp. lactis		B420	GCA_000277325.1	1	0	0	0	0	0	0	0	0	1	0	12	0	0	0	2	0	0	2	0	3	0	0	2	0	1	0	0	2	0	2	3	1	1	0	0	2	0	0	0	0	0	0	0
B. animalis subsp. lactis		Bi-07	GCA_000277345.1	1	0	0	0	0	0	0	0	0	1	0	12	0	0	0	2	0	0	2	0	3	0	0	2	0	1	0	0	2	0	2	3	1	1	0	0	2	0	0	0	0	0	0	0
B. animalis subsp. lactis		Bl12	GCA_000414215.1	1	0	0	0	0	0	0	0	0	1	0	12	0	0	0	2	0	0	2	0	3	0	0	2	0	1	0	0	2	0	2	3	1	1	0	0	2	0	0	0	0	0	0	0
B. animalis subsp. lactis		CECT 8145	GCA_000612705.1	1	0	0	0	0	0	0	0	0	1	0	12	0	0	0	2	0	0	2	0	3	0	0	2	0	1	0	0	2	0	2	3	1	1	0	0	2	0	0	0	0	0	0	0
B. pseudolongum subsp. globosum	Alpaca	1655B	GCA_004156195.1	0	0	1	0	0	0	0	0	0	0	0	17	0	0	0	2	0	0	1	0	0	0	1	1	0	1	0	0	2	0	0	3	0	1	0	0	2	0	0	0	0	0	0	0
B. pseudolongum subsp. globosum	Bear	1744B	GCA_002846675.1	0	0	1	0	0	0	0	0	0	0	0	17	0	0	0	2	0	1	1	0	0	0	1	1	0	1	0	0	2	0	0	3	0	1	0	0	2	0	0	0	0	0	0	0
B. pseudolongum subsp. globosum	Bear	2023B	GCA_004155635.1	2	0	1	0	1	0	0	0	0	0	0	17	1	0	0	3	0	0	1	0	0	1	3	1	2	1	0	0	3	0	1	3	0	1	0	0	2	0	0	0	0	0	1	0
B. pseudolongum subsp. globosum	Bovine	LMG 11569	GCA_000741295.1	0	0	1	0	0	0	0	0	0	0	0	17	0	0	0	2	0	0	1	0	0	0	2	1	0	1	0	0	1	0	0	3	0	0	0	0	2	0	0	0	0	0	0	0
B. pseudolongum subsp. globosum	Calf	2004B	GCA_004155115.1	0	0	1	0	0	0	0	0	0	0	0	16	0	0	0	2	0	0	1	0	0	0	2	1	0	1	0	0	2	0	0	3	0	0	0	0	2	0	0	0	0	0	0	0
B. pseudolongum subsp. globosum	Calf	S102017	GCA_004155405.1	0	0	1	0	0	0	0	0	0	0	0	15	0	0	0	2	0	0	1	0	0	0	2	1	0	1	0	0	1	0	0	3	0	0	0	0	2	0	0	0	0	0	0	0
B. pseudolongum subsp. globosum	Calf	S102015	GCA_004155425.1	0	0	1	0	0	0	0	0	0	0	0	15	0	0	0	2	0	0	1	0	0	0	2	1	0	1	0	0	2	0	0	3	0	0	0	0	2	0	0	0	0	0	0	0
B. pseudolongum subsp. globosum	Goat	S22511	GCA_004155435.1	0	0	1	0	0	0	0	0	0	0	0	17	0	1	0	2	0	0	1	0	0	0	1	1	0	1	0	0	2	0	0	7	0	1	0	0	2	0	0	0	0	0	0	0
B. pseudolongum subsp. globosum	Goat	S22506	GCA_004155325.1	0	0	1	0	0	0	0	0	0	0	0	16	0	0	0	2	0	0	0	0	0	0	2	1	0	1	0	0	1	0	0	3	0	0	0	0	2	0	0	0	0	0	0	0
B. pseudolongum subsp. globosum	Goat	S112206	GCA_004155855.1	0	0	1	0	0	0	0	0	0	0	0	17	0	0	0	2	0	0	1	0	0	0	2	1	0	1	0	0	2	0	0	3	0	0	0	0	2	0	0	0	0	0	0	0
B. pseudolongum subsp. globosum	Goat	1780B	GCA_004168525.1	0	0	1	0	0	0	0	0	0	0	0	16	0	0	0	2	0	0	1	0	0	0	1	1	0	1	0	0	2	0	0	3	0	1	0	0	2	0	0	0	0	0	0	0
B. pseudolongum subsp. globosum	Sheep	DSM 20092	GCA_002706665.1	0	0	0	0	0	0	0	0	0	0	0	17	0	0	0	2	0	0	1	0	0	0	2	1	0	1	0	0	1	0	0	3	0	0	0	0	2	0	0	0	0	0	0	0
B. pseudolongum subsp. globosum	Sheep	2083B	GCA_004155045.1	0	0	1	0	0	0	0	0	0	0	0	17	0	1	0	2	0	0	2	0	0	0	2	1	0	1	0	0	2	0	0	7	0	1	0	0	2	0	0	0	0	0	0	0
B. pseudolongum subsp. globosum	Sheep	2019B	GCA_004155095.1	1	0	1	0	0	0	0	0	0	0	0	15	0	0	0	3	0	0	2	0	0	0	2	1	0	1	0	0	2	0	0	3	0	1	0	0	2	0	0	0	0	0	1	0
B. pseudolongum subsp. globosum	Camel	1616B	GCA_004156145.1	1	0	1	0	0	0	0	0	0	1	0	16	0	0	0	3	0	0	2	0	0	1	2	1	2	1	0	0	2	0	1	3	0	1	0	0	2	0	0	0	0	0	1	0
B. pseudolongum subsp. globosum	llama	1619B	GCA_002846685.1	0	0	1	0	0	0	0	0	0	0	0	17	0	0	0	2	0	1	1	0	0	0	1	1	0	1	0	0	1	0	0	3	0	1	0	0	2	0	0	0	0	0	1	0
B. pseudolongum subsp. globosum	Capybara	2032B	GCA_004155615.1	1	0	1	0	0	0	0	0	0	0	0	17	0	1	0	3	0	0	1	0	0	1	3	1	3	1	0	0	3	0	2	7	0	1	0	0	2	0	0	0	0	0	1	0
B. pseudolongum subsp. globosum	Giraffe	1747B	GCA_002846835.1	1	0	1	0	0	0	0	0	0	1	0	17	0	1	0	3	0	0	3	0	0	1	3	1	2	1	0	0	3	0	2	7	0	1	0	0	2	0	0	0	0	0	1	0
B. pseudolongum subsp. globosum	Wallaby	1734B	GCA_002846845.1	2	0	1	0	1	0	0	0	0	0	0	17	1	1	0	3	0	0	2	0	0	0	2	1	0	1	0	0	3	0	0	7	0	1	0	0	2	0	0	0	0	0	1	0
B. pseudolongum subsp. globosum	Hippopotamus	1691B	GCA_002846875.1	0	0	1	0	0	0	0	0	0	0	0	18	0	0	0	2	0	1	1	0	0	0	1	1	0	1	0	0	2	0	0	3	0	1	0	0	2	0	0	0	0	0	0	0
B. pseudolongum subsp. globosum	Hippopotamus	1678B	GCA_004155155.1	0	0	1	0	0	0	0	0	0	0	0	17	0	0	0	2	0	0	1	0	0	0	1	1	0	1	0	0	2	0	0	3	0	1	0	0	2	0	0	0	0	0	0	0
B. pseudolongum subsp. globosum	Hippopotamus	2029B	GCA_004155165.1	1	0	1	0	0	0	0	0	0	0	0	17	0	1	0	3	0	0	1	0	0	1	3	1	3	1	0	0	3	0	2	7	0	1	0	0	2	0	0	0	0	0	1	0
B. pseudolongum subsp. globosum	Hippopotamus	2088B	GCA_004156075.1	1	0	1	0	0	0	0	0	0	0	0	16	0	0	0	3	0	0	2	0	0	0	2	1	1	1	0	0	3	0	1	4	0	1	0	0	2	0	0	0	0	0	1	0
B. pseudolongum subsp. globosum	Hippopotamus	2086B	GCA_004156135.1	1	0	1	0	0	0	0	0	0	0	0	16	0	0	0	3	0	0	2	0	0	0	2	1	1	1	0	0	3	0	1	4	0	1	0	0	2	0	0	0	0	0	1	0
B. pseudolongum subsp. globosum	Hippopotamus	2072B	GCA_004155565.1	2	0	1	0	1	0	0	0	0	0	0	17	1	1	0	3	0	0	3	0	0	1	3	1	2	1	0	0	3	0	2	7	0	1	0	0	2	0	0	0	0	0	1	0
B. pseudolongum subsp. globosum	Kangaroo	2009B	GCA_004155625.1	1	0	1	0	0	0	0	0	0	2	0	14	0	1	0	3	0	0	1	0	1	0	2	3	1	1	0	0	3	0	1	13	0	2	0	0	2	0	0	0	0	0	1	0
B. pseudolongum subsp. globosum	Kangaroo	2109B	GCA_004155475.1	1	0	1	0	0	0	0	0	0	0	0	15	0	0	0	3	0	0	0	0	0	1	3	1	3	1	0	0	3	0	1	3	0	1	0	0	2	0	0	0	0	0	1	0
B. pseudolongum subsp. globosum	Dolichotis	2089B	GCA_004155525.1	1	0	1	0	0	0	0	0	0	0	0	17	0	0	0	3	0	0	1	0	0	1	3	1	1	1	0	0	3	0	1	3	0	1	0	0	2	0	0	0	0	0	1	0
B. pseudolongum subsp. globosum	Horse	1577B	GCA_004156215.1	2	0	1	0	0	0	0	0	0	0	0	15	0	0	0	3	0	0	1	0	0	0	2	1	1	1	0	0	3	0	1	3	0	1	0	0	2	0	0	0	0	0	1	0
B. pseudolongum subsp. globosum	Hare	1805B	GCA_004155375.1	1	0	1	0	0	0	0	0	0	0	0	17	0	1	0	3	0	0	2	0	0	1	3	1	2	1	0	0	3	0	2	7	0	1	0	0	2	0	0	0	0	0	1	0
B. pseudolongum subsp. globosum	Chicken	1549B	GCA_002846715.1	1	0	1	0	0	0	0	0	0	0	0	17	0	0	0	3	0	0	0	0	0	0	2	1	1	1	0	0	3	0	0	3	0	1	0	0	2	0	0	0	0	0	1	0
B. pseudolongum subsp. globosum	Chicken	1511B	GCA_004155235.1	1	0	1	0	0	0	0	0	0	0	0	17	0	0	0	3	0	0	1	0	0	0	2	1	1	1	0	0	3	0	0	3	0	1	0	0	2	0	0	0	0	0	1	0
B. pseudolongum subsp. globosum	Chicken	1546B	GCA_004155845.1	1	0	1	0	0	0	0	0	0	0	0	17	0	0	0	3	0	0	0	0	0	0	2	1	1	1	0	0	3	0	0	3	0	1	0	0	2	0	0	0	0	0	1	0
B. pseudolongum subsp. globosum	Quail	2017B	GCA_004155275.1	1	0	1	0	0	0	0	0	0	0	0	16	0	0	0	3	0	0	2	0	0	1	3	1	1	1	0	0	3	0	2	3	0	1	0	0	2	0	0	0	0	0	1	0
B. pseudolongum subsp. globosum	Pigeon	1550B	GCA_004155805.1	1	0	1	0	0	0	0	0	0	0	0	16	0	1	0	3	0	0	1	0	0	0	2	1	1	1	0	0	3	0	1	7	0	1	0	0	2	0	0	0	0	0	1	0
B. pseudolongum subsp. globosum	Pigeon	2048B	GCA_004155595.1	2	0	1	0	0	0	0	0	0	0	0	17	0	0	0	3	0	0	3	0	0	0	2	1	1	1	0	0	3	0	0	3	0	1	0	0	2	0	0	0	0	0	1	0
B. pseudolongum subsp. globosum	Porcupine	2115B	GCA_004156085.1	1	0	1	0	0	0	0	0	0	0	0	17	0	0	0	3	0	0	1	0	0	1	3	1	1	1	0	0	3	0	1	3	0	1	0	0	2	0	0	0	0	0	1	0
B. pseudolongum subsp. globosum	Porcupine	2114B	GCA_004154995.1	1	0	1	0	0	0	0	0	0	0	0	17	0	0	0	3	0	0	1	0	0	1	3	1	1	1	0	0	3	0	2	3	0	1	0	0	2	0	0	0	0	0	1	0
B. pseudolongum subsp. globosum	Quail	2049B	GCA_004156115.1	1	0	1	0	0	0	0	0	0	0	0	16	0	0	0	3	0	0	2	0	0	1	3	1	1	1	0	0	3	0	2	3	0	1	0	0	2	0	0	0	0	0	1	0
B. pseudolongum subsp. globosum	Duck	1578B	GCA_004155745.1	2	0	1	0	0	0	0	0	0	0	0	15	0	0	0	3	0	0	1	0	0	0	2	1	1	1	0	0	3	0	1	3	0	1	0	0	2	0	0	0	0	0	1	0
B. pseudolongum subsp. globosum	Rodent	1520B	GCA_002846775.1	1	0	1	0	0	0	0	0	0	1	0	16	0	0	0	2	0	0	0	0	0	1	3	1	1	1	0	0	3	0	3	3	0	1	0	0	2	0	0	0	0	0	1	0
B. pseudolongum subsp. globosum	Rodent	1524B	GCA_002846815.1	1	0	1	0	1	0	0	0	0	0	0	16	1	0	0	2	0	0	3	0	0	0	2	1	1	1	0	0	3	0	1	3	0	1	0	0	2	0	0	0	0	0	1	0
B. pseudolongum subsp. globosum	Rodent	2105B	GCA_004155505.1	1	0	1	0	0	0	0	0	0	0	0	16	0	0	0	3	0	0	1	0	0	1	3	1	1	1	0	0	3	0	4	3	0	1	0	0	2	0	0	0	0	0	1	0
B. pseudolongum subsp. globosum	Mouflon	2098B	GCA_004155495.1	1	0	1	0	0	0	0	0	0	0	0	16	0	0	0	3	0	0	2	0	0	0	2	1	1	1	0	0	3	0	1	4	0	1	0	0	2	0	0	0	0	0	1	0
B. pseudolongum subsp. globosum	Snake	2093B	GCA_004155535.1	1	0	1	0	0	0	0	0	0	1	0	15	0	0	0	3	0	0	1	0	0	1	2	1	2	1	0	0	3	0	1	3	0	1	0	0	2	0	0	0	0	0	1	0
B. pseudolongum subsp. globosum	Roe Deer	1791B	GCA_004155695.1	0	0	1	0	0	0	0	0	0	0	0	17	0	2	0	2	0	0	1	0	0	0	1	1	0	1	0	0	1	0	0	7	0	1	0	0	2	0	0	0	0	0	0	0
B. pseudolongum subsp. globosum	Fox	1770B	GCA_004155705.1	1	0	1	0	0	0	0	0	0	0	0	15	0	0	0	3	0	0	1	2	0	0	1	1	0	1	1	0	3	0	3	4	0	0	0	0	2	0	0	0	0	0	1	0
B. pseudolongum subsp. globosum	Dog	2054B	GCA_004155015.1	1	0	1	0	1	0	0	0	0	1	0	12	1	1	0	3	0	0	0	0	1	0	2	1	0	1	0	0	1	0	0	10	0	2	0	0	2	0	0	0	0	0	0	0
B. pseudolongum subsp. globosum	Dog	2071B	GCA_004155135.1	1	0	1	0	1	0	0	0	0	1	0	16	1	0	0	3	0	0	3	0	0	0	2	1	0	1	0	0	3	0	0	3	0	1	0	0	2	0	0	0	0	0	1	0
B. pseudolongum subsp. globosum	Dog	2012B	GCA_004155145.1	2	0	1	0	0	0	0	0	0	1	0	18	0	0	0	3	0	0	1	0	0	0	2	1	1	1	0	0	4	0	1	3	0	1	0	0	2	0	0	0	0	0	1	0
B. pseudolongum subsp. globosum	Dog	2000B	GCA_004155285.1	1	0	1	0	1	0	0	0	0	1	0	15	1	1	0	3	0	0	1	1	1	0	2	1	0	1	1	0	2	0	1	11	0	2	0	0	2	0	0	0	0	0	1	0
B. pseudolongum subsp. globosum	Dog	2003B	GCA_004155305.1	1	0	1	0	0	0	0	0	0	2	0	13	0	1	0	3	0	0	2	1	1	0	2	3	1	1	1	0	3	0	1	12	0	2	0	0	2	0	0	0	0	0	1	0
B. pseudolongum subsp. globosum	Dog	2001B	GCA_004155645.1	1	0	1	0	1	0	0	0	0	0	0	16	1	0	0	3	1	0	1	0	0	0	2	1	0	1	0	0	3	2	1	4	1	1	0	0	2	0	0	0	0	0	1	0
B. pseudolongum subsp. globosum	Pig	LMG 11571	GCA_000741325.1	1	0	1	0	1	0	0	0	0	0	0	13	1	1	0	3	0	0	1	0	0	0	2	1	0	1	0	0	1	0	0	7	0	1	0	0	2	0	0	0	0	0	0	0
B. pseudolongum subsp. globosum	Pig	1595B	GCA_002846725.1	1	0	1	0	0	0	0	0	0	0	0	14	0	0	0	3	0	0	1	0	0	1	3	1	2	1	0	0	2	0	1	4	0	1	0	0	2	0	0	0	0	0	1	0
B. pseudolongum subsp. globosum	Pig	1370B	GCA_002846755.1	1	0	1	0	1	0	0	0	0	0	0	14	1	0	0	3	0	0	1	0	0	0	2	1	1	1	0	0	2	0	0	3	0	1	0	0	2	0	0	0	0	0	0	0
B. pseudolongum subsp. globosum	Pig	1604B	GCA_004155395.1	1	0	1	0	1	0	0	0	0	0	0	15	1	0	0	3	0	0	0	0	0	0	2	1	0	1	0	0	2	0	1	4	0	1	0	0	2	0	0	0	0	0	0	0
B. pseudolongum subsp. globosum		2113B	GCA_004155295.1	1	0	1	0	0	0	0	0	0	0	0	16	0	0	0	3	0	0	2	0	0	0	2	1	1	1	0	0	3	0	1	4	0	1	0	0	2	0	0	0	0	0	1	0
B. pseudolongum subsp. globosum	Donkey	1565B	GCA_004155795.1	1	0	1	0	0	0	0	0	0	0	0	17	0	0	0	3	0	0	0	0	0	0	2	1	1	1	0	0	3	0	0	3	0	1	0	0	2	0	0	0	0	0	1	0
B. pseudolongum subsp. globosum	Rodent	2103B	GCA_004156175.1	2	0	1	0	1	0	0	0	0	0	0	15	1	0	0	3	0	1	1	0	0	1	3	1	2	1	0	0	2	0	1	3	0	1	0	0	2	0	0	0	0	0	1	0
B. pseudolongum subsp. globosum	Dog	2002B	GCA_004156235.1	1	0	1	0	1	0	0	0	0	1	0	14	1	1	0	3	0	0	2	1	0	0	2	1	0	1	1	0	3	0	1	7	0	1	0	0	2	0	0	0	0	0	1	0
B. pseudolongum subsp. globosum	Sewage	AS09scLD_379	GCA_012727475.1	0	0	1	0	0	0	0	0	0	0	0	16	0	0	0	2	0	0	2	0	0	0	2	1	0	1	0	0	1	0	0	3	0	0	0	0	2	0	0	0	0	0	0	0
B. pseudolongum subsp. pseudolongum	Human	PV8-2	GCA_000800475.2	1	0	1	0	0	0	0	0	0	0	0	13	0	1	0	3	0	0	1	0	0	0	2	1	1	1	0	0	3	0	1	7	0	1	0	0	2	0	0	0	0	0	1	0
B. pseudolongum subsp. pseudolongum	Human	AF13-3LB	GCA_003464845.1	1	0	1	0	0	0	0	0	0	0	0	17	0	1	0	3	0	0	0	0	0	1	3	1	2	1	0	0	3	0	2	7	0	1	0	0	2	0	0	0	0	0	1	0
B. pseudolongum subsp. pseudolongum	Tapir	1629B	GCA_004155725.1	0	0	1	0	1	0	0	0	0	0	0	13	1	0	0	2	0	0	0	0	0	0	2	1	0	1	0	0	1	0	0	4	0	1	0	0	2	0	0	0	0	0	0	0
B. pseudolongum subsp. pseudolongum	Rodent	UMB-MBP-01	GCA_002282915.1	1	0	1	0	0	0	0	0	0	0	0	17	0	0	0	3	0	1	0	0	0	1	3	1	2	1	0	0	3	0	1	3	0	1	0	0	2	0	0	0	0	0	1	0
B. pseudolongum subsp. pseudolongum	Rodent	WYJ21-P61	GCA_003612445.1	1	0	1	0	0	0	0	0	0	0	0	15	0	1	0	3	0	0	1	0	0	1	3	1	1	1	0	0	3	0	2	7	0	1	0	0	2	0	0	0	0	0	1	0
B. pseudolongum subsp. pseudolongum	Rodent	NM87_A27A	GCA_004801625.1	1	0	1	0	1	0	0	0	0	0	0	14	1	0	0	3	0	2	2	0	0	1	3	1	2	1	0	0	3	0	2	2	0	1	0	0	2	0	0	0	0	0	0	0
B. pseudolongum subsp. pseudolongum	Rodent	22-20	GCA_009911435.1	1	0	1	0	0	0	0	0	0	0	0	15	0	1	0	3	0	0	1	0	0	1	3	1	1	1	0	0	3	0	2	7	0	1	0	0	2	0	0	0	0	0	1	0
B. pseudolongum subsp. pseudolongum	Pig	1612B	GCA_004155715.1	1	0	1	0	1	0	0	0	0	0	0	14	1	0	0	3	0	0	2	0	0	0	2	1	0	1	0	0	2	0	0	3	0	1	0	0	2	0	0	0	0	0	0	0
B. pseudolongum subsp. pseudolongum	Pig	1513B	GCA_004155835.1	1	0	1	0	1	0	0	0	0	0	0	14	1	0	0	3	0	0	0	0	0	0	2	1	0	1	0	0	2	0	0	3	0	1	0	0	2	0	0	0	0	0	0	0
B. thermophilum	Infant	RBL67	GCF_000347695.1	0	0	1	0	0	0	0	0	0	0	0	14	0	0	0	0	0	0	1	0	0	0	1	0	1	2	0	0	1	0	1	0	3	1	0	0	2	0	0	0	0	0	0	0
B. thermophilum	Bovine	DSM 20212	GCF_000687575.1	0	0	1	0	0	0	0	0	0	0	0	16	0	0	0	0	0	0	1	0	0	0	1	0	1	1	0	0	1	0	1	0	1	1	0	0	2	0	0	0	0	0	0	0
B. thermophilum	Pig	DSM 20210	GCF_000771265.1	0	0	1	0	0	0	0	0	0	0	0	15	0	0	0	0	0	0	1	0	0	0	1	0	1	2	0	0	1	0	1	0	3	1	0	0	2	0	0	0	0	0	0	0
B. thermophilum	Pig	1543B	GCF_002846655.1	0	0	0	0	0	0	0	0	0	0	0	17	0	0	0	0	0	0	1	0	0	0	3	0	1	3	0	0	1	0	1	0	3	1	0	0	2	0	0	0	0	0	0	0
B. thermophilum	Pig	1542B	GCF_002846785.1	0	0	0	0	0	0	0	0	0	0	0	16	0	0	0	0	0	0	1	0	0	0	1	0	1	1	0	0	1	0	1	0	3	1	0	0	2	0	0	0	0	0	0	0
B. bifidum	Human	S6	GCA_003390735.1	1	1	0	1	2	0	0	1	0	0	1	6	1	0	0	3	4	1	2	0	0	1	1	0	0	0	2	0	1	0	1	2	0	0	0	0	1	0	0	2	0	1	0	1
B. bifidum	Human	LMG 11582	GCA_001020275.1	1	1	0	1	2	0	0	1	0	0	1	6	1	0	0	3	4	1	2	0	0	1	1	0	0	0	2	0	1	0	2	2	1	0	0	0	1	0	0	2	0	1	0	1
B. bifidum	Human	LMG 11583	GCA_001020335.1	1	1	0	1	2	0	0	0	0	0	1	6	1	0	0	3	4	1	1	0	0	1	1	0	0	0	1	0	1	0	1	2	0	0	0	0	1	0	0	2	0	1	0	1
B. bifidum	Human	ICIS-310	GCA_002114145.1	1	1	0	1	0	0	0	1	0	0	1	6	1	0	0	2	4	0	2	0	0	1	1	0	0	0	2	0	1	0	2	2	0	0	0	0	1	0	0	2	0	1	0	1
B. bifidum	Human	TM07-4AC	GCA_003436135.1	1	1	0	1	3	0	0	1	0	0	1	6	1	0	0	3	4	1	1	0	0	1	1	0	0	0	2	0	1	0	2	3	1	0	0	0	1	0	0	2	0	1	0	1
B. bifidum	Human	TF07-22	GCA_003437175.1	1	1	0	1	2	0	0	0	0	0	1	6	1	0	0	3	4	0	1	0	0	1	1	0	0	0	2	0	1	0	2	2	1	0	0	0	1	0	0	2	0	1	0	1
B. bifidum	Human	TF06-14AC	GCA_003437325.1	1	1	0	1	2	0	0	1	0	0	1	6	0	0	0	3	4	0	2	0	0	1	1	0	0	0	2	0	1	0	1	2	0	0	0	0	1	0	0	2	0	1	0	1
B. bifidum	Human	AF11-25B	GCA_003465425.1	2	1	0	1	2	0	0	1	0	0	1	6	1	0	0	3	4	1	1	0	0	1	1	0	0	0	2	0	1	0	2	3	0	0	0	0	1	0	0	2	0	1	0	1
B. bifidum	Human	TM06-5	GCA_003466365.1	2	1	0	1	3	0	0	1	0	0	1	6	1	0	0	3	4	1	1	0	0	1	1	0	0	0	2	0	1	0	2	2	0	0	0	0	1	0	0	2	0	1	0	1
B. bifidum	Human	AM42-15AC	GCA_003467985.1	2	1	0	1	2	0	0	1	0	0	1	6	1	0	0	3	4	1	1	0	0	1	1	0	0	0	2	0	1	0	1	3	0	0	0	0	1	0	0	2	0	1	0	1
B. bifidum	Human	AM36-1AC	GCA_003468415.1	1	1	0	1	2	0	0	1	0	0	1	6	1	0	0	3	4	0	2	0	0	1	1	0	0	0	2	0	1	0	2	3	0	0	0	0	1	0	0	2	0	1	0	1
B. bifidum	Human	AM18-29	GCA_003470585.1	1	1	0	1	2	0	0	1	0	0	1	6	0	0	0	3	4	1	2	0	0	1	1	0	0	0	2	0	1	0	1	2	0	0	0	0	1	0	0	2	0	1	0	1
B. bifidum	Human	AM18-12AC	GCA_003470615.1	1	1	0	1	2	0	0	1	0	0	1	6	0	0	0	3	4	1	2	0	0	1	1	0	0	0	2	0	1	0	1	2	0	0	0	0	1	0	0	2	0	1	0	1
B. bifidum	Human	AF45-10	GCA_003474045.1	1	1	0	1	0	0	0	1	0	0	1	6	1	0	0	3	4	0	1	0	0	1	1	0	0	0	2	0	1	0	2	3	1	0	0	0	1	0	0	2	0	1	0	1
B. bifidum	Human	S791	GCA_001595435.1	1	1	0	1	2	0	0	1	0	0	1	6	1	0	0	2	4	0	2	0	0	1	1	0	0	0	2	0	1	0	2	2	0	0	0	0	1	0	0	2	0	1	0	1
B. bifidum	Human	LMAG:79	GCA_008679685.1	1	1	0	1	2	0	0	1	0	0	1	6	1	0	0	3	4	0	1	0	0	1	1	0	0	0	2	0	1	0	1	3	1	0	0	0	1	0	0	2	0	1	0	1
B. bifidum	Human	LMAG:66	GCA_008679935.1	1	1	0	1	2	0	0	2	0	0	1	4	1	0	0	3	4	0	1	0	0	1	1	0	0	0	2	0	1	0	1	2	0	0	0	0	1	0	0	2	0	1	0	1
B. bifidum	Human	LMAG:12	GCA_008681015.1	1	1	0	1	2	0	0	1	0	0	1	6	1	0	0	3	4	0	1	0	0	1	1	0	0	0	2	0	1	0	1	2	0	0	0	0	1	0	0	2	0	1	0	1
B. bifidum	Human	BIO5480	GCA_008868415.1	1	1	0	1	0	0	0	0	0	0	1	6	0	0	0	3	4	1	1	0	0	1	1	0	0	0	1	0	1	0	1	2	0	0	0	0	1	0	0	2	0	1	0	1
B. bifidum	Human	ca_0067	GCA_004167365.1	1	1	0	1	2	0	0	1	0	0	1	6	1	0	0	3	4	0	1	0	0	1	1	0	0	0	2	0	1	0	1	3	0	0	0	0	1	0	0	2	0	1	0	1
B. bifidum	Human	BSD2780061688st1_G1	GCA_005844205.1	1	1	0	1	2	0	0	1	0	0	1	6	1	0	0	3	4	0	2	0	0	1	1	0	0	0	2	0	1	0	2	2	0	0	0	0	1	0	0	2	0	1	0	1
B. bifidum	Human	1001271st1_H11	GCA_005844365.1	0	1	0	1	1	0	0	0	0	0	1	6	1	0	0	3	4	1	1	0	0	1	1	0	0	0	2	0	1	0	2	2	0	0	0	0	1	0	0	2	0	1	0	1
B. bifidum	Infant	BF3	GCA_001281345.1	2	1	0	1	2	0	0	1	0	0	1	6	1	0	0	3	4	1	2	0	0	1	1	0	0	0	2	0	1	0	2	2	0	0	0	0	1	0	0	2	0	1	0	1
B. bifidum	Infant	IPLA 20017	GCA_001020265.1	1	1	0	1	2	0	0	0	0	0	1	5	0	0	0	3	4	0	1	0	0	1	1	0	0	0	2	0	1	0	1	2	1	0	0	0	1	0	0	2	0	1	0	1
B. bifidum	Infant	A8	GCA_001020245.1	1	1	0	1	2	0	0	1	0	0	1	6	1	0	0	3	4	1	2	0	0	1	1	0	0	0	2	0	1	0	2	2	1	0	0	0	1	0	0	2	0	1	0	1
B. bifidum	Infant	156B	GCA_001020255.1	1	1	0	1	2	0	0	0	0	0	1	6	1	0	0	3	4	0	1	0	0	1	1	0	0	0	2	0	1	0	1	3	0	0	0	0	1	0	0	2	0	1	0	1
B. bifidum	Infant	LMG 13200	GCA_001020325.1	1	1	0	1	2	0	0	0	0	0	1	6	1	0	0	3	4	1	1	0	0	1	1	0	0	0	2	0	1	0	1	3	0	0	0	0	1	0	0	2	0	1	0	1
B. bifidum	Infant	85B	GCA_001020355.1	1	1	0	1	2	0	0	1	0	0	1	6	1	0	0	3	4	1	1	0	0	1	1	0	0	0	2	0	1	0	2	3	0	0	0	0	1	0	0	2	0	1	0	1
B. bifidum	Infant	324B	GCA_001020375.1	1	1	0	1	2	0	0	1	0	0	1	6	1	0	0	3	4	0	2	0	0	1	1	0	0	0	2	0	1	0	2	3	0	0	0	0	1	0	0	2	0	1	0	1
B. bifidum	Infant	IPLA 20015	GCA_001020405.1	1	1	0	1	2	0	0	1	0	0	1	6	1	0	0	3	4	0	1	0	0	1	1	0	0	0	2	0	1	0	1	2	0	0	0	0	1	0	0	2	0	1	0	1
B. bifidum	Infant	LMG 11041	GCA_000741085.1	2	1	0	1	2	0	0	1	0	0	1	6	1	0	0	3	4	0	2	0	0	1	1	0	0	0	3	0	1	0	2	3	0	0	0	0	1	0	0	2	0	1	0	1
B. bifidum	Human Milk	1887B	GCA_002076105.1	1	1	0	1	2	0	0	1	0	0	1	6	0	0	0	3	4	0	2	0	0	1	1	0	0	0	2	0	1	0	2	3	0	0	0	0	1	0	0	2	0	1	0	1
B. bifidum	Commercial dietary supplements	DS33_23	GCA_003094645.1	1	1	0	1	1	0	0	1	0	0	1	6	0	0	0	3	4	1	2	0	0	1	1	0	0	0	2	0	1	0	2	2	1	0	0	0	1	0	0	2	0	1	0	1
B. bifidum	Commercial dietary supplements	DS30_23	GCA_003094755.1	1	1	0	1	2	0	0	1	0	0	1	6	1	0	0	2	4	1	2	0	0	1	1	0	0	0	2	0	1	0	2	2	1	0	0	0	1	0	0	2	0	1	0	1
B. bifidum	Commercial dietary supplements	DS26_23	GCA_003095035.1	1	1	0	1	0	0	0	1	0	0	1	6	0	0	0	3	4	1	2	0	0	1	1	0	0	0	2	0	1	0	2	2	1	0	0	0	1	0	0	2	0	1	0	1
B. bifidum	Vagina	VA07-1AN	GCA_011029205.1	1	1	0	1	0	0	0	1	0	0	1	6	0	0	0	3	4	0	1	0	0	1	1	0	0	0	2	0	1	0	2	2	0	0	0	0	1	0	0	2	0	1	0	1
B. breve	Human	DSM 20213	GCA_000158015.1	2	0	0	0	1	0	0	0	1	2	1	14	0	0	0	5	1	0	1	0	0	0	6	1	2	2	1	1	1	3	2	0	2	0	1	1	2	0	0	0	1	0	0	1
B. breve	Human	DPC 6330	GCA_000226175.2	2	0	0	0	1	0	0	0	1	0	1	13	0	0	0	2	1	0	2	0	0	0	5	0	1	2	1	0	1	2	3	1	2	0	1	0	2	0	0	0	1	0	0	1
B. breve	Human	MCC 0476	GCA_001263845.1	1	0	0	0	1	0	0	0	1	1	1	13	0	0	0	3	1	0	1	0	0	0	5	0	2	2	1	0	1	3	2	0	2	0	1	1	2	0	0	0	1	0	0	1
B. breve	Human	MCC 0121	GCA_001264045.1	0	0	0	0	0	0	0	0	1	1	0	9	0	1	0	1	0	0	0	0	0	0	3	0	1	1	1	0	0	3	0	0	2	0	0	1	1	0	0	0	1	0	0	1
B. breve	Human	MCC 1604	GCA_001264155.1	1	0	0	0	1	0	0	0	1	1	1	12	0	0	0	2	1	0	1	0	0	0	4	1	0	2	1	0	1	2	2	0	2	0	1	0	2	1	0	0	0	0	0	1
B. breve	Human	BR-06	GCA_001685705.1	1	0	0	0	1	0	0	0	1	1	1	12	0	0	0	3	1	0	1	0	0	0	3	0	1	2	1	0	1	2	2	0	2	0	1	0	2	0	0	0	0	0	0	1
B. breve	Human	BR-19	GCA_001685805.1	2	0	0	0	1	0	0	0	1	1	1	14	0	0	0	3	1	1	1	0	0	0	4	0	1	3	1	1	1	2	2	0	2	0	1	1	2	1	0	0	0	0	0	1
B. breve	Human	BR-L29	GCA_001685945.1	2	0	0	0	1	0	0	0	1	1	1	13	0	0	0	3	1	0	1	0	0	0	4	0	2	2	1	0	1	3	2	0	2	0	1	1	2	0	0	0	1	0	0	1
B. breve	Human	UMB0915	GCA_002861455.1	2	0	0	0	1	0	0	0	1	0	1	14	0	1	0	5	1	0	3	0	0	0	7	0	0	1	1	0	2	2	2	0	2	0	1	1	2	0	0	0	0	0	1	1
B. breve	Human	UMB0089	GCA_002871815.1	1	0	0	0	1	0	0	0	1	0	1	13	0	1	0	2	1	0	1	0	0	0	4	0	1	2	1	0	1	2	2	0	2	0	1	0	2	0	0	0	0	0	0	1
B. breve	Human	Bifido_10	GCA_900157105.1	1	0	0	0	0	0	0	0	1	1	1	13	0	0	0	3	1	1	1	0	0	0	3	0	1	3	1	0	1	2	2	1	2	0	1	1	2	0	0	0	0	0	0	1
B. breve	Human	Bifido_07	GCA_900157125.1	2	0	0	0	1	0	0	0	1	1	1	12	0	0	0	4	1	0	1	0	0	0	5	0	0	1	1	0	1	2	3	1	2	0	1	1	2	0	0	0	0	0	0	1
B. breve	Human	SC95	GCA_006546585.1	1	0	0	0	1	0	0	0	1	1	1	13	0	0	0	2	1	0	3	0	0	1	4	0	1	2	1	0	1	2	3	1	2	0	1	0	2	0	0	0	0	0	0	1
B. breve	Human	JR01	GCA_009931415.1	1	0	0	0	1	0	0	0	1	1	1	12	0	0	0	2	1	1	1	0	0	0	5	0	0	1	1	0	1	2	2	0	2	0	0	0	2	0	0	0	0	0	0	1
B. breve	Infant	JTL	GCA_013267755.1	2	0	0	0	1	0	0	0	1	1	1	14	0	0	0	4	1	1	1	0	0	0	5	0	1	2	1	0	1	2	2	0	2	0	1	1	2	0	0	0	0	0	0	1
B. breve	Infant	MCC 1094	GCA_001264095.1	1	0	0	0	1	0	0	0	1	1	1	15	0	0	0	4	1	1	2	0	0	0	5	1	2	3	1	0	1	3	2	0	4	0	0	1	1	0	0	0	1	0	0	1
B. breve	Infant	BR3	GCA_001281425.1	2	0	0	0	1	0	0	0	1	1	1	10	0	0	0	4	1	0	1	0	0	0	3	0	1	2	1	1	1	2	2	0	2	0	1	1	2	0	0	0	0	0	0	1
B. breve	Infant	MCC 1114	GCA_001263855.1	1	0	0	0	1	0	0	0	1	1	1	13	0	0	0	3	1	0	1	0	0	0	5	0	2	2	1	0	1	3	2	0	2	0	1	1	2	0	0	0	1	0	0	1
B. breve	Infant	LMG 13208	GCA_000741125.1	3	0	0	0	1	0	0	0	1	0	1	14	0	1	0	5	1	1	1	0	0	0	7	2	0	2	1	0	1	2	2	0	1	0	1	0	2	1	0	0	1	0	0	1
B. breve	Infant	BBRI4	GCA_001189355.1	2	0	0	0	1	0	0	0	1	1	1	15	0	0	0	2	1	0	3	0	0	0	3	0	1	2	1	0	1	2	3	1	2	0	1	0	2	0	0	0	0	0	0	1
B. breve	Infant	S141.3	GCA_001576875.1	2	0	0	0	1	0	0	0	1	1	1	13	0	0	0	2	1	1	2	0	0	0	4	0	2	3	1	0	1	3	3	1	2	0	0	0	2	0	0	0	1	0	0	1
B. breve	Infant	1900B	GCA_002075865.1	1	0	0	0	1	0	0	0	1	1	1	12	0	0	0	2	1	1	1	0	0	0	5	0	0	1	1	0	1	2	2	0	2	0	0	0	2	0	0	0	0	0	0	1
B. breve	Infant	1891B	GCA_002076055.1	1	0	0	0	1	0	0	0	1	1	1	14	0	0	0	3	1	0	2	0	0	0	6	0	0	0	0	1	1	2	3	1	2	0	1	0	2	0	0	0	0	0	1	1
B. breve	Infant	1889B	GCA_002076075.1	1	0	0	0	1	0	0	0	1	1	1	12	0	0	0	3	1	0	2	0	0	0	6	0	0	0	0	1	1	2	3	1	2	0	1	0	2	0	0	0	0	0	1	1
B. breve	Infant	7E	GCA_002271275.1	1	0	0	0	1	0	0	0	1	1	1	12	0	0	0	3	1	0	1	0	0	0	4	0	1	1	1	1	1	3	2	0	2	0	1	1	2	0	0	0	1	0	0	1
B. breve	Infant	DRBB26	GCA_002838225.1	1	0	0	0	1	0	0	0	1	0	1	13	0	1	0	3	1	0	3	0	0	1	5	0	2	2	1	1	1	3	2	0	2	0	0	0	2	0	0	0	1	0	0	1
B. breve	Infant	NRBB56	GCA_002838425.1	1	0	0	0	1	0	0	0	1	1	1	13	0	1	0	4	1	0	2	0	0	1	4	0	2	2	1	1	1	3	2	0	2	0	1	1	2	0	0	0	1	0	0	1
B. breve	Infant	DRBB27	GCA_002838445.1	1	0	0	0	1	0	0	0	1	1	1	13	0	1	0	3	1	0	2	0	0	1	5	1	2	3	1	1	1	3	2	0	2	0	1	0	2	1	0	0	1	0	0	1
B. breve	Infant	017W439	GCA_002838465.1	1	0	0	0	1	0	0	0	1	1	1	13	0	0	0	3	1	0	1	0	0	0	4	0	2	2	1	0	1	3	2	0	2	0	1	1	2	0	0	0	1	0	0	2
B. breve	Infant	215W447a	GCA_002838485.1	1	0	0	0	1	0	0	0	1	1	1	13	0	0	0	2	1	1	1	0	0	0	3	0	0	1	1	0	1	2	2	1	2	0	1	0	2	0	0	0	0	0	0	2
B. breve	Infant	DRBB28	GCA_002838505.1	2	0	0	0	1	0	0	0	1	1	1	14	0	0	0	4	1	1	1	0	0	0	5	0	1	2	1	0	1	2	2	0	2	0	1	1	2	0	0	0	0	0	0	2
B. breve	Infant	180W83	GCA_002838525.1	1	0	0	0	1	0	0	0	1	1	1	12	0	0	0	3	1	0	1	0	0	0	5	0	0	1	1	0	1	2	2	0	2	0	1	1	2	1	0	0	0	0	0	1
B. breve	Infant	082W48	GCA_002838545.1	1	0	0	0	1	0	0	0	1	1	1	12	0	0	0	3	1	0	1	0	0	0	4	0	0	1	0	0	1	2	2	0	2	0	1	1	2	0	0	0	0	0	0	1
B. breve	Infant	139W423	GCA_002838565.1	1	0	0	0	1	0	0	0	1	1	1	13	0	0	0	2	1	0	3	0	0	1	4	0	1	2	1	0	1	2	3	1	2	0	1	0	2	0	0	0	0	0	0	1
B. breve	Infant	CNCM I-4321	GCA_002838585.1	1	0	0	0	1	0	0	0	1	0	1	14	0	0	0	3	1	0	1	0	0	0	5	0	1	3	1	0	1	2	3	1	2	0	1	1	2	0	0	0	1	0	0	1
B. breve	Infant	NRBB18	GCA_002838605.1	2	0	0	0	1	0	0	0	1	0	1	13	0	1	0	4	1	0	1	0	0	0	5	0	1	2	1	0	1	3	2	0	2	0	0	1	2	0	0	0	1	0	0	1
B. breve	Infant	NRBB49	GCA_002838685.1	2	0	0	0	1	0	0	0	0	1	1	14	0	0	0	5	1	1	1	0	0	0	5	1	1	2	1	1	1	0	2	0	1	0	1	1	2	0	0	0	0	0	0	1
B. breve	Infant	lw01	GCA_003860285.1	1	0	0	0	1	0	0	0	1	0	1	13	0	0	0	2	1	0	2	0	0	0	6	0	0	1	1	1	1	2	3	1	2	0	1	0	2	0	0	0	1	0	0	1
B. breve	Infant	BR03	GCA_004319685.1	2	0	0	0	1	0	0	0	1	1	1	11	0	0	0	2	1	0	2	0	0	0	3	1	1	1	1	0	1	3	2	0	2	0	0	0	2	2	0	0	1	0	0	1
B. breve	Infant	IDCC4401	GCA_009429085.1	1	0	0	0	1	0	0	0	1	1	1	13	0	0	0	3	1	0	1	0	0	0	5	0	2	2	1	0	1	3	2	0	2	0	1	1	2	0	0	0	1	0	0	1
B. breve	Infant	JSRL01	GCA_009498435.1	1	0	0	0	1	0	0	0	1	1	0	12	0	0	0	2	1	0	1	0	0	0	5	0	0	1	1	0	1	2	2	0	2	0	0	0	2	0	0	0	0	0	0	1
B. breve	Infant	NCTC11815	GCA_900637145.1	1	0	0	0	0	0	0	0	1	0	1	12	0	1	0	3	1	0	1	0	0	0	5	1	2	3	1	1	1	3	2	0	2	0	1	0	2	1	0	0	1	0	0	1
B. breve	Infant	LH_24	GCA_902505445.1	1	0	0	0	1	0	0	0	1	0	1	12	0	1	0	3	1	0	1	0	0	0	4	1	2	2	1	1	1	3	2	0	2	0	1	0	2	1	0	0	1	0	0	1
B. breve	Infant	LH_21	GCA_902505485.1	2	0	0	0	2	0	0	0	1	0	1	11	0	0	0	2	1	0	0	0	0	0	4	0	0	1	1	0	1	1	2	1	1	0	0	0	1	0	0	0	0	0	0	1
B. breve	Human Milk	CECT 7263	GCA_000247755.2	3	0	0	0	1	0	0	0	1	1	1	12	0	1	0	4	1	0	2	0	0	0	4	1	1	1	1	1	1	3	2	0	2	0	0	0	2	1	0	0	1	0	0	1
B. breve	Human Milk	31L	GCA_000568875.1	2	0	0	0	1	0	0	0	1	1	1	13	0	0	0	3	1	0	1	0	0	0	5	0	1	2	1	0	1	2	2	0	2	0	1	1	2	0	0	0	1	0	0	1
B. breve	Human Milk	2L	GCA_000568895.1	1	0	0	0	1	0	0	0	1	1	1	12	0	0	0	2	1	1	1	0	0	0	5	0	0	1	1	0	1	2	2	0	2	0	0	0	2	0	0	0	0	0	0	1
B. breve	Human Milk	CECT7263	GCA_002027265.1	1	0	0	0	1	0	0	0	1	0	1	15	0	0	0	2	1	0	2	0	0	0	4	0	1	2	1	0	1	2	3	1	2	0	0	0	2	0	0	0	0	0	0	1
B. breve	Human Milk	INIA P734	GCA_901980275.1	0	0	0	0	1	0	0	0	1	0	1	13	0	0	0	2	1	1	1	0	0	0	3	0	1	1	1	0	1	3	2	1	2	0	1	0	2	0	0	0	1	0	0	1
B. breve	Food product - supplement	LMG S-29190	GCA_002914865.1	1	0	0	0	1	0	0	0	1	0	1	14	0	1	0	3	1	0	1	0	0	0	5	0	2	2	1	0	1	3	3	1	2	0	1	1	2	0	0	0	1	0	0	1
B. breve	Fermented food	UBBR-01	GCA_004802595.1	3	0	0	0	1	0	0	0	1	1	1	15	0	0	0	2	1	0	3	0	0	0	5	1	1	1	1	1	1	3	2	1	2	0	1	0	2	1	0	0	1	0	1	1
B. breve	Commercial dietary supplements	DS15_17	GCA_003095095.1	1	0	0	0	1	0	0	0	1	1	1	13	0	0	0	2	1	0	4	0	0	0	5	0	1	2	1	0	1	2	2	0	2	0	1	0	2	0	0	0	0	0	0	1
B. breve	Vagina	ACS-071-V-Sch8b	GCA_000213865.1	2	0	0	0	1	0	0	1	1	1	1	14	0	0	0	4	1	1	3	0	0	0	5	0	1	2	1	0	1	2	2	0	2	0	1	1	2	0	0	0	1	0	0	1
B. breve	Vagina	JCP7499	GCA_000466545.1	1	0	0	0	1	0	0	0	1	1	1	13	0	0	0	3	1	0	1	0	0	0	6	1	0	1	1	0	1	2	2	0	2	0	1	0	2	1	0	0	1	0	0	1
B. breve	Vagina	GED8481	GCA_001546235.1	2	0	0	0	1	0	0	0	1	1	1	14	0	0	0	2	1	0	1	0	0	0	5	0	2	3	1	0	1	2	2	0	2	0	1	0	3	0	0	0	1	0	0	1
B. breve	Vagina	N6D12	GCA_003370105.1	1	0	0	0	1	0	0	0	1	1	1	13	0	1	0	3	1	0	1	0	0	0	5	0	1	2	1	0	1	2	3	1	2	0	1	0	2	0	0	0	0	0	0	1
B. breve	Vagina	W20-13	GCA_003370125.1	2	0	0	0	1	0	0	0	1	1	1	13	0	0	0	2	1	0	1	0	0	0	4	0	1	2	1	0	1	2	2	0	2	0	1	0	2	0	0	0	1	0	0	1
B. breve	Vagina	S12-4	GCA_003370155.1	1	0	0	0	1	0	0	0	1	0	1	13	0	1	0	3	1	0	2	0	0	0	5	1	2	3	1	1	1	3	2	0	2	0	1	0	2	1	0	0	1	0	0	1
B. breve	Vagina	322-1	GCA_003370175.1	1	0	0	0	1	0	0	0	1	1	1	12	0	0	0	3	1	1	2	0	0	0	3	0	0	1	1	0	1	2	3	1	2	0	1	1	2	0	0	0	0	0	0	1
B. breve	Vagina	30-1	GCA_003370195.1	1	0	0	0	1	0	0	0	1	1	1	13	0	0	0	2	1	0	1	0	0	0	6	0	1	2	1	0	1	2	3	1	2	0	1	0	2	1	0	0	1	0	0	1
B. breve	Vagina	W56	GCA_003370265.1	1	0	0	0	1	0	0	0	1	1	1	13	0	0	0	2	1	0	1	0	0	0	6	0	1	2	1	0	1	2	3	1	2	0	1	0	2	1	0	0	1	0	0	1
B. breve	Vagina	91-1	GCA_003370295.1	1	0	0	0	1	0	0	0	1	1	1	12	0	0	0	2	1	1	1	0	0	0	5	0	0	1	1	0	1	2	2	0	2	0	0	0	2	0	0	0	0	0	0	1
B. breve	Free-living	LMC520	GCA_001990225.1	1	0	0	0	1	0	0	0	1	0	1	15	0	0	0	2	1	0	2	0	0	0	4	0	1	2	1	0	1	2	3	1	2	0	0	0	2	0	0	0	0	0	0	1
B. breve	Basil	B.breve_2_mod	GCA_902167575.1	1	0	0	0	1	0	0	0	1	0	1	11	0	0	0	3	1	0	1	0	0	0	4	1	2	2	1	1	1	3	1	0	2	0	1	0	2	1	0	0	0	0	0	1
B. breve		UCC2003	GCA_000220135.1	1	0	0	0	1	0	0	0	1	1	1	13	0	0	0	2	1	1	1	0	0	0	3	0	0	1	1	0	1	2	2	1	2	0	1	0	2	0	0	0	0	0	0	1
B. breve		HPH0326	GCA_000411435.1	1	0	0	0	1	0	0	0	1	1	1	12	0	0	0	3	1	0	1	0	0	0	5	0	1	1	1	0	1	3	2	0	2	0	1	1	2	0	0	0	1	0	0	1
B. breve		12L	GCA_000568955.1	1	0	0	0	1	0	0	0	1	1	1	12	0	0	0	2	1	1	1	0	0	0	5	0	0	1	1	0	1	2	2	0	2	0	0	0	2	0	0	0	0	0	0	1
B. breve		JCM 7017	GCA_000568975.1	2	0	0	0	1	0	0	0	1	0	1	14	0	1	0	4	1	0	0	0	0	0	4	0	1	0	1	0	1	3	2	0	2	0	0	0	2	0	0	0	1	0	0	1
B. breve		JCM 7019	GCA_000569015.1	2	0	0	0	1	0	0	0	1	0	1	14	0	0	0	4	1	1	1	0	0	0	5	0	0	2	1	0	1	2	2	1	2	0	1	1	2	0	0	0	0	0	0	1
B. breve		NCFB 2258	GCA_000569035.1	0	0	0	0	1	0	0	0	0	0	1	12	0	0	0	2	1	0	1	0	0	0	4	0	1	2	1	0	1	0	2	1	1	1	0	0	2	0	0	0	0	0	0	1
B. breve		689b	GCA_000569055.1	2	0	0	0	1	0	0	0	1	2	1	14	0	0	0	5	1	0	1	0	0	0	6	1	2	2	1	1	1	3	2	0	2	0	1	1	2	0	0	0	1	0	0	1
B. breve		S27	GCA_000569075.1	1	0	0	0	1	0	0	0	1	1	1	13	0	0	0	3	1	0	1	0	0	0	5	0	2	2	1	0	1	3	2	0	2	0	1	1	2	0	0	0	1	0	0	1
B. breve		JCM 1192	GCA_001025175.1	1	0	0	0	1	0	0	0	1	1	1	12	0	0	0	2	1	1	1	0	0	0	5	0	0	1	1	0	1	2	2	0	2	0	0	0	2	0	0	0	0	0	0	1
B. breve		FDAARGOS_561	GCA_003813065.1	1	0	0	0	1	0	0	0	1	0	1	13	0	0	0	2	1	0	2	0	0	0	6	0	0	1	1	1	1	2	3	1	2	0	1	0	2	0	0	0	1	0	0	1
B. breve		BIO6018	GCA_008868405.1	2	0	0	0	1	0	0	0	1	2	1	14	0	0	0	4	0	0	1	0	0	0	5	1	2	2	1	1	1	3	2	0	2	0	1	1	2	0	0	0	1	0	0	1
B. breve		RP2	GCA_900102865.1	1	0	0	0	1	0	0	0	1	1	1	11	0	0	0	3	1	0	1	0	0	0	5	0	1	2	1	0	1	2	2	0	2	0	1	1	2	0	0	0	1	0	0	1
B. breve		MC1	GCA_901212525.1	1	0	0	0	1	0	0	0	1	0	1	11	0	1	0	3	1	0	1	0	0	0	5	1	2	3	1	1	1	3	2	0	2	0	1	0	2	1	0	0	1	0	0	1
B. breve		B.breve_1_mod	GCA_902167875.1	1	0	0	0	1	0	0	0	1	1	1	10	0	0	0	2	1	0	0	0	0	0	3	0	0	1	1	1	1	2	3	0	2	0	1	0	2	0	0	0	0	0	0	1
B. breve		JG_Bg463	GCA_902167895.1	1	0	0	0	1	0	0	0	1	0	1	10	0	0	0	3	1	0	2	0	0	0	5	0	0	2	1	0	1	2	2	0	2	0	1	0	2	0	0	0	1	0	0	1
B. breve		MGYG-HGUT-02469	GCA_902387425.1	1	0	0	0	1	0	0	0	1	1	1	11	0	0	0	4	1	1	0	0	0	0	4	1	1	2	1	0	1	1	2	0	1	0	1	0	2	0	0	0	0	0	0	1
B. longum subsp. infantis	Human	CCUG 52486	GCA_000155415.1	0	1	0	0	1	1	1	0	0	2	1	10	0	0	0	1	1	0	0	0	1	0	3	1	2	1	0	1	0	0	2	17	1	4	0	0	2	0	0	0	0	0	0	0
B. longum subsp. infantis	Human	EK3	GCA_000730125.1	2	0	1	0	1	1	0	0	1	0	1	8	0	0	0	2	2	0	1	0	0	1	1	0	0	2	2	1	3	1	2	2	2	1	0	0	2	0	0	0	0	0	0	1
B. longum subsp. infantis	Human	BIC1206122787	GCA_000825005.1	1	0	0	0	1	0	0	0	1	0	1	8	0	0	0	2	3	0	3	0	0	1	2	0	0	3	2	1	2	0	3	1	2	1	0	0	2	0	0	0	0	0	0	1
B. longum subsp. infantis	Human	BIC1401111250	GCA_000825045.1	1	0	0	0	1	0	0	0	1	0	1	8	0	0	0	2	3	0	3	0	0	1	2	0	0	3	2	1	2	0	3	1	2	1	0	0	2	0	0	0	0	0	0	1
B. longum subsp. infantis	Human	BI-G201	GCA_013204895.1	2	0	1	0	1	1	0	0	1	0	1	7	0	0	0	2	2	0	1	0	0	1	1	0	0	2	2	1	3	1	2	2	2	1	0	0	2	0	0	0	0	0	0	1
B. longum subsp. infantis	Infant	BT1	GCA_001281305.1	0	0	0	0	1	0	0	0	1	0	1	8	0	0	0	2	3	0	0	0	0	3	4	0	0	1	2	1	2	0	2	0	3	1	0	0	2	0	0	0	1	0	0	1
B. longum subsp. infantis	Infant	TPY12-1	GCA_001870755.1	1	0	0	0	1	0	0	1	1	0	1	8	1	0	0	2	2	1	1	0	0	2	3	0	2	1	2	1	2	0	2	2	3	1	0	0	2	0	0	0	1	0	0	1
B. longum subsp. infantis	Infant	1888B	GCA_002076025.1	0	0	0	0	1	0	0	0	1	0	1	8	0	0	0	2	3	0	0	0	0	2	4	0	0	1	2	1	2	0	2	0	3	1	0	0	2	0	0	0	1	0	0	1
B. longum subsp. infantis	Infant	Bi-26	GCA_004919065.2	2	0	1	0	1	1	0	0	1	0	1	8	0	0	0	2	2	0	1	0	0	3	1	0	0	2	2	1	3	1	2	2	2	1	0	0	2	0	0	0	0	0	0	1
B. longum subsp. infantis	Infant	BIO5478	GCA_008868445.1	2	0	1	0	1	1	0	0	1	0	1	8	0	0	0	2	2	0	1	0	0	3	1	0	0	2	2	1	3	1	2	2	2	1	0	0	2	0	0	0	0	0	0	1
B. longum subsp. infantis	Infant	LH_665	GCA_902505515.1	1	0	0	0	1	0	0	1	1	0	1	8	1	0	0	2	2	0	1	0	0	1	2	0	0	3	2	1	3	1	3	1	2	1	0	0	2	0	0	0	0	0	0	1
B. longum subsp. infantis	Infant	LH_666	GCA_902505525.1	1	0	0	0	1	1	0	1	1	0	1	8	1	0	0	2	2	0	1	0	0	2	2	0	0	3	2	1	3	1	3	3	2	1	0	0	2	0	0	0	0	0	0	1
B. longum subsp. infantis	Infant	LH_23	GCA_902505535.1	1	0	1	0	1	0	0	1	1	0	1	9	1	0	0	2	2	0	2	0	0	2	2	0	1	3	2	1	2	0	3	2	2	1	0	0	2	0	0	0	0	0	0	1
B. longum subsp. infantis	Infant	LH_664	GCA_902505555.1	1	0	0	0	1	0	0	1	1	0	1	8	1	0	0	2	2	0	1	0	0	3	2	0	0	3	2	1	3	1	3	1	2	1	0	0	2	0	0	0	0	0	0	1
B. longum subsp. infantis	Fermented food	UBBI-01	GCA_004803425.1	1	0	1	0	1	0	0	1	1	0	1	9	1	0	0	2	2	0	1	0	0	1	2	0	1	3	2	1	2	0	2	1	3	1	0	0	2	0	0	0	1	0	0	1
B. longum subsp. infantis		ATCC 15697	GCA_000020425.1	1	0	0	0	1	0	0	0	1	0	1	8	0	0	0	2	3	0	4	0	0	3	2	0	0	3	2	1	2	0	3	1	2	1	0	0	2	0	0	0	0	0	0	1
B. longum subsp. infantis		157F	GCA_000196575.1	0	1	0	0	1	1	1	0	1	2	1	9	0	0	0	2	1	1	1	0	1	0	5	1	2	1	0	1	2	0	2	7	2	4	1	1	2	0	0	0	0	0	0	0
B. longum subsp. infantis		JCM 1222	GCA_000269965.1	1	0	0	0	1	0	0	0	1	0	1	8	0	0	0	2	3	0	4	0	0	3	2	0	0	3	2	1	2	0	3	1	2	1	0	0	2	0	0	0	0	0	0	1
B. longum subsp. infantis		DSM 20088	GCA_000771105.1	1	0	0	0	1	0	0	0	1	0	1	8	0	0	0	2	3	0	2	0	0	1	2	0	0	3	2	1	0	0	3	1	2	1	0	0	2	0	0	0	0	0	0	1
B. longum subsp. infantis	Free-living	BIC1307292462	GCA_000825025.1	1	0	0	0	1	0	0	0	1	0	1	8	0	0	0	2	3	0	3	0	0	1	2	0	0	5	2	1	2	0	3	1	2	1	0	0	2	0	0	0	0	0	0	1
B. longum subsp. infantis	Free-living	BIC1401212621a	GCA_000825065.1	1	0	0	0	1	0	0	0	1	0	1	8	0	0	0	2	3	0	3	0	0	1	2	0	0	3	2	1	2	0	3	1	2	1	0	0	2	0	0	0	0	0	0	1
B. longum subsp. infantis	Free-living	BIC1401212621b	GCA_000825085.1	1	0	0	0	1	0	0	0	1	0	1	8	0	0	0	2	3	0	3	0	0	1	2	0	0	3	2	1	2	0	3	1	2	1	0	0	2	0	0	0	0	0	0	1
B. longum subsp. infantis	Free-living	BIB1401242951	GCA_000825105.1	1	0	0	0	1	0	0	0	1	0	1	8	0	0	0	2	3	0	3	0	0	1	2	0	0	3	2	1	2	0	3	1	2	1	0	0	2	0	0	0	0	0	0	1
B. longum subsp. infantis	Free-living	BIB1401272845a	GCA_000825125.1	1	0	0	0	1	0	0	0	1	0	1	8	0	0	0	2	3	0	3	0	0	1	2	0	0	3	2	1	2	0	3	1	2	1	0	0	2	0	0	0	0	0	0	1
B. longum subsp. infantis	Free-living	BIB1401272845b	GCA_000825145.1	1	0	0	0	1	0	0	0	1	0	1	8	0	0	0	2	3	0	3	0	0	1	2	0	0	3	2	1	2	0	3	1	2	1	0	0	2	0	0	0	0	0	0	1
B. longum subsp. infantis	Frozen shrimp	S5	GCA_902167565.1	0	0	1	0	1	0	0	0	1	0	1	8	0	0	0	1	3	0	0	0	0	4	2	0	1	0	2	1	4	1	2	1	3	1	0	0	2	0	0	0	1	0	0	1
B. longum subsp. infantis	Frozen shrimp	S4	GCA_902167595.1	0	0	1	0	1	0	0	0	1	0	1	8	1	0	0	3	3	0	2	0	0	1	4	1	0	1	2	1	2	0	2	1	2	1	0	0	2	0	0	0	0	0	0	1
B. longum subsp. infantis	Frozen shrimp	3_mod	GCA_902167615.1	0	0	0	0	1	0	0	0	1	0	1	11	0	0	0	1	2	0	1	0	0	2	2	0	1	1	2	1	2	0	2	1	1	1	1	0	2	0	0	0	0	0	0	1
B. longum subsp. infantis	Sesame seeds	2_mod	GCA_902167555.1	1	0	0	0	1	0	0	0	1	0	1	9	1	0	0	3	2	0	0	0	0	3	1	0	1	3	2	1	3	1	2	2	2	1	0	0	2	0	0	0	0	0	0	1
B. longum subsp. infantis	Cumin seeds	S6	GCA_902167885.1	1	0	0	0	1	0	0	0	1	0	1	8	0	0	0	2	3	0	4	0	0	3	2	0	0	3	2	1	2	0	3	1	2	1	0	0	2	0	0	0	0	0	0	1
B. longum subsp. infantis		CECT 7210	GCA_001051015.2	0	1	0	0	1	1	1	0	1	2	1	9	0	0	0	1	1	0	2	0	1	0	5	1	3	1	0	2	2	0	2	12	2	5	1	0	2	0	0	0	1	0	0	0
B. longum subsp. infantis		IN-07	GCA_001686105.1	0	1	0	0	1	0	0	1	1	0	1	9	1	0	0	1	2	0	1	0	0	2	4	0	0	2	2	1	2	0	3	1	3	1	0	0	2	0	0	0	1	0	0	1
B. longum subsp. infantis		IN-F29	GCA_001686125.1	0	0	1	0	1	0	0	0	2	0	1	8	0	0	0	1	3	0	0	0	0	4	2	0	0	1	2	1	1	0	2	0	3	1	0	0	2	0	0	0	2	0	0	1
B. longum subsp. infantis		CECT 7210	GCA_002900845.1	0	1	0	0	1	1	1	0	1	2	1	9	0	0	0	1	1	0	2	0	1	0	5	1	3	1	0	2	2	0	2	12	2	5	1	0	2	0	0	0	1	0	0	0
B. longum subsp. infantis		NCTC13219	GCA_900445755.1	0	0	0	0	1	0	0	0	1	0	1	7	0	0	0	1	3	0	4	0	0	3	2	0	0	1	1	1	2	0	3	1	2	1	0	0	2	0	0	0	0	0	0	1
B. longum subsp. infantis		NCTC11817	GCA_900637215.1	1	0	0	0	1	0	0	0	1	0	1	8	0	0	0	2	3	0	4	0	0	3	2	0	0	3	2	1	2	0	3	1	2	1	0	0	2	0	0	0	0	0	0	1
B. longum subsp. infantis		BG463	GCA_902167775.1	1	0	1	0	1	0	0	0	1	0	1	8	0	0	0	2	2	0	1	0	0	1	3	0	0	1	2	1	2	0	2	1	2	1	0	0	2	0	0	0	1	0	0	1
B. longum subsp. infantis		Bg463	GCA_902167915.1	1	0	1	0	1	0	0	0	1	0	1	5	0	0	0	2	2	0	1	0	0	1	3	0	0	1	2	0	2	0	2	1	2	1	0	0	2	0	0	0	1	0	0	1
B. longum subsp. suis	Calf	VT155	SAMN17849156	0	1	0	0	1	0	0	0	1	1	1	8	0	0	0	1	2	0	2	0	1	0	4	1	0	1	0	0	2	2	2	1	2	1	0	0	2	0	0	0	1	0	0	1
B. longum subsp. suis	Calf	VT247	SAMN17849157	0	1	0	0	1	0	0	0	1	1	1	9	0	0	0	0	1	0	2	0	1	0	5	1	0	0	0	0	2	2	2	1	2	1	1	0	2	0	0	0	1	0	0	0
B. longum subsp. suis	Pig	SU851	GCA_016882605.1	0	1	0	0	1	0	0	0	1	1	1	8	0	0	0	1	1	0	2	0	1	0	5	1	0	1	1	0	1	2	2	6	2	2	1	0	2	0	0	0	1	0	0	1
B. longum subsp. suis	Pig	LMG 21814	GCA_000741625.1	0	1	0	0	1	0	0	0	1	1	1	8	0	0	0	1	1	0	1	0	1	0	5	1	0	1	1	0	1	2	2	7	2	2	1	0	2	0	0	0	1	0	0	1
B. longum subsp. suis	Pig	DSM 20211	GCA_000771285.1	0	0	0	0	1	1	1	0	1	1	1	10	0	0	0	1	1	0	1	0	0	1	3	1	1	1	1	0	1	2	3	12	2	3	1	0	2	0	1	0	1	0	0	1
B. moukalabense	Gorilla	GG01	GCA_005405645.1	1	0	0	0	0	0	0	0	1	1	0	15	0	0	0	5	0	1	2	2	1	1	15	1	3	1	0	0	4	0	4	11	3	2	2	0	2	2	0	0	0	0	1	0
B. moukalabense	Gorilla	GB01	GCA_005405665.1	1	0	0	0	0	0	0	0	1	1	0	15	0	0	0	5	0	1	2	2	1	1	15	4	0	1	0	0	4	0	4	11	3	2	2	0	2	2	0	0	0	0	1	0
B. moukalabense	Chimpanzee	CD14	GCA_005405785.1	1	0	0	0	0	0	1	0	1	2	0	15	0	1	0	5	0	0	2	2	1	1	14	1	4	1	0	0	4	0	4	10	3	2	2	0	2	2	0	0	0	0	1	0
B. moukalabense	Chimpanzee	CD16	GCA_005405805.1	1	0	0	0	0	0	0	0	1	1	0	15	0	0	0	5	0	1	1	2	1	1	13	1	3	1	0	0	4	0	4	8	4	2	2	0	2	2	0	0	0	0	1	0
B. moukalabense	Elephant	EB43	GCA_005405845.1	1	0	0	0	0	0	1	0	1	2	0	15	0	1	0	5	0	0	2	2	1	1	14	1	4	1	0	0	4	0	4	10	3	2	2	0	2	2	0	0	0	0	1	0
B. moukalabense	Elephant	EB44	GCA_005405865.1	1	0	0	0	0	0	0	0	1	1	0	15	0	0	0	5	0	1	1	2	1	1	13	1	3	1	0	0	4	0	4	8	4	2	2	0	2	2	0	0	0	0	1	0
B. adolescentis	Human	BBMN23	GCA_000817995.1	0	0	0	0	0	1	1	0	0	2	0	17	0	0	0	1	0	0	3	0	0	0	6	1	2	2	0	0	2	1	3	8	2	1	0	0	2	0	1	0	0	0	1	0
B. adolescentis	Human	IVS-1	GCA_000829865.1	2	0	0	0	0	1	0	0	0	1	0	7	0	0	0	4	0	1	1	1	0	0	5	1	1	1	0	1	2	0	2	7	2	1	0	0	2	0	1	0	0	0	1	0
B. adolescentis	Human	S150	GCA_001010915.1	1	0	0	0	0	1	0	0	0	2	0	14	0	0	0	3	0	0	3	0	0	0	5	1	2	1	0	0	4	0	3	7	1	1	0	0	2	0	1	0	0	0	1	0
B. adolescentis	Human	2789STDY5834850	GCA_001406215.1	1	0	0	0	0	1	0	0	0	1	0	17	0	0	0	3	0	1	1	0	0	0	6	1	1	2	0	1	2	1	4	7	2	1	0	0	2	0	1	0	0	0	1	0
B. adolescentis	Human	2789STDY5608824	GCA_001406455.1	1	0	0	0	0	1	0	0	0	2	0	15	0	0	0	3	0	0	2	0	0	0	6	1	3	1	0	1	4	1	4	7	2	1	0	0	2	0	1	0	0	0	1	1
B. adolescentis	Human	2789STDY5608862	GCA_001406735.1	2	0	0	0	0	1	0	0	0	1	0	15	0	0	0	4	0	0	2	1	0	0	6	1	1	2	0	0	2	1	4	8	3	1	0	0	2	0	1	0	0	0	1	0
B. adolescentis	Human	Km 4	GCA_001756865.1	1	0	0	0	0	1	0	0	0	1	0	15	0	0	0	3	0	0	2	0	0	0	5	1	2	1	0	0	2	0	4	8	2	1	0	0	2	0	1	0	0	0	1	0
B. adolescentis	Infant	1892B	GCA_002075965.1	1	0	0	0	0	1	0	0	0	1	0	17	0	0	0	3	0	0	2	0	0	0	6	1	2	2	0	0	3	0	4	7	2	1	0	0	2	0	1	0	0	0	1	0
B. adolescentis	Human	42B	GCA_002107925.1	1	0	0	0	0	1	0	0	0	1	0	16	0	0	0	3	0	0	3	0	0	0	6	1	1	1	0	1	3	0	4	7	1	1	0	0	2	0	1	0	0	0	1	0
B. adolescentis	Human	70B	GCA_002107955.1	1	0	0	0	0	1	0	0	0	2	0	14	0	0	0	3	0	0	1	0	0	0	6	3	1	1	0	1	4	1	4	9	2	1	0	0	2	0	1	0	0	0	1	0
B. adolescentis	Human	AL12-4	GCA_002107975.1	1	0	0	0	0	2	0	0	0	1	0	15	0	0	0	4	0	0	1	1	1	0	6	0	2	2	0	1	2	1	3	9	1	1	0	0	2	0	2	0	0	0	1	0
B. adolescentis	Human	LMG 10734	GCA_002107995.1	1	0	0	0	0	1	1	0	0	2	0	17	0	0	0	3	0	0	1	0	0	0	5	1	1	1	0	1	2	0	4	8	2	1	0	0	2	0	1	0	0	0	0	0
B. adolescentis	Human	487B	GCA_002108015.1	1	0	0	0	0	2	0	0	0	2	0	15	0	0	0	3	0	1	3	0	0	0	5	1	1	2	0	1	3	0	3	9	2	1	0	0	2	0	2	0	0	0	1	0
B. adolescentis	Human	703B	GCA_002108035.1	0	0	0	0	0	1	0	0	0	1	0	13	0	0	0	3	0	0	1	1	1	0	6	1	1	2	0	1	2	1	3	9	2	2	0	0	3	0	2	0	0	0	1	0
B. adolescentis	Human	BIO5485	GCA_013249115.1	2	0	0	0	0	1	0	0	0	1	0	10	0	0	0	3	0	0	1	1	0	0	5	1	1	2	0	1	2	1	3	6	2	2	0	0	2	0	1	0	0	0	0	0
B. adolescentis	Human	NCTC11814	GCA_900445615.1	2	0	0	0	0	1	0	0	0	1	0	14	0	0	0	3	0	0	1	1	1	0	6	1	1	2	0	2	2	1	4	7	2	2	0	0	2	0	1	0	0	0	0	0
B. adolescentis		ATCC 15703	GCA_000010425.1	2	0	0	0	0	1	0	0	0	1	0	13	0	0	0	3	0	0	1	1	1	0	6	1	1	2	0	1	2	1	3	7	2	2	0	0	2	0	1	0	0	0	0	0
B. adolescentis		L2-32	GCA_000154085.1	1	0	0	0	0	1	0	0	0	2	0	19	0	0	0	3	0	0	3	0	0	0	6	1	1	1	0	1	4	1	4	7	2	1	0	0	2	0	1	0	0	0	1	0
B. adolescentis		S3	GCA_000435235.1	0	0	0	0	0	0	1	0	0	2	0	15	0	0	0	3	0	0	0	0	0	0	6	1	1	1	0	1	2	1	4	7	3	1	0	0	2	0	0	0	0	0	1	0
B. adolescentis		22L	GCA_000737885.1	2	0	0	0	0	1	0	0	0	2	0	16	0	0	0	4	0	0	2	1	0	0	5	1	1	2	0	0	3	0	3	7	2	1	0	0	2	0	1	0	0	0	1	0
B. adolescentis		AD2-8	GCA_002108045.1	1	0	0	0	0	1	1	0	0	2	0	17	0	0	0	3	0	0	2	0	0	1	6	1	2	1	0	0	2	1	4	8	4	1	0	0	2	0	1	0	0	0	1	0
B. adolescentis		AL46-2	GCA_002108075.1	0	0	0	0	0	1	0	0	0	1	0	18	0	0	0	3	0	0	1	0	1	0	5	1	2	1	0	0	3	1	4	7	1	1	0	0	2	0	1	0	0	0	1	0
B. adolescentis		AL46-7	GCA_002108095.1	1	0	0	0	0	1	0	0	0	1	0	15	0	0	0	4	0	0	2	1	0	0	7	1	1	2	0	0	2	0	4	7	1	1	0	0	2	0	1	0	0	0	1	0
B. adolescentis		LMG 10733	GCA_002108135.1	2	0	0	0	0	1	0	0	0	1	0	13	0	0	0	3	0	0	1	1	1	0	6	1	1	2	0	1	2	1	4	6	2	2	0	0	2	0	1	0	0	0	0	0
B. adolescentis		LMG 11579	GCA_002108155.1	1	0	0	0	0	1	0	0	0	1	0	16	0	0	0	2	0	0	1	0	0	0	5	0	2	1	0	0	2	0	2	7	1	1	0	0	2	0	1	0	0	0	0	0
B. adolescentis		LMG 18897	GCA_002108165.1	1	0	0	0	0	1	0	0	0	1	0	17	0	0	0	2	0	1	1	0	0	0	6	1	2	1	0	0	2	1	3	7	3	1	0	0	2	0	1	0	0	0	1	0
B. adolescentis		S1-11	GCA_003030905.1	1	0	0	0	0	1	0	0	0	1	0	13	0	0	0	3	0	1	1	0	0	0	5	0	1	2	0	0	2	0	3	8	1	1	0	0	2	0	1	0	0	0	1	0
B. adolescentis		S6	GCA_003429385.1	1	0	0	0	0	1	0	0	0	1	0	16	0	0	0	3	0	0	1	0	0	0	4	1	2	2	0	0	2	1	2	7	1	1	0	0	2	0	1	0	0	0	1	0
B. adolescentis		TM06-4	GCA_003436185.1	0	0	0	0	0	1	1	0	0	2	0	16	0	0	0	3	0	0	1	0	0	0	5	1	0	2	0	0	2	0	2	9	2	1	0	0	2	0	1	0	0	0	1	0
B. adolescentis		TF06-2AC	GCA_003437735.1	0	0	0	0	0	1	0	0	0	1	0	16	0	0	0	3	0	0	1	0	0	0	5	0	1	2	0	0	2	1	3	9	2	2	0	0	2	0	1	0	0	0	1	0
B. adolescentis		TF06-29	GCA_003437755.1	0	0	0	0	0	1	0	0	0	1	0	16	0	0	0	3	0	0	1	0	0	0	5	0	1	2	0	0	2	1	3	9	2	2	0	0	2	0	1	0	0	0	1	0
B. adolescentis		TF06-10AC	GCA_003437775.1	0	0	0	0	0	1	0	0	0	1	0	16	0	0	0	3	0	0	1	0	0	0	5	0	1	2	0	0	2	1	3	9	2	2	0	0	2	0	1	0	0	0	1	0
B. adolescentis		AF28-4AC	GCA_003457765.1	0	0	0	0	0	1	1	0	0	2	0	17	0	0	0	2	0	0	2	0	0	0	5	1	1	2	0	0	2	0	2	9	2	1	0	0	2	0	1	0	0	0	0	0
B. adolescentis		AF21-27	GCA_003458805.1	0	0	0	0	0	1	0	0	0	1	0	16	0	0	0	3	0	0	1	0	0	0	5	1	1	2	0	0	3	0	2	7	1	1	0	0	2	0	1	0	0	0	1	0
B. adolescentis		OF04-5	GCA_003462885.1	0	0	0	0	0	1	1	0	0	2	0	17	0	0	0	2	0	0	2	0	0	0	5	1	1	2	0	0	2	0	2	9	2	1	0	0	2	0	1	0	0	0	0	0
B. adolescentis		OF04-9AC	GCA_003462895.1	0	0	0	0	0	1	1	0	0	2	0	17	0	0	0	2	0	0	2	0	0	0	5	1	1	2	0	0	2	0	2	9	2	1	0	0	2	0	1	0	0	0	0	0
B. adolescentis		AF15-3	GCA_003464325.1	0	0	0	0	1	1	1	0	1	2	0	16	0	0	0	2	0	1	2	0	0	0	5	1	3	2	0	0	2	3	2	9	3	1	0	0	2	0	1	0	1	0	1	0
B. adolescentis		AF14-56	GCA_003465205.1	0	0	0	0	0	1	0	0	0	1	0	17	0	0	0	2	0	0	3	0	0	0	5	1	1	2	0	0	3	0	2	7	1	1	0	0	2	0	1	0	0	0	1	0
B. adolescentis		TM06-51	GCA_003466335.1	0	0	0	0	0	1	1	0	0	2	0	17	0	0	0	3	0	0	2	0	0	0	5	1	0	2	0	0	2	1	2	11	2	1	0	0	2	0	1	0	0	0	1	0
B. adolescentis		AM41-17	GCA_003467335.1	1	0	0	0	0	1	1	0	0	2	0	16	0	0	0	2	0	0	1	1	0	0	5	1	1	2	0	0	2	0	2	8	1	1	0	0	2	0	1	0	0	0	1	0
B. adolescentis		AM36-3AC	GCA_003468385.1	0	0	0	0	0	1	1	0	0	2	0	16	0	0	0	2	0	1	1	0	0	0	5	1	2	2	0	0	2	1	2	9	1	1	0	0	2	0	1	0	0	0	1	0
B. adolescentis		AM34-11	GCA_003469145.1	0	0	0	0	0	1	1	0	0	2	0	17	0	0	0	2	0	0	1	0	0	0	5	1	1	3	0	0	2	1	2	9	2	1	0	0	2	0	1	0	0	0	1	0
B. adolescentis		AM14-37	GCA_003472095.1	2	0	0	0	0	1	1	0	0	2	0	17	0	0	0	3	0	0	3	1	0	0	5	1	1	2	0	0	2	0	2	8	1	1	0	0	2	0	1	0	0	0	1	0
B. adolescentis		AF45-19	GCA_003473345.1	0	0	0	0	0	0	0	0	0	0	0	7	0	0	0	2	0	0	3	0	0	0	2	0	1	0	0	0	0	0	4	4	0	1	0	0	1	0	1	0	0	0	0	0
B. adolescentis		P2P3	GCA_003856735.1	1	0	0	0	0	1	0	0	0	1	0	17	0	0	0	4	0	0	1	1	0	0	5	1	1	1	0	0	2	0	2	7	1	1	0	0	2	0	1	0	0	0	0	0
B. adolescentis		ca_0067	GCA_004167585.1	1	0	0	0	0	1	0	0	0	1	0	17	0	0	0	3	0	0	2	0	0	0	5	0	1	2	0	1	2	0	2	7	1	1	0	0	2	0	1	0	0	0	1	0
B. adolescentis		BIOML-A227	GCA_009075795.1	1	0	0	0	0	1	0	0	0	1	0	16	0	0	0	3	0	0	2	0	0	0	3	1	1	1	0	1	2	1	3	8	2	1	0	0	2	0	1	0	0	0	1	0
B. adolescentis		BIOML-A188	GCA_009075895.1	1	0	0	0	0	1	0	0	0	1	0	17	0	0	0	3	0	0	2	0	0	0	5	1	1	1	0	1	2	0	3	7	1	1	0	0	2	0	1	0	0	0	1	0
B. adolescentis		BIOML-A8	GCA_009095375.1	2	0	0	0	0	1	0	0	0	2	0	17	0	0	0	3	0	0	1	1	0	0	5	1	2	1	0	0	3	0	3	8	2	2	0	0	2	0	1	0	0	0	1	0
B. adolescentis		ZJ2	GCA_009832825.1	0	0	0	0	0	1	1	0	0	2	0	17	0	0	0	2	0	0	1	0	0	0	5	1	1	2	0	0	2	0	2	10	2	1	0	0	2	0	1	0	0	0	1	0
B. pseudocatenulatum	Human	IPLA36007	GCA_000708005.1	1	0	0	0	0	1	1	0	1	1	0	13	0	0	0	4	1	0	0	0	0	0	5	1	2	1	0	1	3	0	3	12	1	2	0	0	2	1	2	0	0	0	0	0
B. pseudocatenulatum	Human	2789STDY5834840	GCA_001405035.1	1	0	0	0	0	2	1	0	1	1	0	14	0	0	1	4	1	0	2	0	1	0	4	1	2	1	0	0	3	0	3	10	2	2	0	0	2	0	2	0	0	0	0	0
B. pseudocatenulatum	Human	S121.5	GCA_001576885.1	0	0	0	0	0	2	1	0	1	1	0	4	0	0	1	0	0	0	1	0	0	0	2	1	0	1	0	0	1	0	2	10	1	2	0	0	1	1	2	0	0	0	0	0
B. pseudocatenulatum	Human	1E	GCA_002271255.1	2	0	0	0	0	2	1	0	1	1	0	15	0	0	1	4	1	1	1	0	0	0	5	0	2	1	0	0	2	0	3	14	3	1	0	0	2	1	2	0	0	0	0	0
B. pseudocatenulatum	Human	TM10-1	GCA_003436025.1	0	0	0	0	0	1	1	0	1	1	0	14	0	0	1	4	1	0	0	0	0	0	5	0	2	3	0	0	3	0	3	14	2	2	0	0	2	1	1	0	0	0	0	1
B. pseudocatenulatum	Human	TM08-2	GCA_003436105.1	0	0	0	0	0	1	0	0	1	0	0	10	0	0	1	2	0	0	1	0	0	0	3	1	1	2	0	0	2	0	0	7	2	2	0	0	2	1	2	0	0	0	0	0
B. pseudocatenulatum	Human	TM07-3AT	GCA_003436315.1	0	0	0	0	0	2	1	0	1	1	0	14	0	0	1	3	1	0	1	0	0	0	5	1	2	1	0	0	2	0	3	14	2	2	0	0	2	1	2	0	0	0	0	0
B. pseudocatenulatum	Human	TF08-3AT	GCA_003436955.1	1	0	0	0	0	1	1	0	1	1	0	15	0	0	1	3	1	0	2	0	0	0	5	1	2	1	0	0	3	0	3	13	2	2	0	0	2	1	1	0	0	0	0	0
B. pseudocatenulatum	Human	TF07-45	GCA_003437075.1	0	0	0	0	0	1	1	0	1	1	0	15	0	0	1	3	1	0	2	0	0	0	5	0	2	1	0	0	2	0	2	9	1	2	0	0	2	1	2	0	0	0	0	0
B. pseudocatenulatum	Human	TF07-23	GCA_003437155.1	0	0	0	0	0	1	1	0	1	1	0	14	0	0	1	3	1	1	1	0	0	0	5	0	2	1	0	0	3	0	2	9	2	2	0	0	2	1	2	0	0	0	0	0
B. pseudocatenulatum	Human	TM05-11	GCA_003437435.1	0	0	0	0	0	1	1	0	1	1	0	14	0	0	1	3	0	0	3	0	0	0	5	0	2	1	0	0	2	0	3	14	2	2	0	0	2	1	1	0	0	0	0	0
B. pseudocatenulatum	Human	TF05-2AC	GCA_003437825.1	0	0	0	0	0	1	1	0	1	1	0	13	0	0	1	3	1	1	1	0	0	0	5	1	1	3	0	0	2	0	3	10	2	2	0	0	2	1	2	0	0	0	0	0
B. pseudocatenulatum	Human	TF05-19AC	GCA_003437835.1	0	0	0	0	0	1	1	0	1	2	0	10	0	0	1	4	1	0	2	0	0	0	5	0	1	4	0	0	4	0	3	9	2	2	0	0	2	1	2	0	0	0	0	0
B. pseudocatenulatum	Human	OM10-8	GCA_003438015.1	0	0	0	0	0	0	0	0	1	0	0	8	0	0	1	5	0	0	0	0	0	0	3	0	2	1	0	0	2	0	2	9	2	1	0	0	2	0	1	0	0	0	0	0
B. pseudocatenulatum	Human	OM05-2	GCA_003438405.1	0	0	0	0	0	1	1	0	1	1	0	16	0	0	1	3	1	0	2	0	0	0	5	0	3	3	0	0	2	0	3	10	2	2	0	0	2	1	2	0	0	0	0	0
B. pseudocatenulatum	Human	OF05-12	GCA_003439655.1	0	0	0	0	0	1	1	0	1	1	0	13	0	0	1	3	1	0	2	0	0	0	5	1	2	3	0	0	2	0	3	10	2	2	0	0	2	1	2	0	0	0	0	0
B. pseudocatenulatum	Human	AF26-1	GCA_003458965.1	0	0	0	0	0	1	1	0	1	1	0	13	0	0	1	3	1	0	2	0	0	0	5	0	1	3	0	0	2	0	3	10	2	2	0	0	2	1	1	0	0	0	0	0
B. pseudocatenulatum	Human	AF20-20AC	GCA_003459475.1	0	0	0	0	0	2	1	0	1	1	0	12	0	0	1	3	1	0	1	0	0	0	5	1	2	1	0	0	2	0	3	11	2	3	0	0	2	1	2	0	0	0	0	0
B. pseudocatenulatum	Human	AF18-2AC	GCA_003459865.1	0	0	0	0	0	1	0	0	1	0	0	7	0	0	1	2	0	0	2	0	0	0	4	0	2	2	0	0	2	0	1	5	1	2	0	0	2	0	1	0	0	0	0	0
B. pseudocatenulatum	Human	AF17-20AC	GCA_003460425.1	0	0	0	0	0	2	1	0	1	1	0	15	0	0	1	4	1	0	1	0	0	0	5	1	2	1	0	0	2	1	3	10	3	3	0	0	2	1	2	0	0	0	0	1
B. pseudocatenulatum	Human	OF01-21AC	GCA_003463265.1	0	0	0	0	0	1	0	0	0	0	0	9	0	0	1	2	0	0	1	0	0	0	5	1	2	1	0	0	1	0	2	7	2	3	0	0	0	0	2	0	0	0	0	0
B. pseudocatenulatum	Human	OF01-8	GCA_003463425.1	0	0	0	0	0	2	1	0	1	1	0	12	0	0	1	3	1	0	2	0	0	0	5	1	2	1	0	0	2	0	3	11	2	3	0	0	2	1	2	0	0	0	0	0
B. pseudocatenulatum	Human	OF01-2	GCA_003463455.1	0	0	0	0	0	2	1	0	1	1	0	12	0	0	1	3	1	0	1	0	0	0	5	1	2	1	0	0	2	0	3	11	2	3	0	0	2	1	2	0	0	0	0	0
B. pseudocatenulatum	Human	OF01-12	GCA_003463505.1	0	0	0	0	0	2	1	0	1	1	0	12	0	0	1	3	1	0	2	0	0	0	5	1	2	1	0	0	2	0	3	11	2	3	0	0	2	1	2	0	0	0	0	0
B. pseudocatenulatum	Human	CF01-1	GCA_003463615.1	0	0	0	0	0	0	0	0	1	0	0	5	0	0	1	5	0	0	2	0	0	0	2	0	1	3	0	0	2	0	1	10	2	2	0	0	2	0	1	0	0	0	0	0
B. pseudocatenulatum	Human	AF12-8LB-d	GCA_003464925.1	0	0	0	0	0	2	1	0	1	1	0	10	0	0	1	4	1	0	1	0	0	0	5	1	2	2	0	0	2	0	3	11	2	2	0	0	2	1	2	0	0	0	0	0
B. pseudocatenulatum	Human	AF12-10-6.0	GCA_003465065.1	0	0	0	0	0	2	1	0	1	1	0	10	0	0	1	4	1	0	1	0	0	0	5	1	2	2	0	0	2	0	3	11	2	2	0	0	2	1	2	0	0	0	0	0
B. pseudocatenulatum	Human	AF11-18	GCA_003465135.1	1	0	0	0	0	2	1	0	1	1	0	14	0	0	1	4	1	0	1	0	0	0	5	1	2	3	0	0	4	0	3	10	2	2	0	0	2	1	1	0	0	0	0	0
B. pseudocatenulatum	Human	AF12-8A-LB	GCA_003465385.1	0	0	0	0	0	2	1	0	1	1	0	10	0	0	1	4	1	0	1	0	0	0	5	1	2	2	0	0	2	0	3	11	2	2	0	0	2	1	2	0	0	0	0	0
B. pseudocatenulatum	Human	AF03-28	GCA_003465775.1	0	0	0	0	0	1	1	0	1	1	0	14	0	0	1	3	1	1	1	0	0	0	5	0	3	1	0	0	2	0	3	14	2	2	0	0	2	1	1	0	0	0	0	0
B. pseudocatenulatum	Human	AF02-36-1	GCA_003466105.1	0	0	0	0	0	1	1	0	1	1	0	13	0	0	1	3	1	0	1	0	0	0	5	0	3	3	0	0	2	0	3	10	2	2	0	0	2	1	2	0	0	0	0	0
B. pseudocatenulatum	Human	AM43-10	GCA_003467065.1	0	0	0	0	0	1	1	0	1	1	0	12	0	0	1	3	1	1	1	0	0	0	5	0	2	3	0	0	2	0	3	10	2	2	0	0	2	1	2	0	0	0	0	0
B. pseudocatenulatum	Human	AM11-10	GCA_003472415.1	0	0	0	0	0	2	1	0	1	1	0	13	0	0	1	3	1	0	1	0	0	0	5	0	2	3	0	0	2	0	3	10	3	2	0	0	2	1	2	0	0	0	0	0
B. pseudocatenulatum	Human	AF45-10BH	GCA_003474015.1	0	0	0	0	0	1	1	0	1	0	0	8	0	0	1	4	1	0	1	0	0	0	2	1	0	0	0	0	2	0	3	7	2	3	0	0	2	0	1	0	0	0	0	1
B. pseudocatenulatum	Human	AF41-3MH	GCA_003474525.1	0	0	0	0	0	0	0	0	1	1	0	5	0	0	1	4	0	0	0	0	0	0	2	1	2	2	0	0	3	0	0	5	1	2	0	0	2	1	2	0	0	0	0	0
B. pseudocatenulatum	Human	AF36-12AT	GCA_003474835.1	0	0	0	0	0	2	1	0	1	1	0	13	0	0	1	3	1	0	3	0	0	0	5	1	2	1	0	0	2	0	3	10	2	2	0	0	2	1	2	0	0	0	0	0
B. pseudocatenulatum	Human	S12	GCA_003952825.1	1	0	0	0	0	1	1	0	1	2	0	11	0	0	1	4	1	0	0	0	0	0	5	1	1	2	0	0	4	0	3	9	2	3	0	0	2	1	1	0	0	0	0	0
B. pseudocatenulatum	Human	ca_0067	GCA_004167565.1	0	0	0	0	0	1	1	0	1	1	0	11	0	0	0	3	1	0	1	0	0	0	5	0	1	1	0	0	2	0	3	9	2	2	0	0	2	1	1	0	0	0	0	0
B. pseudocatenulatum	Human	NBRC 113353	GCA_006828885.1	0	0	0	0	0	1	1	0	1	1	0	15	0	0	1	3	1	1	1	0	0	0	5	0	2	3	0	0	3	0	3	10	3	2	0	0	2	1	1	0	0	0	0	0
B. pseudocatenulatum	Human	BIOML-A193	GCA_009876975.1	2	0	0	0	0	1	1	0	0	1	0	12	0	0	1	3	1	0	1	0	0	0	5	0	3	1	0	0	2	0	3	13	2	2	0	0	2	1	1	0	0	0	0	0
B. pseudocatenulatum	Human	BIOML-A104	GCA_009882125.1	1	0	0	0	0	2	1	0	1	1	0	15	0	0	0	3	1	0	1	0	0	0	5	1	2	1	0	0	2	0	3	14	1	3	0	0	2	0	2	0	0	0	0	0
B. pseudocatenulatum	Human	BIOML-A1	GCA_009883385.1	0	0	0	0	0	1	1	0	1	1	0	14	0	0	0	3	1	0	1	0	0	0	5	1	2	1	0	0	3	0	3	10	2	2	0	0	2	0	1	0	0	0	0	0
B. pseudocatenulatum	Human	Bif4	GCA_011008535.1	0	0	0	0	0	2	1	0	1	1	0	11	0	0	1	3	1	1	1	0	0	0	5	0	2	1	0	0	2	0	3	10	3	1	0	0	2	1	2	0	0	0	0	0
B. pseudocatenulatum	Infant	LMG 10505	GCA_000741685.1	0	0	0	0	0	2	1	0	0	1	0	16	0	0	1	4	1	1	1	0	0	0	5	1	2	1	0	0	2	0	3	15	2	3	0	0	2	0	2	0	0	0	0	1
B. pseudocatenulatum	Human Milk	1896B	GCA_002075945.1	0	0	0	0	0	1	1	0	1	2	0	17	0	0	1	4	1	0	1	0	1	0	5	1	1	1	0	0	4	0	3	13	2	3	0	0	2	0	1	0	0	0	0	1
B. pseudocatenulatum		DSM 20438	GCA_000173435.1	0	0	0	0	0	2	1	0	0	1	0	16	0	0	1	4	1	1	2	0	0	0	5	1	2	1	0	0	2	0	3	15	2	3	0	0	2	0	2	0	0	0	0	1
B. pseudocatenulatum		JCM 1200	GCA_001025215.1	0	0	0	0	0	2	1	0	0	1	0	17	0	0	1	4	1	1	1	0	0	0	5	1	2	1	0	0	3	0	3	15	2	3	0	0	2	0	2	0	0	0	0	1

## Sheet: animalis_lactis
Genome Name	Host	Strain	Accesssion	GH1	GH10	GH112	GH127	GH13	GH136	GH2	GH20	GH23	GH25	GH26	GH27	GH30	GH31	GH32	GH36	GH38	GH42	GH43	GH49	GH5	GH51	GH77	GH95
B. animalis subsp. animalis	Human	RH	GCF_000695895.1	1	0	0	1	12	2	2	0	0	2	0	3	2	0	1	0	0	2	3	0	1	1	2	0
B. animalis subsp. animalis	Human	A6	GCF_000817045.1	1	0	0	1	13	0	2	0	0	2	0	3	2	0	1	2	0	2	3	0	1	1	2	0
B. animalis subsp. animalis	Human	TF04-14	GCF_003438565.1	1	0	0	1	12	0	2	0	0	2	0	3	2	0	1	2	0	2	3	0	1	1	2	0
B. animalis subsp. animalis	Human	OM05-7AA	GCF_003438945.1	1	0	0	1	12	0	2	0	0	2	0	3	2	0	1	2	0	2	3	0	1	1	2	0
B. animalis subsp. animalis	Human	S1	GCF_004135895.1	1	0	0	1	12	0	2	0	0	2	0	3	2	0	1	2	0	2	3	0	1	1	2	0
B. animalis subsp. animalis	Human	co_0103	GCF_004167905.1	1	0	0	1	12	0	2	0	0	2	0	3	2	0	1	2	0	2	3	0	1	1	2	0
B. animalis subsp. animalis	Human	BSD2780061688st1_E5	GCF_005844245.1	1	0	0	1	12	0	2	0	0	2	0	3	2	0	1	2	0	2	3	0	1	1	2	0
B. animalis subsp. animalis	Human	J063	GCF_006538245.1	1	0	0	1	12	0	2	0	0	2	0	3	2	0	1	2	0	2	3	0	1	1	2	0
B. animalis subsp. animalis	Human	J218	GCF_006538265.1	1	0	0	1	12	0	2	0	0	2	0	3	2	0	1	2	0	2	3	0	1	1	2	0
B. animalis subsp. animalis	Human	J231	GCF_006538285.1	1	0	0	1	12	0	2	0	0	2	0	3	2	0	1	2	0	2	3	0	1	1	2	0
B. animalis subsp. animalis	Human	B06	GCF_008041995.1	1	0	0	1	13	0	2	0	0	2	0	3	2	0	1	2	0	2	3	0	1	1	2	0
B. animalis subsp. animalis	Human	BIOML-A2	GCF_009075805.1	1	0	0	1	12	0	2	0	0	2	0	3	2	0	1	2	0	2	3	0	1	1	2	0
B. animalis subsp. animalis	Human	BIOML-A3	GCF_009075825.1	1	0	0	1	12	0	2	0	0	2	0	3	2	0	1	2	0	2	3	0	1	1	2	0
B. animalis subsp. animalis	Human	BIOML-A1	GCF_009077835.1	1	0	0	1	12	0	2	0	0	2	0	3	2	0	1	2	0	2	3	0	1	1	2	0
B. animalis subsp. animalis	Human	MGYG-HGUT-02459	GCF_902387355.1	1	0	0	1	13	0	2	0	0	2	0	3	2	0	1	2	0	2	3	0	1	1	2	0
B. animalis subsp. animalis	Human	CNCM I-4602	GCF_003671995.1	1	0	0	0	11	0	2	0	0	1	0	2	1	0	1	2	0	0	3	0	1	1	2	0
B. animalis subsp. animalis	Human	IM386	GCF_001039715.1	1	0	0	0	11	0	2	0	0	1	0	2	1	0	1	2	0	0	3	0	1	1	2	0
B. animalis subsp. animalis	Blood	Bifido_08	GCF_900157045.1	1	0	0	1	12	0	2	0	0	2	0	3	2	0	1	2	0	2	3	0	1	1	2	0
B. animalis subsp. animalis	Blood	Bifido_11	GCF_900157135.1	1	0	0	1	12	0	2	0	0	2	0	3	2	0	1	2	0	2	3	0	1	1	2	0
B. animalis subsp. animalis	Commercial dietary supplements	BL3	GCF_002220485.1	1	0	0	1	13	0	2	0	0	2	0	3	2	0	1	2	0	2	3	0	1	1	2	0
B. animalis subsp. animalis	Commercial dietary supplements	DS15_2	GCF_003094875.1	1	0	0	1	12	0	2	0	0	2	0	3	2	0	1	2	0	2	3	0	1	1	2	0
B. animalis subsp. animalis	Commercial dietary supplements	DS11_2	GCF_003094895.1	1	0	0	1	12	0	2	0	0	2	0	3	2	0	1	2	0	2	3	0	1	1	2	0
B. animalis subsp. animalis	Commercial dietary supplements	DS20_2	GCF_003095055.1	1	0	0	1	12	0	2	0	0	2	0	3	2	0	1	2	0	2	3	0	1	1	2	0
B. animalis subsp. animalis	Commercial dietary supplements	DS2_2	GCF_003095075.1	1	0	0	1	12	0	2	0	0	2	0	3	2	0	1	2	0	2	3	0	1	1	2	0
B. animalis subsp. animalis	Commercial dietary supplements	DS1_2	GCF_003095115.1	1	0	0	1	12	0	2	0	0	2	0	3	2	0	1	2	0	2	3	0	1	1	2	0
B. animalis subsp. animalis	Dog	2006B	GCF_004154625.1	1	0	0	1	12	0	3	0	0	1	1	3	2	1	1	3	0	3	3	0	2	1	2	0
B. animalis subsp. animalis	Pig	MCC 1489	GCF_001263835.1	1	0	0	0	9	0	2	0	0	1	0	1	1	0	1	2	0	0	3	0	1	1	2	0
B. animalis subsp. animalis	Rodent	LMG 10508	GCF_000741485.1	1	0	0	0	10	0	2	0	0	1	0	2	1	0	1	2	0	0	3	0	1	1	2	0
B. animalis subsp. animalis	Rodent	YL2_1	GCF_001688645.2	1	0	0	1	10	0	2	0	1	2	0	2	1	0	1	2	0	2	3	0	1	1	2	0
B. animalis subsp. animalis	Rodent	YL2_2	GCF_002221565.2	1	0	0	1	11	0	2	0	1	2	0	2	1	0	1	2	0	2	3	0	1	1	2	0
B. animalis subsp. animalis	Rodent	ATCC 27672	GCF_001264055.1	1	0	1	0	9	1	3	0	0	2	1	1	1	0	1	3	0	2	4	0	1	1	2	0
B. animalis subsp. animalis	Rodent	MCC 0483	GCF_001263945.1	1	0	1	0	9	1	2	0	0	2	1	0	1	0	1	2	0	2	3	0	1	1	2	0
B. animalis subsp. animalis	Rodent	MCC 0499	GCF_001263865.1	1	0	1	0	9	1	2	0	0	4	0	1	1	0	1	2	0	0	2	0	1	1	2	0
B. animalis subsp. animalis		Probio-M8	GCF_011770105.1	1	0	0	1	13	0	2	0	0	2	0	3	2	0	1	2	0	2	3	0	1	1	2	0
B. animalis subsp. animalis		ATCC 25527	GCF_000260715.1	1	0	0	0	11	0	2	0	0	1	0	2	1	0	1	2	0	0	3	1	1	1	2	1
B. animalis subsp. lactis	Human	MN-Gup	GCF_009834975.1	1	0	0	1	12	0	2	0	0	2	0	3	2	0	1	2	0	2	3	0	1	1	2	0
B. animalis subsp. lactis	Human	KLDS2.0603	GCA_000816205.1	1	0	0	1	12	0	2	0	0	2	0	3	2	0	1	2	0	2	3	0	1	1	2	0
B. animalis subsp. lactis	Human	646	GCA_001892925.1	1	0	0	1	12	0	2	0	0	2	0	3	2	0	1	2	0	2	3	0	1	1	2	0
B. animalis subsp. lactis	Human	S7	GCA_003390755.1	1	0	0	1	13	0	2	0	0	2	0	3	2	0	1	2	0	2	3	0	1	1	2	0
B. animalis subsp. lactis	Infant	BF052	GCA_000818055.1	1	0	0	1	12	0	2	0	0	2	0	3	2	0	1	2	0	2	3	0	1	1	2	0
B. animalis subsp. lactis	Infant	IDCC4301	GCA_003428375.1	1	0	0	1	13	0	2	0	0	2	0	3	2	0	1	2	0	2	3	0	1	1	2	0
B. animalis subsp. lactis	Human Milk	BIO5764	GCF_008868455.1	1	0	0	1	12	0	1	0	0	2	0	3	2	0	1	2	0	2	3	0	1	1	2	0
B. animalis subsp. lactis	Food product - supplement	LMG P-17502_2	GCF_002914895.1	1	0	0	1	12	0	2	0	0	2	0	3	2	0	1	2	0	2	3	0	1	1	2	0
B. animalis subsp. lactis	Commercial dietary supplements	DS27_2	GCF_003094775.1	1	0	0	1	12	0	2	0	0	2	0	3	2	0	1	2	0	2	3	0	1	1	2	0
B. animalis subsp. lactis	Commercial dietary supplements	DS24_2	GCF_003094815.1	1	0	0	1	12	0	2	0	0	2	0	3	2	0	1	2	0	2	3	0	1	1	2	0
B. animalis subsp. lactis	Commercial dietary supplements	DS23_2	GCA_003094835.1	1	0	0	1	11	0	2	0	0	2	0	3	2	0	1	2	0	2	3	0	1	1	2	0
B. animalis subsp. lactis	Cultured Food	CF3_2	GCA_003094915.1	1	0	0	1	12	0	1	0	0	1	0	3	2	0	1	2	0	2	3	0	1	1	2	0
B. animalis subsp. lactis	Food product - supplement	LMG P-17502_1	GCA_002914815.1	1	0	0	1	12	0	2	0	0	2	0	3	2	0	1	2	0	2	3	0	1	1	2	0
B. animalis subsp. lactis	Food product - supplement	LMG P-17502_2	GCA_002914895.1	1	0	0	1	13	0	2	0	0	2	0	3	2	0	1	2	0	2	3	0	1	1	2	0
B. animalis subsp. lactis	Commercial dietary supplements	DS27_2	GCA_003094775.1	1	0	0	1	12	0	2	0	0	2	0	3	2	0	1	2	0	2	3	0	1	1	2	0
B. animalis subsp. lactis	Commercial dietary supplements	DS24_2	GCA_003094815.1	1	0	0	1	12	0	2	0	0	2	0	3	2	0	1	2	0	2	3	0	1	1	2	0
B. animalis subsp. lactis	Commercial dietary supplements	DS28_2	GCA_003095015.1	1	0	0	1	12	0	2	0	0	2	0	3	2	0	1	2	0	2	3	0	1	1	2	0
B. animalis subsp. lactis	Microbial food product	HN019	GCA_003606305.1	1	0	0	1	13	0	2	0	0	2	0	3	2	0	1	2	0	2	3	0	1	1	2	0
B. animalis subsp. lactis	Fermented food	UBBLa 70	GCA_003970855.1	1	0	0	1	12	0	2	0	0	2	0	3	2	0	1	2	0	2	3	0	1	1	2	0
B. animalis subsp. lactis	Dog	2011B	GCA_004154455.1	1	0	1	0	11	1	3	1	0	2	1	3	1	0	1	3	2	2	3	0	3	1	2	0
B. animalis subsp. lactis	Dog	2007B	GCA_004154645.1	1	0	1	1	12	1	2	1	0	1	0	3	0	0	1	2	2	2	3	0	2	1	2	0
B. animalis subsp. lactis	Dog	1821B	GCA_004154435.1	1	0	0	1	12	0	2	0	0	2	0	3	2	0	1	2	0	2	3	0	1	1	2	0
B. animalis subsp. lactis	Pig	1528B	GCA_004154555.1	1	1	0	1	12	0	3	0	0	3	1	2	1	0	1	3	0	2	3	0	2	1	2	0
B. animalis subsp. lactis	Chimpanzee	1869B	GCA_004154445.1	1	0	0	1	12	0	2	0	0	2	0	3	2	0	1	2	0	2	3	0	1	1	2	0
B. animalis subsp. lactis	Chimpanzee	1813B	GCA_004154525.1	1	0	0	1	12	0	2	0	0	2	0	3	2	0	1	2	0	2	3	0	1	1	2	0
B. animalis subsp. lactis	Chimpanzee	1843B	GCA_004154475.1	1	0	0	1	12	0	2	0	0	2	0	3	2	0	1	2	0	2	3	0	1	1	2	0
B. animalis subsp. lactis	Macaque	1802B	GCA_004154655.1	1	0	0	1	12	0	2	0	0	2	0	3	2	0	1	2	0	2	3	0	1	1	2	0
B. animalis subsp. lactis	Vervet monkey	1811B	GCA_004154535.1	1	0	0	1	12	0	2	0	0	2	0	3	2	0	1	2	0	2	3	0	1	1	2	0
B. animalis subsp. lactis	Vervet monkey	1808B	GCA_004154545.1	1	0	0	1	12	0	2	0	0	2	0	3	2	0	1	2	0	2	3	0	1	1	2	0
B. animalis subsp. lactis	Pheasant	1316B	GCA_004154565.1	1	0	0	1	12	0	2	0	0	2	0	3	2	0	1	2	0	2	3	0	1	1	2	0
B. animalis subsp. lactis	Rabbit	ATCC 27674	GCA_001263985.1	1	0	0	1	12	0	2	0	0	2	0	3	2	0	1	2	0	2	3	0	1	1	2	0
B. animalis subsp. lactis	Rabbit	1395B	GCA_004154695.1	1	0	0	1	12	0	2	0	0	2	0	3	2	0	1	2	0	2	3	0	1	1	2	0
B. animalis subsp. lactis	Chicken	ATCC 27536	GCA_001263975.1	1	0	0	1	12	0	2	0	0	2	0	3	2	0	1	2	0	2	3	0	1	1	2	0
B. animalis subsp. lactis	Sewage	ATCC 27673	GCA_001264015.1	1	1	0	1	12	0	3	0	0	1	0	2	1	0	1	2	0	1	3	0	2	1	2	0
B. animalis subsp. lactis		BM 25	GCA_002803775.1	2	0	0	1	12	0	2	0	0	2	0	3	2	0	1	3	0	2	3	0	1	1	2	0
B. animalis subsp. lactis		2010B	GCA_004154425.1	1	0	1	1	12	0	1	0	0	2	0	1	4	0	1	2	2	2	3	0	2	1	2	0
B. animalis subsp. lactis		BB-12	GCA_000025245.1	1	0	0	1	13	0	2	0	0	2	0	3	2	0	1	2	0	2	3	0	1	1	2	0
B. animalis subsp. lactis		ATCC 27673	GCA_000471945.1	1	1	0	1	12	0	3	0	0	1	0	2	1	0	1	2	0	1	3	0	2	1	2	0
B. animalis subsp. lactis		AD011	GCA_000021425.1	1	0	0	1	13	0	2	0	0	2	0	3	2	0	1	2	0	2	3	0	1	1	2	0
B. animalis subsp. lactis		Bl-04; ATCC SD5219	GCA_000022705.1	1	0	0	1	12	0	2	0	0	2	0	3	2	0	1	2	0	2	3	0	1	1	2	0
B. animalis subsp. lactis		DSM 10140	GCA_000022965.1	1	0	0	1	12	0	2	0	0	2	0	3	2	0	1	2	0	2	3	0	1	1	2	0
B. animalis subsp. lactis		V9	GCA_000092765.1	1	0	0	1	13	0	2	0	0	2	0	3	2	0	1	2	0	2	3	0	1	1	2	0
B. animalis subsp. lactis		HN019	GCA_000172535.1	1	0	0	1	12	0	2	0	0	2	0	3	2	0	1	2	0	2	3	0	1	1	2	0
B. animalis subsp. lactis		CNCM I-2494	GCA_000220885.1	1	0	0	1	13	0	2	0	0	2	0	3	2	0	1	2	0	2	3	0	1	1	2	0
B. animalis subsp. lactis		BLC1	GCA_000224965.2	1	0	0	1	12	0	2	0	0	2	0	3	2	0	1	2	0	2	3	0	1	1	2	0
B. animalis subsp. lactis		BS 01	GCA_000240765.1	1	0	0	1	13	0	2	0	0	2	0	3	2	0	1	2	0	2	3	0	1	1	2	0
B. animalis subsp. lactis		B420	GCA_000277325.1	1	0	0	1	12	0	2	0	0	2	0	3	2	0	1	2	0	2	3	0	1	1	2	0
B. animalis subsp. lactis		Bi-07	GCA_000277345.1	1	0	0	1	12	0	2	0	0	2	0	3	2	0	1	2	0	2	3	0	1	1	2	0
B. animalis subsp. lactis		Bl12	GCA_000414215.1	1	0	0	1	12	0	2	0	0	2	0	3	2	0	1	2	0	2	3	0	1	1	2	0
B. animalis subsp. lactis		CECT 8145	GCA_000612705.1	1	0	0	1	12	0	2	0	0	2	0	3	2	0	1	2	0	2	3	0	1	1	2	0
Upper CI				1.03516	0.0753308	0.126163	0.960878	12.093	0.150657	2.10548	0.056418	0.056418	2.00703	0.109876	2.89208	1.93973	0.0351601	1	2.10548	0.150662	1.96476	3.03328	0.0351601	1.16568	1	2	0.0351601
Lower CI				0.988369	-0.00474261	0.0150131	0.827357	11.7187	0.0140487	1.96511	-0.00935916	-0.00935916	1.82827	0.00777056	2.63733	1.73085	-0.0116307	1	1.96511	-0.00948521	1.72936	2.96672	-0.0116307	1.02255	1	2	-0.0116307
Mean				1.01176	0.0352941	0.0705882	0.894118	11.9059	0.0823529	2.03529	0.0235294	0.0235294	1.91765	0.0588235	2.76471	1.83529	0.0117647	1	2.03529	0.0705882	1.84706	3	0.0117647	1.09412	1	2	0.0117647

## Sheet:  pseudolongum_globosum
Genome Name	Host	Strain	Accesssion	GH1	GH109	GH112	GH127	GH13	GH136	GH140	GH163	GH2	GH20	GH23	GH25	GH26	GH27	GH29	GH3	GH30	GH31	GH32	GH33	GH36	GH38	GH42	GH43	GH49	GH5	GH51	GH73	GH77	GH94
B. pseudolongum subsp. globosum	Alpaca	1655B	GCA_004156195.1	0	1	0	0	17	0	0	0	2	0	0	1	0	0	0	1	1	0	1	0	2	0	0	3	0	0	1	0	2	0
B. pseudolongum subsp. globosum	Bear	1744B	GCA_002846675.1	0	1	0	0	17	0	0	0	2	0	1	1	0	0	0	1	1	0	1	0	2	0	0	3	0	0	1	0	2	0
B. pseudolongum subsp. globosum	Bear	2023B	GCA_004155635.1	2	1	1	0	17	1	0	0	3	0	0	1	0	0	1	3	1	2	1	0	3	0	1	3	0	0	1	0	2	1
B. pseudolongum subsp. globosum	Bovine	LMG 11569	GCA_000741295.1	0	1	0	0	17	0	0	0	2	0	0	1	0	0	0	2	1	0	1	0	1	0	0	3	0	0	0	0	2	0
B. pseudolongum subsp. globosum	Calf	2004B	GCA_004155115.1	0	1	0	0	16	0	0	0	2	0	0	1	0	0	0	2	1	0	1	0	2	0	0	3	0	0	0	0	2	0
B. pseudolongum subsp. globosum	Calf	S102017	GCA_004155405.1	0	1	0	0	15	0	0	0	2	0	0	1	0	0	0	2	1	0	1	0	1	0	0	3	0	0	0	0	2	0
B. pseudolongum subsp. globosum	Calf	S102015	GCA_004155425.1	0	1	0	0	15	0	0	0	2	0	0	1	0	0	0	2	1	0	1	0	2	0	0	3	0	0	0	0	2	0
B. pseudolongum subsp. globosum	Goat	S22511	GCA_004155435.1	0	1	0	0	17	0	1	0	2	0	0	1	0	0	0	1	1	0	1	0	2	0	0	7	0	0	1	0	2	0
B. pseudolongum subsp. globosum	Goat	S22506	GCA_004155325.1	0	1	0	0	16	0	0	0	2	0	0	0	0	0	0	2	1	0	1	0	1	0	0	3	0	0	0	0	2	0
B. pseudolongum subsp. globosum	Goat	S112206	GCA_004155855.1	0	1	0	0	17	0	0	0	2	0	0	1	0	0	0	2	1	0	1	0	2	0	0	3	0	0	0	0	2	0
B. pseudolongum subsp. globosum	Goat	1780B	GCA_004168525.1	0	1	0	0	16	0	0	0	2	0	0	1	0	0	0	1	1	0	1	0	2	0	0	3	0	0	1	0	2	0
B. pseudolongum subsp. globosum	Sheep	DSM 20092	GCA_002706665.1	0	0	0	0	17	0	0	0	2	0	0	1	0	0	0	2	1	0	1	0	1	0	0	3	0	0	0	0	2	0
B. pseudolongum subsp. globosum	Sheep	2083B	GCA_004155045.1	0	1	0	0	17	0	1	0	2	0	0	2	0	0	0	2	1	0	1	0	2	0	0	7	0	0	1	0	2	0
B. pseudolongum subsp. globosum	Sheep	2019B	GCA_004155095.1	1	1	0	0	15	0	0	0	3	0	0	2	0	0	0	2	1	0	1	0	2	0	0	3	0	0	1	0	2	1
B. pseudolongum subsp. globosum	Camel	1616B	GCA_004156145.1	1	1	0	1	16	0	0	0	3	0	0	2	0	0	1	2	1	2	1	0	2	0	1	3	0	0	1	0	2	1
B. pseudolongum subsp. globosum	llama	1619B	GCA_002846685.1	0	1	0	0	17	0	0	0	2	0	1	1	0	0	0	1	1	0	1	0	1	0	0	3	0	0	1	0	2	1
B. pseudolongum subsp. globosum	Capybara	2032B	GCA_004155615.1	1	1	0	0	17	0	1	0	3	0	0	1	0	0	1	3	1	3	1	0	3	0	2	7	1	0	1	0	2	1
B. pseudolongum subsp. globosum	Giraffe	1747B	GCA_002846835.1	1	1	0	1	17	0	1	0	3	0	0	3	0	0	1	3	1	2	1	0	3	0	2	7	0	0	1	0	2	1
B. pseudolongum subsp. globosum	Wallaby	1734B	GCA_002846845.1	2	1	1	0	17	1	1	0	3	0	0	2	0	0	0	2	1	0	1	0	3	0	0	7	0	0	1	0	2	1
B. pseudolongum subsp. globosum	Hippopotamus	1691B	GCA_002846875.1	0	1	0	0	18	0	0	0	2	0	1	1	0	0	0	1	1	0	1	0	2	0	0	3	0	0	1	0	2	0
B. pseudolongum subsp. globosum	Hippopotamus	1678B	GCA_004155155.1	0	1	0	0	17	0	0	0	2	0	0	1	0	0	0	1	1	0	1	0	2	0	0	3	0	0	1	0	2	0
B. pseudolongum subsp. globosum	Hippopotamus	2029B	GCA_004155165.1	1	1	0	0	17	0	1	0	3	0	0	1	0	0	1	3	1	3	1	0	3	0	2	7	1	0	1	0	2	1
B. pseudolongum subsp. globosum	Hippopotamus	2088B	GCA_004156075.1	1	1	0	0	16	0	0	0	3	0	0	2	0	0	0	2	1	1	1	0	3	0	1	4	0	0	1	0	2	1
B. pseudolongum subsp. globosum	Hippopotamus	2086B	GCA_004156135.1	1	1	0	0	16	0	0	0	3	0	0	2	0	0	0	2	1	1	1	0	3	0	1	4	0	0	1	0	2	1
B. pseudolongum subsp. globosum	Hippopotamus	2072B	GCA_004155565.1	2	1	1	0	17	1	1	0	3	0	0	3	0	0	1	3	1	2	1	0	3	0	2	7	0	0	1	0	2	1
B. pseudolongum subsp. globosum	Kangaroo	2009B	GCA_004155625.1	1	1	0	2	14	0	1	1	3	0	0	1	0	1	0	2	3	1	1	0	3	0	1	13	0	0	2	0	2	1
B. pseudolongum subsp. globosum	Kangaroo	2109B	GCA_004155475.1	1	1	0	0	15	0	0	0	3	0	0	0	0	0	1	3	1	3	1	0	3	0	1	3	1	0	1	0	2	1
B. pseudolongum subsp. globosum	Dolichotis	2089B	GCA_004155525.1	1	1	0	0	17	0	0	0	3	0	0	1	0	0	1	3	1	1	1	0	3	0	1	3	0	0	1	0	2	1
B. pseudolongum subsp. globosum	Horse	1577B	GCA_004156215.1	2	1	0	0	15	0	0	0	3	0	0	1	0	0	0	2	1	1	1	0	3	0	1	3	0	0	1	0	2	1
B. pseudolongum subsp. globosum	Hare	1805B	GCA_004155375.1	1	1	0	0	17	0	1	0	3	0	0	2	0	0	1	3	1	2	1	0	3	0	2	7	0	0	1	0	2	1
B. pseudolongum subsp. globosum	Chicken	1549B	GCA_002846715.1	1	1	0	0	17	0	0	0	3	0	0	0	0	0	0	2	1	1	1	0	3	0	0	3	0	0	1	0	2	1
B. pseudolongum subsp. globosum	Chicken	1511B	GCA_004155235.1	1	1	0	0	17	0	0	0	3	0	0	1	0	0	0	2	1	1	1	0	3	0	0	3	0	0	1	0	2	1
B. pseudolongum subsp. globosum	Chicken	1546B	GCA_004155845.1	1	1	0	0	17	0	0	0	3	0	0	0	0	0	0	2	1	1	1	0	3	0	0	3	0	0	1	0	2	1
B. pseudolongum subsp. globosum	Quail	2017B	GCA_004155275.1	1	1	0	0	16	0	0	0	3	0	0	2	0	0	1	3	1	1	1	0	3	0	2	3	0	0	1	1	2	1
B. pseudolongum subsp. globosum	Pigeon	1550B	GCA_004155805.1	1	1	0	0	16	0	1	0	3	0	0	1	0	0	0	2	1	1	1	0	3	0	1	7	0	0	1	0	2	1
B. pseudolongum subsp. globosum	Pigeon	2048B	GCA_004155595.1	2	1	0	0	17	0	0	0	3	0	0	3	0	0	0	2	1	1	1	0	3	0	0	3	0	0	1	0	2	1
B. pseudolongum subsp. globosum	Porcupine	2115B	GCA_004156085.1	1	1	0	0	17	0	0	0	3	0	0	1	0	0	1	3	1	1	1	0	3	0	1	3	0	0	1	0	2	1
B. pseudolongum subsp. globosum	Porcupine	2114B	GCA_004154995.1	1	1	0	0	17	0	0	0	3	0	0	1	0	0	1	3	1	1	1	0	3	0	2	3	0	0	1	0	2	1
B. pseudolongum subsp. globosum	Quail	2049B	GCA_004156115.1	1	1	0	0	16	0	0	0	3	0	0	2	0	0	1	3	1	1	1	0	3	0	2	3	0	0	1	1	2	1
B. pseudolongum subsp. globosum	Duck	1578B	GCA_004155745.1	2	1	0	0	15	0	0	0	3	0	0	1	0	0	0	2	1	1	1	0	3	0	1	3	0	0	1	0	2	1
B. pseudolongum subsp. globosum	Rodent	1520B	GCA_002846775.1	1	1	0	1	16	0	0	0	2	0	0	0	0	0	1	3	1	1	1	0	3	0	3	3	0	0	1	0	2	1
B. pseudolongum subsp. globosum	Rodent	1524B	GCA_002846815.1	1	1	1	0	16	1	0	0	2	0	0	3	0	0	0	2	1	1	1	0	3	0	1	3	0	0	1	0	2	1
B. pseudolongum subsp. globosum	Rodent	2105B	GCA_004155505.1	1	1	0	0	16	0	0	0	3	0	0	1	0	0	1	3	1	1	1	0	3	0	4	3	0	0	1	0	2	1
B. pseudolongum subsp. globosum	Mouflon	2098B	GCA_004155495.1	1	1	0	0	16	0	0	0	3	0	0	2	0	0	0	2	1	1	1	0	3	0	1	4	0	0	1	0	2	1
B. pseudolongum subsp. globosum	Snake	2093B	GCA_004155535.1	1	1	0	1	15	0	0	0	3	0	0	1	0	0	1	2	1	2	1	0	3	0	1	3	0	0	1	0	2	1
B. pseudolongum subsp. globosum	Roe Deer	1791B	GCA_004155695.1	0	1	0	0	17	0	2	0	2	0	0	1	0	0	0	1	1	0	1	0	1	0	0	7	0	0	1	0	2	0
B. pseudolongum subsp. globosum	Fox	1770B	GCA_004155705.1	1	1	0	0	15	0	0	0	3	0	0	1	2	0	0	1	1	0	1	1	3	0	3	4	0	0	0	0	2	1
B. pseudolongum subsp. globosum	Dog	2054B	GCA_004155015.1	1	1	1	1	12	1	1	0	3	0	0	0	0	1	0	2	1	0	1	0	1	0	0	10	0	0	2	0	2	0
B. pseudolongum subsp. globosum	Dog	2071B	GCA_004155135.1	1	1	1	1	16	1	0	0	3	0	0	3	0	0	0	2	1	0	1	0	3	0	0	3	0	0	1	0	2	1
B. pseudolongum subsp. globosum	Dog	2012B	GCA_004155145.1	2	1	0	1	18	0	0	0	3	0	0	1	0	0	0	2	1	1	1	0	4	0	1	3	0	0	1	0	2	1
B. pseudolongum subsp. globosum	Dog	2000B	GCA_004155285.1	1	1	1	1	15	1	1	0	3	0	0	1	1	1	0	2	1	0	1	1	2	0	1	11	0	0	2	0	2	1
B. pseudolongum subsp. globosum	Dog	2003B	GCA_004155305.1	1	1	0	2	13	0	1	1	3	0	0	2	1	1	0	2	3	1	1	1	3	0	1	12	0	0	2	0	2	1
B. pseudolongum subsp. globosum	Dog	2001B	GCA_004155645.1	1	1	1	0	16	1	0	1	3	1	0	1	0	0	0	2	1	0	1	0	3	2	1	4	0	1	1	0	2	1
B. pseudolongum subsp. globosum	Pig	LMG 11571	GCA_000741325.1	1	1	1	0	13	1	1	0	3	0	0	1	0	0	0	2	1	0	1	0	1	0	0	7	0	0	1	0	2	0
B. pseudolongum subsp. globosum	Pig	1595B	GCA_002846725.1	1	1	0	0	14	0	0	0	3	0	0	1	0	0	1	3	1	2	1	0	2	0	1	4	0	0	1	0	2	1
B. pseudolongum subsp. globosum	Pig	1370B	GCA_002846755.1	1	1	1	0	14	1	0	0	3	0	0	1	0	0	0	2	1	1	1	0	2	0	0	3	0	0	1	0	2	0
B. pseudolongum subsp. globosum	Pig	1604B	GCA_004155395.1	1	1	1	0	15	1	0	0	3	0	0	0	0	0	0	2	1	0	1	0	2	0	1	4	0	0	1	0	2	0
B. pseudolongum subsp. globosum		2113B	GCA_004155295.1	1	1	0	0	16	0	0	0	3	0	0	2	0	0	0	2	1	1	1	0	3	0	1	4	0	0	1	0	2	1
B. pseudolongum subsp. globosum	Donkey	1565B	GCA_004155795.1	1	1	0	0	17	0	0	0	3	0	0	0	0	0	0	2	1	1	1	0	3	0	0	3	0	0	1	0	2	1
B. pseudolongum subsp. globosum	Rodent	2103B	GCA_004156175.1	2	1	1	0	15	1	0	0	3	0	1	1	0	0	1	3	1	2	1	0	2	0	1	3	0	0	1	0	2	1
B. pseudolongum subsp. globosum	Dog	2002B	GCA_004156235.1	1	1	1	1	14	1	1	1	3	0	0	2	1	0	0	2	1	0	1	1	3	0	1	7	0	0	1	0	2	1
B. pseudolongum subsp. globosum	Sewage	AS09scLD_379	GCA_012727475.1	0	1	0	0	16	0	0	0	2	0	0	2	0	0	0	2	1	0	1	0	1	0	0	3	0	0	0	0	2	0
B. pseudolongum subsp. pseudolongum	Human	PV8-2	GCA_000800475.2	1	1	0	0	13	0	1	0	3	0	0	1	0	0	0	2	1	1	1	0	3	0	1	7	0	0	1	0	2	1
B. pseudolongum subsp. pseudolongum	Human	AF13-3LB	GCA_003464845.1	1	1	0	0	17	0	1	0	3	0	0	0	0	0	1	3	1	2	1	0	3	0	2	7	1	0	1	0	2	1
B. pseudolongum subsp. pseudolongum	Tapir	1629B	GCA_004155725.1	0	1	1	0	13	1	0	0	2	0	0	0	0	0	0	2	1	0	1	0	1	0	0	4	0	0	1	0	2	0
B. pseudolongum subsp. pseudolongum	Rodent	UMB-MBP-01	GCA_002282915.1	1	1	0	0	17	0	0	0	3	0	1	0	0	0	1	3	1	2	1	0	3	0	1	3	0	0	1	0	2	1
B. pseudolongum subsp. pseudolongum	Rodent	WYJ21-P61	GCA_003612445.1	1	1	0	0	15	0	1	0	3	0	0	1	0	0	1	3	1	1	1	0	3	0	2	7	0	0	1	0	2	1
B. pseudolongum subsp. pseudolongum	Rodent	NM87_A27A	GCA_004801625.1	1	1	1	0	14	1	0	0	3	0	2	2	0	0	1	3	1	2	1	0	3	0	2	2	0	0	1	0	2	0
B. pseudolongum subsp. pseudolongum	Rodent	22-20	GCA_009911435.1	1	1	0	0	15	0	1	0	3	0	0	1	0	0	1	3	1	1	1	0	3	0	2	7	0	0	1	0	2	1
B. pseudolongum subsp. pseudolongum	Pig	1612B	GCA_004155715.1	1	1	1	0	14	1	0	0	3	0	0	2	0	0	0	2	1	0	1	0	2	0	0	3	0	0	1	0	2	0
B. pseudolongum subsp. pseudolongum	Pig	1513B	GCA_004155835.1	1	1	1	0	14	1	0	0	3	0	0	0	0	0	0	2	1	0	1	0	2	0	0	3	0	0	1	0	2	0
Upper CI				0.999448	1.01401	0.341163	0.29127	16.1485	0.341163	0.411693	0.111302	2.82554	0.0421752	0.180144	1.38747	0.143366	0.111302	0.435501	2.31864	1.13522	1.01818	1	0.111302	2.64296	0.0843503	1.04639	5.06	0.111302	0.0421752	1.03019	0.0676104	2	0.774735
Lower CI				0.718862	0.957825	0.13771	0.0749274	15.5135	0.13771	0.179857	0.00137377	2.61108	-0.0140062	0.0170387	1.0069	-0.00252053	0.00137377	0.212387	2.01939	0.977455	0.615621	1	0.00137377	2.28662	-0.0280123	0.615583	3.92591	0.00137377	-0.0140062	0.828965	-0.0112724	2	0.549209
Mean				0.859155	0.985915	0.239437	0.183099	15.831	0.239437	0.295775	0.056338	2.71831	0.0140845	0.0985916	1.19718	0.0704225	0.056338	0.323944	2.16901	1.05634	0.816901	1	0.056338	2.46479	0.028169	0.830986	4.49296	0.056338	0.0140845	0.929577	0.028169	2	0.661972

## Sheet: bifidum
Genome Name	Host	Strain	Accesssion	GH1	GH101	GH110	GH112	GH123	GH129	GH13	GH136	GH2	GH20	GH23	GH25	GH29	GH3	GH33	GH36	GH42	GH43	GH5	GH77	GH84	GH89	GH95
B. bifidum	Human	S6	GCA_003390735.1	1	1	1	2	1	1	6	1	3	4	1	2	1	1	2	1	1	2	0	1	2	1	1
B. bifidum	Human	LMG 11582	GCA_001020275.1	1	1	1	2	1	1	6	1	3	4	1	2	1	1	2	1	2	2	1	1	2	1	1
B. bifidum	Human	LMG 11583	GCA_001020335.1	1	1	1	2	0	1	6	1	3	4	1	1	1	1	1	1	1	2	0	1	2	1	1
B. bifidum	Human	ICIS-310	GCA_002114145.1	1	1	1	0	1	1	6	1	2	4	0	2	1	1	2	1	2	2	0	1	2	1	1
B. bifidum	Human	TM07-4AC	GCA_003436135.1	1	1	1	3	1	1	6	1	3	4	1	1	1	1	2	1	2	3	1	1	2	1	1
B. bifidum	Human	TF07-22	GCA_003437175.1	1	1	1	2	0	1	6	1	3	4	0	1	1	1	2	1	2	2	1	1	2	1	1
B. bifidum	Human	TF06-14AC	GCA_003437325.1	1	1	1	2	1	1	6	0	3	4	0	2	1	1	2	1	1	2	0	1	2	1	1
B. bifidum	Human	AF11-25B	GCA_003465425.1	2	1	1	2	1	1	6	1	3	4	1	1	1	1	2	1	2	3	0	1	2	1	1
B. bifidum	Human	TM06-5	GCA_003466365.1	2	1	1	3	1	1	6	1	3	4	1	1	1	1	2	1	2	2	0	1	2	1	1
B. bifidum	Human	AM42-15AC	GCA_003467985.1	2	1	1	2	1	1	6	1	3	4	1	1	1	1	2	1	1	3	0	1	2	1	1
B. bifidum	Human	AM36-1AC	GCA_003468415.1	1	1	1	2	1	1	6	1	3	4	0	2	1	1	2	1	2	3	0	1	2	1	1
B. bifidum	Human	AM18-29	GCA_003470585.1	1	1	1	2	1	1	6	0	3	4	1	2	1	1	2	1	1	2	0	1	2	1	1
B. bifidum	Human	AM18-12AC	GCA_003470615.1	1	1	1	2	1	1	6	0	3	4	1	2	1	1	2	1	1	2	0	1	2	1	1
B. bifidum	Human	AF45-10	GCA_003474045.1	1	1	1	0	1	1	6	1	3	4	0	1	1	1	2	1	2	3	1	1	2	1	1
B. bifidum	Human	S791	GCA_001595435.1	1	1	1	2	1	1	6	1	2	4	0	2	1	1	2	1	2	2	0	1	2	1	1
B. bifidum	Human	LMAG:79	GCA_008679685.1	1	1	1	2	1	1	6	1	3	4	0	1	1	1	2	1	1	3	1	1	2	1	1
B. bifidum	Human	LMAG:66	GCA_008679935.1	1	1	1	2	2	1	4	1	3	4	0	1	1	1	2	1	1	2	0	1	2	1	1
B. bifidum	Human	LMAG:12	GCA_008681015.1	1	1	1	2	1	1	6	1	3	4	0	1	1	1	2	1	1	2	0	1	2	1	1
B. bifidum	Human	BIO5480	GCA_008868415.1	1	1	1	0	0	1	6	0	3	4	1	1	1	1	1	1	1	2	0	1	2	1	1
B. bifidum	Human	ca_0067	GCA_004167365.1	1	1	1	2	1	1	6	1	3	4	0	1	1	1	2	1	1	3	0	1	2	1	1
B. bifidum	Human	BSD2780061688st1_G1	GCA_005844205.1	1	1	1	2	1	1	6	1	3	4	0	2	1	1	2	1	2	2	0	1	2	1	1
B. bifidum	Human	1001271st1_H11	GCA_005844365.1	0	1	1	1	0	1	6	1	3	4	1	1	1	1	2	1	2	2	0	1	2	1	1
B. bifidum	Infant	BF3	GCA_001281345.1	2	1	1	2	1	1	6	1	3	4	1	2	1	1	2	1	2	2	0	1	2	1	1
B. bifidum	Infant	IPLA 20017	GCA_001020265.1	1	1	1	2	0	1	5	0	3	4	0	1	1	1	2	1	1	2	1	1	2	1	1
B. bifidum	Infant	A8	GCA_001020245.1	1	1	1	2	1	1	6	1	3	4	1	2	1	1	2	1	2	2	1	1	2	1	1
B. bifidum	Infant	156B	GCA_001020255.1	1	1	1	2	0	1	6	1	3	4	0	1	1	1	2	1	1	3	0	1	2	1	1
B. bifidum	Infant	LMG 13200	GCA_001020325.1	1	1	1	2	0	1	6	1	3	4	1	1	1	1	2	1	1	3	0	1	2	1	1
B. bifidum	Infant	85B	GCA_001020355.1	1	1	1	2	1	1	6	1	3	4	1	1	1	1	2	1	2	3	0	1	2	1	1
B. bifidum	Infant	324B	GCA_001020375.1	1	1	1	2	1	1	6	1	3	4	0	2	1	1	2	1	2	3	0	1	2	1	1
B. bifidum	Infant	IPLA 20015	GCA_001020405.1	1	1	1	2	1	1	6	1	3	4	0	1	1	1	2	1	1	2	0	1	2	1	1
B. bifidum	Infant	LMG 11041	GCA_000741085.1	2	1	1	2	1	1	6	1	3	4	0	2	1	1	3	1	2	3	0	1	2	1	1
B. bifidum	Human Milk	1887B	GCA_002076105.1	1	1	1	2	1	1	6	0	3	4	0	2	1	1	2	1	2	3	0	1	2	1	1
B. bifidum	Commercial dietary supplements	DS33_23	GCA_003094645.1	1	1	1	1	1	1	6	0	3	4	1	2	1	1	2	1	2	2	1	1	2	1	1
B. bifidum	Commercial dietary supplements	DS30_23	GCA_003094755.1	1	1	1	2	1	1	6	1	2	4	1	2	1	1	2	1	2	2	1	1	2	1	1
B. bifidum	Commercial dietary supplements	DS26_23	GCA_003095035.1	1	1	1	0	1	1	6	0	3	4	1	2	1	1	2	1	2	2	1	1	2	1	1
B. bifidum	Vagina	VA07-1AN	GCA_011029205.1	1	1	1	0	1	1	6	0	3	4	0	1	1	1	2	1	2	2	0	1	2	1	1
Upper CI				1.24591	1	1	1.98569	0.984649	1	6.04131	0.898589	3.01151	4	0.671575	1.64353	1	1	2.07082	1	1.75251	2.52593	0.431476	1	2	1	1
Lower CI				0.976309	1	1	1.45875	0.682018	1	5.79202	0.601411	2.82183	4	0.328425	1.30091	1	1	1.87362	1	1.41416	2.19629	0.124079	1	2	1	1
Mean				1.11111	1	1	1.72222	0.833333	1	5.91667	0.75	2.91667	4	0.5	1.47222	1	1	1.97222	1	1.58333	2.36111	0.277778	1	2	1	1

## Sheet: breve
Genome Name	Host	Strain	Accesssion	GH1	GH112	GH123	GH125	GH127	GH129	GH13	GH140	GH154	GH2	GH20	GH23	GH25	GH29	GH3	GH30	GH31	GH32	GH33	GH35	GH36	GH38	GH42	GH43	GH5	GH51	GH53	GH55	GH65	GH77	GH78	GH85	GH94	GH95
B. breve	Human	DSM 20213	GCA_000158015.1	2	1	0	1	2	1	14	0	0	5	1	0	1	0	6	1	2	2	1	1	1	3	2	0	2	0	1	0	1	2	0	1	0	1
B. breve	Human	DPC 6330	GCA_000226175.2	2	1	0	1	0	1	13	0	0	2	1	0	2	0	5	0	1	2	1	0	1	2	3	1	2	0	1	0	0	2	0	1	0	1
B. breve	Human	MCC 0476	GCA_001263845.1	1	1	0	1	1	1	13	0	0	3	1	0	1	0	5	0	2	2	1	0	1	3	2	0	2	0	1	0	1	2	0	1	0	1
B. breve	Human	MCC 0121	GCA_001264045.1	0	0	0	1	1	0	9	1	0	1	0	0	0	0	3	0	1	1	1	0	0	3	0	0	2	0	0	0	1	1	0	1	0	1
B. breve	Human	MCC 1604	GCA_001264155.1	1	1	0	1	1	1	12	0	1	2	1	0	1	0	4	1	0	2	1	0	1	2	2	0	2	0	1	1	0	2	1	0	0	1
B. breve	Human	BR-06	GCA_001685705.1	1	1	0	1	1	1	12	0	0	3	1	0	1	0	3	0	1	2	1	0	1	2	2	0	2	0	1	0	0	2	0	0	0	1
B. breve	Human	BR-19	GCA_001685805.1	2	1	0	1	1	1	14	0	0	3	1	1	1	0	4	0	1	3	1	1	1	2	2	0	2	0	1	0	1	2	1	0	0	1
B. breve	Human	BR-L29	GCA_001685945.1	2	1	0	1	1	1	13	0	0	3	1	0	1	0	4	0	2	2	1	0	1	3	2	0	2	0	1	0	1	2	0	1	0	1
B. breve	Human	UMB0915	GCA_002861455.1	2	1	0	1	0	1	14	1	0	5	1	0	3	0	7	0	0	1	1	0	2	2	2	0	2	0	1	0	1	2	0	0	1	1
B. breve	Human	UMB0089	GCA_002871815.1	1	1	0	1	0	1	13	1	0	2	1	0	1	0	4	0	1	2	1	0	1	2	2	0	2	0	1	0	0	2	0	0	0	1
B. breve	Human	Bifido_10	GCA_900157105.1	1	0	0	1	1	1	13	0	0	3	1	1	1	0	3	0	1	3	1	0	1	2	2	1	2	0	1	0	1	2	0	0	0	1
B. breve	Human	Bifido_07	GCA_900157125.1	2	1	0	1	1	1	12	0	0	4	1	0	1	0	5	0	0	1	1	0	1	2	3	1	2	0	1	0	1	2	0	0	0	1
B. breve	Human	SC95	GCA_006546585.1	1	1	0	1	1	1	13	0	0	2	1	0	3	1	4	0	1	2	1	0	1	2	3	1	2	0	1	0	0	2	0	0	0	1
B. breve	Human	JR01	GCA_009931415.1	1	1	0	1	1	1	12	0	0	2	1	1	1	0	5	0	0	1	1	0	1	2	2	0	2	0	0	0	0	2	0	0	0	1
B. breve	Infant	JTL	GCA_013267755.1	2	1	0	1	1	1	14	0	0	4	1	1	1	0	5	0	1	2	1	0	1	2	2	0	2	0	1	0	1	2	0	0	0	1
B. breve	Infant	MCC 1094	GCA_001264095.1	1	1	0	1	1	1	15	0	0	4	1	1	2	0	5	1	2	3	1	0	1	3	2	0	4	0	0	0	1	1	0	1	0	1
B. breve	Infant	BR3	GCA_001281425.1	2	1	0	1	1	1	10	0	0	4	1	0	1	0	3	0	1	2	1	1	1	2	2	0	2	0	1	0	1	2	0	0	0	1
B. breve	Infant	MCC 1114	GCA_001263855.1	1	1	0	1	1	1	13	0	0	3	1	0	1	0	5	0	2	2	1	0	1	3	2	0	2	0	1	0	1	2	0	1	0	1
B. breve	Infant	LMG 13208	GCA_000741125.1	3	1	0	1	0	1	14	1	1	5	1	1	1	0	7	2	0	2	1	0	1	2	2	0	1	0	1	1	0	2	1	1	0	1
B. breve	Infant	BBRI4	GCA_001189355.1	2	1	0	1	1	1	15	0	0	2	1	0	3	0	3	0	1	2	1	0	1	2	3	1	2	0	1	0	0	2	0	0	0	1
B. breve	Infant	S141.3	GCA_001576875.1	2	1	0	1	1	1	13	0	0	2	1	1	2	0	4	0	2	3	1	0	1	3	3	1	2	0	0	0	0	2	0	1	0	1
B. breve	Infant	1900B	GCA_002075865.1	1	1	0	1	1	1	12	0	0	2	1	1	1	0	5	0	0	1	1	0	1	2	2	0	2	0	0	0	0	2	0	0	0	1
B. breve	Infant	1891B	GCA_002076055.1	1	1	0	1	1	1	14	0	0	3	1	0	2	0	6	0	0	0	0	1	1	2	3	1	2	0	1	0	0	2	0	0	1	1
B. breve	Infant	1889B	GCA_002076075.1	1	1	0	1	1	1	12	0	0	3	1	0	2	0	6	0	0	0	0	1	1	2	3	1	2	0	1	0	0	2	0	0	1	1
B. breve	Infant	7E	GCA_002271275.1	1	1	0	1	1	1	12	0	0	3	1	0	1	0	4	0	1	1	1	1	1	3	2	0	2	0	1	0	1	2	0	1	0	1
B. breve	Infant	DRBB26	GCA_002838225.1	1	1	0	1	0	1	13	1	0	3	1	0	3	1	5	0	2	2	1	1	1	3	2	0	2	0	0	0	0	2	0	1	0	1
B. breve	Infant	NRBB56	GCA_002838425.1	1	1	0	1	1	1	13	1	0	4	1	0	2	1	4	0	2	2	1	1	1	3	2	0	2	0	1	0	1	2	0	1	0	1
B. breve	Infant	DRBB27	GCA_002838445.1	1	1	0	1	1	1	13	1	1	3	1	0	2	1	5	1	2	3	1	1	1	3	2	0	2	0	1	1	0	2	1	1	0	1
B. breve	Infant	017W439	GCA_002838465.1	1	1	0	1	1	1	13	0	0	3	1	0	1	0	4	0	2	2	1	0	1	3	2	0	2	0	1	0	1	2	0	1	0	2
B. breve	Infant	215W447a	GCA_002838485.1	1	1	0	1	1	1	13	0	0	2	1	1	1	0	3	0	0	1	1	0	1	2	2	1	2	0	1	0	0	2	0	0	0	2
B. breve	Infant	DRBB28	GCA_002838505.1	2	1	0	1	1	1	14	0	0	4	1	1	1	0	5	0	1	2	1	0	1	2	2	0	2	0	1	0	1	2	0	0	0	2
B. breve	Infant	180W83	GCA_002838525.1	1	1	0	1	1	1	12	0	0	3	1	0	1	0	5	0	0	1	1	0	1	2	2	0	2	0	1	0	1	2	1	0	0	1
B. breve	Infant	082W48	GCA_002838545.1	1	1	0	1	1	1	12	0	0	3	1	0	1	0	4	0	0	1	0	0	1	2	2	0	2	0	1	0	1	2	0	0	0	1
B. breve	Infant	139W423	GCA_002838565.1	1	1	0	1	1	1	13	0	0	2	1	0	3	1	4	0	1	2	1	0	1	2	3	1	2	0	1	0	0	2	0	0	0	1
B. breve	Infant	CNCM I-4321	GCA_002838585.1	1	1	0	1	0	1	14	0	0	3	1	0	1	0	5	0	1	3	1	0	1	2	3	1	2	0	1	0	1	2	0	1	0	1
B. breve	Infant	NRBB18	GCA_002838605.1	2	1	0	1	0	1	13	1	0	4	1	0	1	0	5	0	1	2	1	0	1	3	2	0	2	0	0	0	1	2	0	1	0	1
B. breve	Infant	NRBB49	GCA_002838685.1	2	1	0	0	1	1	14	0	0	5	1	1	1	0	5	1	1	2	1	1	1	0	2	0	1	0	1	0	1	2	0	0	0	1
B. breve	Infant	lw01	GCA_003860285.1	1	1	0	1	0	1	13	0	0	2	1	0	2	0	6	0	0	1	1	1	1	2	3	1	2	0	1	0	0	2	0	1	0	1
B. breve	Infant	BR03	GCA_004319685.1	2	1	0	1	1	1	11	0	1	2	1	0	2	0	3	1	1	1	1	0	1	3	2	0	2	0	0	1	0	2	2	1	0	1
B. breve	Infant	IDCC4401	GCA_009429085.1	1	1	0	1	1	1	13	0	0	3	1	0	1	0	5	0	2	2	1	0	1	3	2	0	2	0	1	0	1	2	0	1	0	1
B. breve	Infant	JSRL01	GCA_009498435.1	1	1	0	1	1	0	12	0	0	2	1	0	1	0	5	0	0	1	1	0	1	2	2	0	2	0	0	0	0	2	0	0	0	1
B. breve	Infant	NCTC11815	GCA_900637145.1	1	0	0	1	0	1	12	1	1	3	1	0	1	0	5	1	2	3	1	1	1	3	2	0	2	0	1	1	0	2	1	1	0	1
B. breve	Infant	LH_24	GCA_902505445.1	1	1	0	1	0	1	12	1	1	3	1	0	1	0	4	1	2	2	1	1	1	3	2	0	2	0	1	1	0	2	1	1	0	1
B. breve	Infant	LH_21	GCA_902505485.1	2	2	0	1	0	1	11	0	0	2	1	0	0	0	4	0	0	1	1	0	1	1	2	1	1	0	0	0	0	1	0	0	0	1
B. breve	Human Milk	CECT 7263	GCA_000247755.2	3	1	0	1	1	1	12	1	0	4	1	0	2	0	4	1	1	1	1	1	1	3	2	0	2	0	0	0	0	2	1	1	0	1
B. breve	Human Milk	31L	GCA_000568875.1	2	1	0	1	1	1	13	0	0	3	1	0	1	0	5	0	1	2	1	0	1	2	2	0	2	0	1	0	1	2	0	1	0	1
B. breve	Human Milk	2L	GCA_000568895.1	1	1	0	1	1	1	12	0	0	2	1	1	1	0	5	0	0	1	1	0	1	2	2	0	2	0	0	0	0	2	0	0	0	1
B. breve	Human Milk	CECT7263	GCA_002027265.1	1	1	0	1	0	1	15	0	0	2	1	0	2	0	4	0	1	2	1	0	1	2	3	1	2	0	0	0	0	2	0	0	0	1
B. breve	Human Milk	INIA P734	GCA_901980275.1	0	1	0	1	0	1	13	0	0	2	1	1	1	0	3	0	1	1	1	0	1	3	2	1	2	0	1	0	0	2	0	1	0	1
B. breve	Food product - supplement	LMG S-29190	GCA_002914865.1	1	1	0	1	0	1	14	1	0	3	1	0	1	0	5	0	2	2	1	0	1	3	3	1	2	0	1	0	1	2	0	1	0	1
B. breve	Fermented food	UBBR-01	GCA_004802595.1	3	1	0	1	1	1	15	0	1	2	1	0	3	0	5	1	1	1	1	1	1	3	2	1	2	0	1	1	0	2	1	1	1	1
B. breve	Commercial dietary supplements	DS15_17	GCA_003095095.1	1	1	0	1	1	1	13	0	0	2	1	0	4	0	5	0	1	2	1	0	1	2	2	0	2	0	1	0	0	2	0	0	0	1
B. breve	Vagina	ACS-071-V-Sch8b	GCA_000213865.1	2	1	1	1	1	1	14	0	0	4	1	1	3	0	5	0	1	2	1	0	1	2	2	0	2	0	1	0	1	2	0	1	0	1
B. breve	Vagina	JCP7499	GCA_000466545.1	1	1	0	1	1	1	13	0	1	3	1	0	1	0	6	1	0	1	1	0	1	2	2	0	2	0	1	1	0	2	1	1	0	1
B. breve	Vagina	GED8481	GCA_001546235.1	2	1	0	1	1	1	14	0	0	2	1	0	1	0	5	0	2	3	1	0	1	2	2	0	2	0	1	0	0	3	0	1	0	1
B. breve	Vagina	N6D12	GCA_003370105.1	1	1	0	1	1	1	13	1	0	3	1	0	1	0	5	0	1	2	1	0	1	2	3	1	2	0	1	0	0	2	0	0	0	1
B. breve	Vagina	W20-13	GCA_003370125.1	2	1	0	1	1	1	13	0	0	2	1	0	1	0	4	0	1	2	1	0	1	2	2	0	2	0	1	0	0	2	0	1	0	1
B. breve	Vagina	S12-4	GCA_003370155.1	1	1	0	1	0	1	13	1	1	3	1	0	2	0	5	1	2	3	1	1	1	3	2	0	2	0	1	1	0	2	1	1	0	1
B. breve	Vagina	322-1	GCA_003370175.1	1	1	0	1	1	1	12	0	0	3	1	1	2	0	3	0	0	1	1	0	1	2	3	1	2	0	1	0	1	2	0	0	0	1
B. breve	Vagina	30-1	GCA_003370195.1	1	1	0	1	1	1	13	0	0	2	1	0	1	0	6	0	1	2	1	0	1	2	3	1	2	0	1	0	0	2	1	1	0	1
B. breve	Vagina	W56	GCA_003370265.1	1	1	0	1	1	1	13	0	0	2	1	0	1	0	6	0	1	2	1	0	1	2	3	1	2	0	1	0	0	2	1	1	0	1
B. breve	Vagina	91-1	GCA_003370295.1	1	1	0	1	1	1	12	0	0	2	1	1	1	0	5	0	0	1	1	0	1	2	2	0	2	0	0	0	0	2	0	0	0	1
B. breve	Free-living	LMC520	GCA_001990225.1	1	1	0	1	0	1	15	0	0	2	1	0	2	0	4	0	1	2	1	0	1	2	3	1	2	0	0	0	0	2	0	0	0	1
B. breve	Basil	B.breve_2_mod	GCA_902167575.1	1	1	0	1	0	1	11	0	1	3	1	0	1	0	4	1	2	2	1	1	1	3	1	0	2	0	1	1	0	2	1	0	0	1
B. breve		UCC2003	GCA_000220135.1	1	1	0	1	1	1	13	0	0	2	1	1	1	0	3	0	0	1	1	0	1	2	2	1	2	0	1	0	0	2	0	0	0	1
B. breve		HPH0326	GCA_000411435.1	1	1	0	1	1	1	12	0	0	3	1	0	1	0	5	0	1	1	1	0	1	3	2	0	2	0	1	0	1	2	0	1	0	1
B. breve		12L	GCA_000568955.1	1	1	0	1	1	1	12	0	0	2	1	1	1	0	5	0	0	1	1	0	1	2	2	0	2	0	0	0	0	2	0	0	0	1
B. breve		JCM 7017	GCA_000568975.1	2	1	0	1	0	1	14	1	0	4	1	0	0	0	4	0	1	0	1	0	1	3	2	0	2	0	0	0	0	2	0	1	0	1
B. breve		JCM 7019	GCA_000569015.1	2	1	0	1	0	1	14	0	0	4	1	1	1	0	5	0	0	2	1	0	1	2	2	1	2	0	1	0	1	2	0	0	0	1
B. breve		NCFB 2258	GCA_000569035.1	0	1	0	0	0	1	12	0	0	2	1	0	1	0	4	0	1	2	1	0	1	0	2	1	1	1	0	0	0	2	0	0	0	1
B. breve		689b	GCA_000569055.1	2	1	0	1	2	1	14	0	0	5	1	0	1	0	6	1	2	2	1	1	1	3	2	0	2	0	1	0	1	2	0	1	0	1
B. breve		S27	GCA_000569075.1	1	1	0	1	1	1	13	0	0	3	1	0	1	0	5	0	2	2	1	0	1	3	2	0	2	0	1	0	1	2	0	1	0	1
B. breve		JCM 1192	GCA_001025175.1	1	1	0	1	1	1	12	0	0	2	1	1	1	0	5	0	0	1	1	0	1	2	2	0	2	0	0	0	0	2	0	0	0	1
B. breve		FDAARGOS_561	GCA_003813065.1	1	1	0	1	0	1	13	0	0	2	1	0	2	0	6	0	0	1	1	1	1	2	3	1	2	0	1	0	0	2	0	1	0	1
B. breve		BIO6018	GCA_008868405.1	2	1	0	1	2	1	14	0	0	4	0	0	1	0	5	1	2	2	1	1	1	3	2	0	2	0	1	0	1	2	0	1	0	1
B. breve		RP2	GCA_900102865.1	1	1	0	1	1	1	11	0	0	3	1	0	1	0	5	0	1	2	1	0	1	2	2	0	2	0	1	0	1	2	0	1	0	1
B. breve		MC1	GCA_901212525.1	1	1	0	1	0	1	11	1	1	3	1	0	1	0	5	1	2	3	1	1	1	3	2	0	2	0	1	1	0	2	1	1	0	1
B. breve		B.breve_1_mod	GCA_902167875.1	1	1	0	1	1	1	10	0	0	2	1	0	0	0	3	0	0	1	1	1	1	2	3	0	2	0	1	0	0	2	0	0	0	1
B. breve		JG_Bg463	GCA_902167895.1	1	1	0	1	0	1	10	0	0	3	1	0	2	0	5	0	0	2	1	0	1	2	2	0	2	0	1	0	0	2	0	1	0	1
B. breve		MGYG-HGUT-02469	GCA_902387425.1	1	1	0	1	1	1	11	0	0	4	1	1	0	0	4	1	1	2	1	0	1	1	2	0	1	0	1	0	0	2	0	0	0	1
Upper CI				1.4611	1.02476	0.0373806	1.00996	0.864737	1.00996	13.035	0.289577	0.21462	3.07956	1.00996	0.361033	1.52383	0.116708	4.8356	0.339165	1.11944	1.88717	1.00505	0.374994	1.03541	2.42999	2.31419	0.429889	2.03714	0.0373806	0.857799	0.21462	0.509709	2.02476	0.310715	0.636831	0.0988073	1.08005
Lower CI				1.1889	0.925239	-0.0123806	0.940037	0.635263	0.940037	12.49	0.110423	0.0603797	2.67044	0.940037	0.163967	1.17617	0.008292	4.4144	0.135835	0.780556	1.56283	0.919955	0.175006	0.964592	2.14501	2.08581	0.220111	1.88786	-0.0123806	0.667201	0.0603797	0.290291	1.92524	0.114285	0.413168	0.00119272	0.994954
Mean				1.325	0.975	0.0125	0.975	0.75	0.975	12.7625	0.2	0.1375	2.875	0.975	0.2625	1.35	0.0625	4.625	0.2375	0.95	1.725	0.9625	0.275	1	2.2875	2.2	0.325	1.9625	0.0125	0.7625	0.1375	0.4	1.975	0.2125	0.525	0.05	1.0375

## Sheet: infantis
Genome Name	Host	Strain	Accesssion	GH1	GH101	GH109	GH112	GH120	GH121	GH123	GH125	GH127	GH129	GH13	GH136	GH151	GH163	GH2	GH20	GH23	GH25	GH27	GH29	GH3	GH30	GH31	GH32	GH33	GH35	GH36	GH38	GH42	GH43	GH5	GH51	GH53	GH65	GH77	GH85	GH95
B. longum subsp. infantis	Human	CCUG 52486	GCA_000155415.1	0	1	0	1	1	1	0	0	2	1	10	0	0	0	1	1	0	0	1	0	3	1	2	1	0	1	0	0	2	17	1	4	0	0	2	0	0
B. longum subsp. infantis	Human	EK3	GCA_000730125.1	2	0	1	1	1	0	0	1	0	1	8	0	0	0	2	2	0	1	0	1	1	0	0	2	2	1	3	1	2	2	2	1	0	0	2	0	1
B. longum subsp. infantis	Human	BIC1206122787	GCA_000825005.1	1	0	0	1	0	0	0	1	0	1	8	0	0	0	2	3	0	3	0	1	2	0	0	3	2	1	2	0	3	1	2	1	0	0	2	0	1
B. longum subsp. infantis	Human	BIC1401111250	GCA_000825045.1	1	0	0	1	0	0	0	1	0	1	8	0	0	0	2	3	0	3	0	1	2	0	0	3	2	1	2	0	3	1	2	1	0	0	2	0	1
B. longum subsp. infantis	Human	BI-G201	GCA_013204895.1	2	0	1	1	1	0	0	1	0	1	7	0	0	0	2	2	0	1	0	1	1	0	0	2	2	1	3	1	2	2	2	1	0	0	2	0	1
B. longum subsp. infantis	Infant	BT1	GCA_001281305.1	0	0	0	1	0	0	0	1	0	1	8	0	0	0	2	3	0	0	0	3	4	0	0	1	2	1	2	0	2	0	3	1	0	0	2	1	1
B. longum subsp. infantis	Infant	TPY12-1	GCA_001870755.1	1	0	0	1	0	0	1	1	0	1	8	1	0	0	2	2	1	1	0	2	3	0	2	1	2	1	2	0	2	2	3	1	0	0	2	1	1
B. longum subsp. infantis	Infant	1888B	GCA_002076025.1	0	0	0	1	0	0	0	1	0	1	8	0	0	0	2	3	0	0	0	2	4	0	0	1	2	1	2	0	2	0	3	1	0	0	2	1	1
B. longum subsp. infantis	Infant	Bi-26	GCA_004919065.2	2	0	1	1	1	0	0	1	0	1	8	0	0	0	2	2	0	1	0	3	1	0	0	2	2	1	3	1	2	2	2	1	0	0	2	0	1
B. longum subsp. infantis	Infant	BIO5478	GCA_008868445.1	2	0	1	1	1	0	0	1	0	1	8	0	0	0	2	2	0	1	0	3	1	0	0	2	2	1	3	1	2	2	2	1	0	0	2	0	1
B. longum subsp. infantis	Infant	LH_665	GCA_902505515.1	1	0	0	1	0	0	1	1	0	1	8	1	1	0	2	2	0	1	0	1	2	0	0	3	2	1	3	1	3	1	2	1	0	0	2	0	1
B. longum subsp. infantis	Infant	LH_666	GCA_902505525.1	1	0	0	1	1	0	1	1	0	1	8	1	1	0	2	2	0	1	0	2	2	0	0	3	2	1	3	1	3	3	2	1	0	0	2	0	1
B. longum subsp. infantis	Infant	LH_23	GCA_902505535.1	1	0	1	1	0	0	1	1	0	1	9	1	0	0	2	2	0	2	0	2	2	0	1	3	2	1	2	0	3	2	2	1	0	0	2	0	1
B. longum subsp. infantis	Infant	LH_664	GCA_902505555.1	1	0	0	1	0	0	1	1	0	1	8	1	1	0	2	2	0	1	0	3	2	0	0	3	2	1	3	1	3	1	2	1	0	0	2	0	1
B. longum subsp. infantis	Fermented food	UBBI-01	GCA_004803425.1	1	0	1	1	0	0	1	1	0	1	9	1	1	0	2	2	0	1	0	1	2	0	1	3	2	1	2	0	2	1	3	1	0	0	2	1	1
B. longum subsp. infantis		ATCC 15697	GCA_000020425.1	1	0	0	1	0	0	0	1	0	1	8	0	1	0	2	3	0	4	0	3	2	0	0	3	2	1	2	0	3	1	2	1	0	0	2	0	1
B. longum subsp. infantis		157F	GCA_000196575.1	0	1	0	1	1	1	0	1	2	1	9	0	0	0	2	1	1	1	1	0	5	1	2	1	0	1	2	0	2	7	2	4	1	1	2	0	0
B. longum subsp. infantis		JCM 1222	GCA_000269965.1	1	0	0	1	0	0	0	1	0	1	8	0	1	0	2	3	0	4	0	3	2	0	0	3	2	1	2	0	3	1	2	1	0	0	2	0	1
B. longum subsp. infantis		DSM 20088	GCA_000771105.1	1	0	0	1	0	0	0	1	0	1	8	0	0	0	2	3	0	2	0	1	2	0	0	3	2	1	0	0	3	1	2	1	0	0	2	0	1
B. longum subsp. infantis	Free-living	BIC1307292462	GCA_000825025.1	1	0	0	1	0	0	0	1	0	1	8	0	0	0	2	3	0	3	0	1	2	0	0	5	2	1	2	0	3	1	2	1	0	0	2	0	1
B. longum subsp. infantis	Free-living	BIC1401212621a	GCA_000825065.1	1	0	0	1	0	0	0	1	0	1	8	0	0	0	2	3	0	3	0	1	2	0	0	3	2	1	2	0	3	1	2	1	0	0	2	0	1
B. longum subsp. infantis	Free-living	BIC1401212621b	GCA_000825085.1	1	0	0	1	0	0	0	1	0	1	8	0	0	0	2	3	0	3	0	1	2	0	0	3	2	1	2	0	3	1	2	1	0	0	2	0	1
B. longum subsp. infantis	Free-living	BIB1401242951	GCA_000825105.1	1	0	0	1	0	0	0	1	0	1	8	0	0	0	2	3	0	3	0	1	2	0	0	3	2	1	2	0	3	1	2	1	0	0	2	0	1
B. longum subsp. infantis	Free-living	BIB1401272845a	GCA_000825125.1	1	0	0	1	0	0	0	1	0	1	8	0	0	0	2	3	0	3	0	1	2	0	0	3	2	1	2	0	3	1	2	1	0	0	2	0	1
B. longum subsp. infantis	Free-living	BIB1401272845b	GCA_000825145.1	1	0	0	1	0	0	0	1	0	1	8	0	0	0	2	3	0	3	0	1	2	0	0	3	2	1	2	0	3	1	2	1	0	0	2	0	1
B. longum subsp. infantis	Frozen shrimp	S5	GCA_902167565.1	0	0	1	1	0	0	0	1	0	1	8	0	2	0	1	3	0	0	0	4	2	0	1	0	2	1	4	1	2	1	3	1	0	0	2	1	1
B. longum subsp. infantis	Frozen shrimp	S4	GCA_902167595.1	0	0	1	1	0	0	0	1	0	1	8	1	0	0	3	3	0	2	0	1	4	1	0	1	2	1	2	0	2	1	2	1	0	0	2	0	1
B. longum subsp. infantis	Frozen shrimp	3_mod	GCA_902167615.1	0	0	0	1	0	0	0	1	0	1	11	0	0	0	1	2	0	1	0	2	2	0	1	1	2	1	2	0	2	1	1	1	1	0	2	0	1
B. longum subsp. infantis	Sesame seeds	2_mod	GCA_902167555.1	1	0	0	1	0	0	0	1	0	1	9	1	1	1	3	2	0	0	0	3	1	0	1	3	2	1	3	1	2	2	2	1	0	0	2	0	1
B. longum subsp. infantis	Cumin seeds	S6	GCA_902167885.1	1	0	0	1	0	0	0	1	0	1	8	0	1	0	2	3	0	4	0	3	2	0	0	3	2	1	2	0	3	1	2	1	0	0	2	0	1
B. longum subsp. infantis		CECT 7210	GCA_001051015.2	0	1	0	1	1	1	0	1	2	1	9	0	0	0	1	1	0	2	1	0	5	1	3	1	0	2	2	0	2	12	2	5	1	0	2	1	0
B. longum subsp. infantis		IN-07	GCA_001686105.1	0	1	0	1	0	0	1	1	0	1	9	1	1	0	1	2	0	1	0	2	4	0	0	2	2	1	2	0	3	1	3	1	0	0	2	1	1
B. longum subsp. infantis		IN-F29	GCA_001686125.1	0	0	1	1	0	0	0	2	0	1	8	0	1	0	1	3	0	0	0	4	2	0	0	1	2	1	1	0	2	0	3	1	0	0	2	2	1
B. longum subsp. infantis		CECT 7210	GCA_002900845.1	0	1	0	1	1	1	0	1	2	1	9	0	0	0	1	1	0	2	1	0	5	1	3	1	0	2	2	0	2	12	2	5	1	0	2	1	0
B. longum subsp. infantis		NCTC13219	GCA_900445755.1	0	0	0	1	0	0	0	1	0	1	7	0	1	0	1	3	0	4	0	3	2	0	0	1	1	1	2	0	3	1	2	1	0	0	2	0	1
B. longum subsp. infantis		NCTC11817	GCA_900637215.1	1	0	0	1	0	0	0	1	0	1	8	0	1	0	2	3	0	4	0	3	2	0	0	3	2	1	2	0	3	1	2	1	0	0	2	0	1
B. longum subsp. infantis		BG463	GCA_902167775.1	1	0	1	1	0	0	0	1	0	1	8	0	0	0	2	2	0	1	0	1	3	0	0	1	2	1	2	0	2	1	2	1	0	0	2	1	1
B. longum subsp. infantis		Bg463	GCA_902167915.1	1	0	1	1	0	0	0	1	0	1	5	0	0	0	2	2	0	1	0	1	3	0	0	1	2	0	2	0	2	1	2	1	0	0	2	1	1
Upper CI				0.993928	0.244179	0.440542	1	0.378459	0.20749	0.31334	1.07642	0.41498	1	8.47875	0.378459	0.546349	0.0796366	2.00469	2.61805	0.127013	2.22283	0.20749	2.10875	2.7846	0.244179	0.730196	2.51245	1.97152	1.1195	2.3753	0.378459	2.66655	3.50239	2.28765	1.73027	0.20749	0.0796366	2	0.488458	0.996964
Lower CI				0.58502	0.018979	0.138405	1	0.0952247	0.00303614	0.0550808	0.923581	0.00607228	1	7.88967	0.0952247	0.190493	-0.0270051	1.67952	2.17142	-0.0217495	1.35612	0.00303614	1.36494	2.05751	0.018979	0.164541	1.80334	1.55479	0.933133	1.88786	0.0952247	2.33345	1.12918	1.97551	1.00657	0.00303614	-0.0270051	2	0.143121	0.79251
Mean				0.789474	0.131579	0.289474	1	0.236842	0.105263	0.184211	1	0.210526	1	8.18421	0.236842	0.368421	0.0263158	1.84211	2.39474	0.0526316	1.78947	0.105263	1.73684	2.42105	0.131579	0.447368	2.15789	1.76316	1.02632	2.13158	0.236842	2.5	2.31579	2.13158	1.36842	0.105263	0.0263158	2	0.31579	0.894737

## Sheet: adolescentis
Genome Name	Host	Strain	Accesssion	GH1	GH10	GH112	GH120	GH121	GH125	GH127	GH13	GH2	GH23	GH25	GH26	GH27	GH29	GH3	GH30	GH31	GH32	GH35	GH36	GH38	GH42	GH43	GH5	GH51	GH59	GH73	GH77	GH8	GH85	GH94	GH95
B. adolescentis	Human	BBMN23	GCA_000817995.1	0	0	0	1	1	0	2	17	1	0	3	0	0	0	6	1	2	2	0	2	1	3	8	2	1	0	0	2	1	0	1	0
B. adolescentis	Human	IVS-1	GCA_000829865.1	2	0	0	1	0	0	1	7	4	1	1	1	0	0	5	1	1	1	1	2	0	2	7	2	1	0	0	2	1	0	1	0
B. adolescentis	Human	S150	GCA_001010915.1	1	0	0	1	0	0	2	14	3	0	3	0	0	0	5	1	2	1	0	4	0	3	7	1	1	0	0	2	1	0	1	0
B. adolescentis	Human	2789STDY5834850	GCA_001406215.1	1	0	0	1	0	0	1	17	3	1	1	0	0	0	6	1	1	2	1	2	1	4	7	2	1	0	0	2	1	0	1	0
B. adolescentis	Human	2789STDY5608824	GCA_001406455.1	1	0	0	1	0	0	2	15	3	0	2	0	0	0	6	1	3	1	1	4	1	4	7	2	1	0	0	2	1	0	1	1
B. adolescentis	Human	2789STDY5608862	GCA_001406735.1	2	0	0	1	0	0	1	15	4	0	2	1	0	0	6	1	1	2	0	2	1	4	8	3	1	0	0	2	1	0	1	0
B. adolescentis	Human	Km 4	GCA_001756865.1	1	0	0	1	0	0	1	15	3	0	2	0	0	0	5	1	2	1	0	2	0	4	8	2	1	0	0	2	1	0	1	0
B. adolescentis	Infant	1892B	GCA_002075965.1	1	0	0	1	0	0	1	17	3	0	2	0	0	0	6	1	2	2	0	3	0	4	7	2	1	0	0	2	1	0	1	0
B. adolescentis	Human	42B	GCA_002107925.1	1	0	0	1	0	0	1	16	3	0	3	0	0	0	6	1	1	1	1	3	0	4	7	1	1	0	0	2	1	0	1	0
B. adolescentis	Human	70B	GCA_002107955.1	1	0	0	1	0	0	2	14	3	0	1	0	0	0	6	3	1	1	1	4	1	4	9	2	1	1	0	2	1	0	1	0
B. adolescentis	Human	AL12-4	GCA_002107975.1	1	0	0	2	0	0	1	15	4	0	1	1	1	0	6	0	2	2	1	2	1	3	9	1	1	0	0	2	2	0	1	0
B. adolescentis	Human	LMG 10734	GCA_002107995.1	1	0	0	1	1	0	2	17	3	0	1	0	0	0	5	1	1	1	1	2	0	4	8	2	1	0	0	2	1	0	0	0
B. adolescentis	Human	487B	GCA_002108015.1	1	0	0	2	0	0	2	15	3	1	3	0	0	0	5	1	1	2	1	3	0	3	9	2	1	0	1	2	2	0	1	0
B. adolescentis	Human	703B	GCA_002108035.1	0	1	0	1	0	0	1	13	3	0	1	1	1	0	6	1	1	2	1	2	1	3	9	2	2	0	0	3	2	0	1	0
B. adolescentis	Human	BIO5485	GCA_013249115.1	2	0	0	1	0	0	1	10	3	0	1	1	0	0	5	1	1	2	1	2	1	3	6	2	2	0	0	2	1	0	0	0
B. adolescentis	Human	NCTC11814	GCA_900445615.1	2	0	0	1	0	0	1	14	3	0	1	1	1	0	6	1	1	2	2	2	1	4	7	2	2	0	0	2	1	0	0	0
B. adolescentis		ATCC 15703	GCA_000010425.1	2	0	0	1	0	0	1	13	3	0	1	1	1	0	6	1	1	2	1	2	1	3	7	2	2	0	0	2	1	0	0	0
B. adolescentis		L2-32	GCA_000154085.1	1	0	0	1	0	0	2	19	3	0	3	0	0	0	6	1	1	1	1	4	1	4	7	2	1	0	0	2	1	0	1	0
B. adolescentis		S3	GCA_000435235.1	0	0	0	0	1	0	2	15	3	0	0	0	0	0	6	1	1	1	1	2	1	4	7	3	1	0	0	2	0	0	1	0
B. adolescentis		22L	GCA_000737885.1	2	0	0	1	0	0	2	16	4	0	2	1	0	0	5	1	1	2	0	3	0	3	7	2	1	0	0	2	1	0	1	0
B. adolescentis		AD2-8	GCA_002108045.1	1	0	0	1	1	0	2	17	3	0	2	0	0	1	6	1	2	1	0	2	1	4	8	4	1	0	0	2	1	0	1	0
B. adolescentis		AL46-2	GCA_002108075.1	0	0	0	1	0	0	1	18	3	0	1	0	1	0	5	1	2	1	0	3	1	4	7	1	1	0	0	2	1	0	1	0
B. adolescentis		AL46-7	GCA_002108095.1	1	0	0	1	0	0	1	15	4	0	2	1	0	0	7	1	1	2	0	2	0	4	7	1	1	0	0	2	1	0	1	0
B. adolescentis		LMG 10733	GCA_002108135.1	2	0	0	1	0	0	1	13	3	0	1	1	1	0	6	1	1	2	1	2	1	4	6	2	2	0	0	2	1	0	0	0
B. adolescentis		LMG 11579	GCA_002108155.1	1	0	0	1	0	0	1	16	2	0	1	0	0	0	5	0	2	1	0	2	0	2	7	1	1	0	0	2	1	0	0	0
B. adolescentis		LMG 18897	GCA_002108165.1	1	0	0	1	0	0	1	17	2	1	1	0	0	0	6	1	2	1	0	2	1	3	7	3	1	0	0	2	1	0	1	0
B. adolescentis		S1-11	GCA_003030905.1	1	0	0	1	0	0	1	13	3	1	1	0	0	0	5	0	1	2	0	2	0	3	8	1	1	0	0	2	1	0	1	0
B. adolescentis		S6	GCA_003429385.1	1	0	0	1	0	0	1	16	3	0	1	0	0	0	4	1	2	2	0	2	1	2	7	1	1	0	0	2	1	0	1	0
B. adolescentis		TM06-4	GCA_003436185.1	0	0	0	1	1	0	2	16	3	0	1	0	0	0	5	1	0	2	0	2	0	2	9	2	1	0	0	2	1	0	1	0
B. adolescentis		TF06-2AC	GCA_003437735.1	0	0	0	1	0	0	1	16	3	0	1	0	0	0	5	0	1	2	0	2	1	3	9	2	2	0	0	2	1	0	1	0
B. adolescentis		TF06-29	GCA_003437755.1	0	0	0	1	0	0	1	16	3	0	1	0	0	0	5	0	1	2	0	2	1	3	9	2	2	0	0	2	1	0	1	0
B. adolescentis		TF06-10AC	GCA_003437775.1	0	0	0	1	0	0	1	16	3	0	1	0	0	0	5	0	1	2	0	2	1	3	9	2	2	0	0	2	1	0	1	0
B. adolescentis		AF28-4AC	GCA_003457765.1	0	0	0	1	1	0	2	17	2	0	2	0	0	0	5	1	1	2	0	2	0	2	9	2	1	0	0	2	1	0	0	0
B. adolescentis		AF21-27	GCA_003458805.1	0	0	0	1	0	0	1	16	3	0	1	0	0	0	5	1	1	2	0	3	0	2	7	1	1	0	0	2	1	0	1	0
B. adolescentis		OF04-5	GCA_003462885.1	0	0	0	1	1	0	2	17	2	0	2	0	0	0	5	1	1	2	0	2	0	2	9	2	1	0	0	2	1	0	0	0
B. adolescentis		OF04-9AC	GCA_003462895.1	0	0	0	1	1	0	2	17	2	0	2	0	0	0	5	1	1	2	0	2	0	2	9	2	1	0	0	2	1	0	0	0
B. adolescentis		AF15-3	GCA_003464325.1	0	0	1	1	1	1	2	16	2	1	2	0	0	0	5	1	3	2	0	2	3	2	9	3	1	0	0	2	1	1	1	0
B. adolescentis		AF14-56	GCA_003465205.1	0	0	0	1	0	0	1	17	2	0	3	0	0	0	5	1	1	2	0	3	0	2	7	1	1	0	0	2	1	0	1	0
B. adolescentis		TM06-51	GCA_003466335.1	0	0	0	1	1	0	2	17	3	0	2	0	0	0	5	1	0	2	0	2	1	2	11	2	1	0	0	2	1	0	1	0
B. adolescentis		AM41-17	GCA_003467335.1	1	0	0	1	1	0	2	16	2	0	1	1	0	0	5	1	1	2	0	2	0	2	8	1	1	0	0	2	1	0	1	0
B. adolescentis		AM36-3AC	GCA_003468385.1	0	0	0	1	1	0	2	16	2	1	1	0	0	0	5	1	2	2	0	2	1	2	9	1	1	0	0	2	1	0	1	0
B. adolescentis		AM34-11	GCA_003469145.1	0	0	0	1	1	0	2	17	2	0	1	0	0	0	5	1	1	3	0	2	1	2	9	2	1	0	0	2	1	0	1	0
B. adolescentis		AM14-37	GCA_003472095.1	2	0	0	1	1	0	2	17	3	0	3	1	0	0	5	1	1	2	0	2	0	2	8	1	1	0	0	2	1	0	1	0
B. adolescentis		AF45-19	GCA_003473345.1	0	0	0	0	0	0	0	7	2	0	3	0	0	0	2	0	1	0	0	0	0	4	4	0	1	0	0	1	1	0	0	0
B. adolescentis		P2P3	GCA_003856735.1	1	0	0	1	0	0	1	17	4	0	1	1	0	0	5	1	1	1	0	2	0	2	7	1	1	0	0	2	1	0	0	0
B. adolescentis		ca_0067	GCA_004167585.1	1	0	0	1	0	0	1	17	3	0	2	0	0	0	5	0	1	2	1	2	0	2	7	1	1	0	0	2	1	0	1	0
B. adolescentis		BIOML-A227	GCA_009075795.1	1	0	0	1	0	0	1	16	3	0	2	0	0	0	3	1	1	1	1	2	1	3	8	2	1	0	0	2	1	0	1	0
B. adolescentis		BIOML-A188	GCA_009075895.1	1	0	0	1	0	0	1	17	3	0	2	0	0	0	5	1	1	1	1	2	0	3	7	1	1	0	0	2	1	0	1	0
B. adolescentis		BIOML-A8	GCA_009095375.1	2	0	0	1	0	0	2	17	3	0	1	1	0	0	5	1	2	1	0	3	0	3	8	2	2	0	0	2	1	0	1	0
B. adolescentis		ZJ2	GCA_009832825.1	0	0	0	1	1	0	2	17	2	0	1	0	0	0	5	1	1	2	0	2	0	2	10	2	1	0	0	2	1	0	1	0
Upper CI				1.00702	0.0601915	0.0601915	1.0812	0.431558	0.0601915	1.57288	16.1477	3.02481	0.239614	1.82237	0.4089	0.213291	0.0601915	5.46649	1.01636	1.45263	1.79994	0.530711	2.47923	0.714247	3.19645	8.13968	1.96348	1.29029	0.0601915	0.0601915	2.05742	1.12038	0.0601915	0.898923	0.0601915
Lower CI				0.592982	-0.0201915	-0.0201915	0.918801	0.168442	-0.0201915	1.26712	14.8123	2.65519	0.0403862	1.37763	0.1511	0.0267093	-0.0201915	5.01351	0.743644	1.10737	1.48006	0.229289	2.08077	0.365753	2.72355	7.46032	1.55652	1.06971	-0.0201915	-0.0201915	1.94258	0.959617	-0.0201915	0.661077	-0.0201915
Mean				0.8	0.02	0.02	1	0.3	0.02	1.42	15.48	2.84	0.14	1.6	0.28	0.12	0.02	5.24	0.88	1.28	1.64	0.38	2.28	0.54	2.96	7.8	1.76	1.18	0.02	0.02	2	1.04	0.02	0.78	0.02

## Sheet: pseudocatenulatum
Genome Name	Host	Strain	Accesssion	GH1	GH10	GH120	GH121	GH125	GH127	GH13	GH146	GH2	GH20	GH23	GH25	GH27	GH3	GH30	GH31	GH32	GH35	GH36	GH38	GH42	GH43	GH5	GH51	GH77	GH78	GH8	GH95
B. pseudocatenulatum	Human	IPLA36007	GCA_000708005.1	1	0	1	1	1	1	13	0	4	1	0	0	0	5	1	2	1	1	3	0	3	12	1	2	2	1	2	0
B. pseudocatenulatum	Human	2789STDY5834840	GCA_001405035.1	1	0	2	1	1	1	14	1	4	1	0	2	1	4	1	2	1	0	3	0	3	10	2	2	2	0	2	0
B. pseudocatenulatum	Human	S121.5	GCA_001576885.1	0	0	2	1	1	1	4	1	0	0	0	1	0	2	1	0	1	0	1	0	2	10	1	2	1	1	2	0
B. pseudocatenulatum	Human	1E	GCA_002271255.1	2	0	2	1	1	1	15	1	4	1	1	1	0	5	0	2	1	0	2	0	3	14	3	1	2	1	2	0
B. pseudocatenulatum	Human	TM10-1	GCA_003436025.1	0	0	1	1	1	1	14	1	4	1	0	0	0	5	0	2	3	0	3	0	3	14	2	2	2	1	1	1
B. pseudocatenulatum	Human	TM08-2	GCA_003436105.1	0	1	1	0	1	0	10	1	2	0	0	1	0	3	1	1	2	0	2	0	0	7	2	2	2	1	2	0
B. pseudocatenulatum	Human	TM07-3AT	GCA_003436315.1	0	0	2	1	1	1	14	1	3	1	0	1	0	5	1	2	1	0	2	0	3	14	2	2	2	1	2	0
B. pseudocatenulatum	Human	TF08-3AT	GCA_003436955.1	1	0	1	1	1	1	15	1	3	1	0	2	0	5	1	2	1	0	3	0	3	13	2	2	2	1	1	0
B. pseudocatenulatum	Human	TF07-45	GCA_003437075.1	0	1	1	1	1	1	15	1	3	1	0	2	0	5	0	2	1	0	2	0	2	9	1	2	2	1	2	0
B. pseudocatenulatum	Human	TF07-23	GCA_003437155.1	0	1	1	1	1	1	14	1	3	1	1	1	0	5	0	2	1	0	3	0	2	9	2	2	2	1	2	0
B. pseudocatenulatum	Human	TM05-11	GCA_003437435.1	0	0	1	1	1	1	14	1	3	0	0	3	0	5	0	2	1	0	2	0	3	14	2	2	2	1	1	0
B. pseudocatenulatum	Human	TF05-2AC	GCA_003437825.1	0	1	1	1	1	1	13	1	3	1	1	1	0	5	1	1	3	0	2	0	3	10	2	2	2	1	2	0
B. pseudocatenulatum	Human	TF05-19AC	GCA_003437835.1	0	1	1	1	1	2	10	1	4	1	0	2	0	5	0	1	4	0	4	0	3	9	2	2	2	1	2	0
B. pseudocatenulatum	Human	OM10-8	GCA_003438015.1	0	1	0	0	1	0	8	1	5	0	0	0	0	3	0	2	1	0	2	0	2	9	2	1	2	0	1	0
B. pseudocatenulatum	Human	OM05-2	GCA_003438405.1	0	1	1	1	1	1	16	1	3	1	0	2	0	5	0	3	3	0	2	0	3	10	2	2	2	1	2	0
B. pseudocatenulatum	Human	OF05-12	GCA_003439655.1	0	1	1	1	1	1	13	1	3	1	0	2	0	5	1	2	3	0	2	0	3	10	2	2	2	1	2	0
B. pseudocatenulatum	Human	AF26-1	GCA_003458965.1	0	0	1	1	1	1	13	1	3	1	0	2	0	5	0	1	3	0	2	0	3	10	2	2	2	1	1	0
B. pseudocatenulatum	Human	AF20-20AC	GCA_003459475.1	0	0	2	1	1	1	12	1	3	1	0	1	0	5	1	2	1	0	2	0	3	11	2	3	2	1	2	0
B. pseudocatenulatum	Human	AF18-2AC	GCA_003459865.1	0	1	1	0	1	0	7	1	2	0	0	2	0	4	0	2	2	0	2	0	1	5	1	2	2	0	1	0
B. pseudocatenulatum	Human	AF17-20AC	GCA_003460425.1	0	0	2	1	1	1	15	1	4	1	0	1	0	5	1	2	1	0	2	1	3	10	3	3	2	1	2	1
B. pseudocatenulatum	Human	OF01-21AC	GCA_003463265.1	0	0	1	0	0	0	9	1	2	0	0	1	0	5	1	2	1	0	1	0	2	7	2	3	0	0	2	0
B. pseudocatenulatum	Human	OF01-8	GCA_003463425.1	0	0	2	1	1	1	12	1	3	1	0	2	0	5	1	2	1	0	2	0	3	11	2	3	2	1	2	0
B. pseudocatenulatum	Human	OF01-2	GCA_003463455.1	0	0	2	1	1	1	12	1	3	1	0	1	0	5	1	2	1	0	2	0	3	11	2	3	2	1	2	0
B. pseudocatenulatum	Human	OF01-12	GCA_003463505.1	0	0	2	1	1	1	12	1	3	1	0	2	0	5	1	2	1	0	2	0	3	11	2	3	2	1	2	0
B. pseudocatenulatum	Human	CF01-1	GCA_003463615.1	0	0	0	0	1	0	5	1	5	0	0	2	0	2	0	1	3	0	2	0	1	10	2	2	2	0	1	0
B. pseudocatenulatum	Human	AF12-8LB-d	GCA_003464925.1	0	0	2	1	1	1	10	1	4	1	0	1	0	5	1	2	2	0	2	0	3	11	2	2	2	1	2	0
B. pseudocatenulatum	Human	AF12-10-6.0	GCA_003465065.1	0	0	2	1	1	1	10	1	4	1	0	1	0	5	1	2	2	0	2	0	3	11	2	2	2	1	2	0
B. pseudocatenulatum	Human	AF11-18	GCA_003465135.1	1	0	2	1	1	1	14	1	4	1	0	1	0	5	1	2	3	0	4	0	3	10	2	2	2	1	1	0
B. pseudocatenulatum	Human	AF12-8A-LB	GCA_003465385.1	0	0	2	1	1	1	10	1	4	1	0	1	0	5	1	2	2	0	2	0	3	11	2	2	2	1	2	0
B. pseudocatenulatum	Human	AF03-28	GCA_003465775.1	0	0	1	1	1	1	14	1	3	1	1	1	0	5	0	3	1	0	2	0	3	14	2	2	2	1	1	0
B. pseudocatenulatum	Human	AF02-36-1	GCA_003466105.1	0	1	1	1	1	1	13	1	3	1	0	1	0	5	0	3	3	0	2	0	3	10	2	2	2	1	2	0
B. pseudocatenulatum	Human	AM43-10	GCA_003467065.1	0	1	1	1	1	1	12	1	3	1	1	1	0	5	0	2	3	0	2	0	3	10	2	2	2	1	2	0
B. pseudocatenulatum	Human	AM11-10	GCA_003472415.1	0	0	2	1	1	1	13	1	3	1	0	1	0	5	0	2	3	0	2	0	3	10	3	2	2	1	2	0
B. pseudocatenulatum	Human	AF45-10BH	GCA_003474015.1	0	1	1	1	1	0	8	1	4	1	0	1	0	2	1	0	0	0	2	0	3	7	2	3	2	0	1	1
B. pseudocatenulatum	Human	AF41-3MH	GCA_003474525.1	0	1	0	0	1	1	5	1	4	0	0	0	0	2	1	2	2	0	3	0	0	5	1	2	2	1	2	0
B. pseudocatenulatum	Human	AF36-12AT	GCA_003474835.1	0	0	2	1	1	1	13	1	3	1	0	3	0	5	1	2	1	0	2	0	3	10	2	2	2	1	2	0
B. pseudocatenulatum	Human	S12	GCA_003952825.1	1	0	1	1	1	2	11	1	4	1	0	0	0	5	1	1	2	0	4	0	3	9	2	3	2	1	1	0
B. pseudocatenulatum	Human	ca_0067	GCA_004167565.1	0	0	1	1	1	1	11	0	3	1	0	1	0	5	0	1	1	0	2	0	3	9	2	2	2	1	1	0
B. pseudocatenulatum	Human	NBRC 113353	GCA_006828885.1	0	0	1	1	1	1	15	1	3	1	1	1	0	5	0	2	3	0	3	0	3	10	3	2	2	1	1	0
B. pseudocatenulatum	Human	BIOML-A193	GCA_009876975.1	2	0	1	1	0	1	12	1	3	1	0	1	0	5	0	3	1	0	2	0	3	13	2	2	2	1	1	0
B. pseudocatenulatum	Human	BIOML-A104	GCA_009882125.1	1	0	2	1	1	1	15	0	3	1	0	1	0	5	1	2	1	0	2	0	3	14	1	3	2	0	2	0
B. pseudocatenulatum	Human	BIOML-A1	GCA_009883385.1	0	0	1	1	1	1	14	0	3	1	0	1	0	5	1	2	1	0	3	0	3	10	2	2	2	0	1	0
B. pseudocatenulatum	Human	Bif4	GCA_011008535.1	0	0	2	1	1	1	11	1	3	1	1	1	0	5	0	2	1	0	2	0	3	10	3	1	2	1	2	0
B. pseudocatenulatum	Infant	LMG 10505	GCA_000741685.1	0	0	2	1	0	1	16	1	4	1	1	1	0	5	1	2	1	0	2	0	3	15	2	3	2	0	2	1
B. pseudocatenulatum	Human Milk	1896B	GCA_002075945.1	0	0	1	1	1	2	17	1	4	1	0	1	1	5	1	1	1	0	4	0	3	13	2	3	2	0	1	1
B. pseudocatenulatum		DSM 20438	GCA_000173435.1	0	0	2	1	0	1	16	1	4	1	1	2	0	5	1	2	1	0	2	0	3	15	2	3	2	0	2	1
B. pseudocatenulatum		JCM 1200	GCA_001025215.1	0	0	2	1	0	1	17	1	4	1	1	1	0	5	1	2	1	0	3	0	3	15	2	3	2	0	2	1
Upper CI				0.361929	0.409352	1.53941	0.971381	0.985124	1.06465	13.1623	0.997709	3.56485	0.941325	0.334229	1.43905	0.102459	4.88774	0.741391	2.01668	1.93525	0.0641042	2.52318	0.0641042	2.90249	11.3925	2.12216	2.374	2.0311	0.874091	1.80021	0.254599
Lower CI				0.0636028	0.143839	1.18399	0.7733	0.80211	0.807688	11.3483	0.832079	3.07345	0.718249	0.0913026	1.02904	-0.0173522	4.3463	0.450098	1.64289	1.38389	-0.021551	2.11512	-0.021551	2.45921	9.96923	1.83528	2.05153	1.84124	0.615271	1.51894	0.043273
Mean				0.212766	0.276596	1.3617	0.87234	0.893617	0.93617	12.2553	0.914894	3.31915	0.829787	0.212766	1.23404	0.0425532	4.61702	0.595745	1.82979	1.65957	0.0212766	2.31915	0.0212766	2.68085	10.6809	1.97872	2.21277	1.93617	0.744681	1.65957	0.148936

## Sheet: thermophilum 
Genome Name	Host	Strain	Accesssion	GH109	GH13	GH18	GH25	GH3	GH31	GH32	GH36	GH42	GH5	GH51	GH77
B. thermophilum	Infant	RBL67	GCF_000347695.1	1	14	1	1	1	1	2	1	1	3	1	2
B. thermophilum	Bovine	DSM 20212	GCF_000687575.1	1	16	0	1	1	1	1	1	1	1	1	2
B. thermophilum	Pig	DSM 20210	GCF_000771265.1	1	15	1	1	1	1	2	1	1	3	1	2
B. thermophilum	Pig	1543B	GCF_002846655.1	0	17	1	1	3	1	3	1	1	3	1	2
B. thermophilum	Pig	1542B	GCF_002846785.1	0	16	1	1	1	1	1	1	1	3	1	2
Upper CI				1.28009	17.0157	1.35529	1	2.51058	1	2.83885	1	1	3.71058	1	2
Lower CI				-0.0800874	14.1843	0.244711	1	0.289422	1	0.761149	1	1	1.48942	1	2
Mean				0.6	15.6	0.8	1	1.4	1	1.8	1	1	2.6	1	2

[truncated: 2 more sheets: suis, moukalabense]
